# Supplementary material
Source: Research Square preprint supplement (doi:10.21203/rs.3.rs-9203063/v1)
Supplement: Supplementary file 1 [file f0f56824315525f8c783e9c5.docx]

# Global diversity and Azithromycin resistance of *Salmonella enterica* serovar London: a genomic epidemiology study

Running Title: Global genomic epidemiology of *S.* London

**Supplementary Figure**


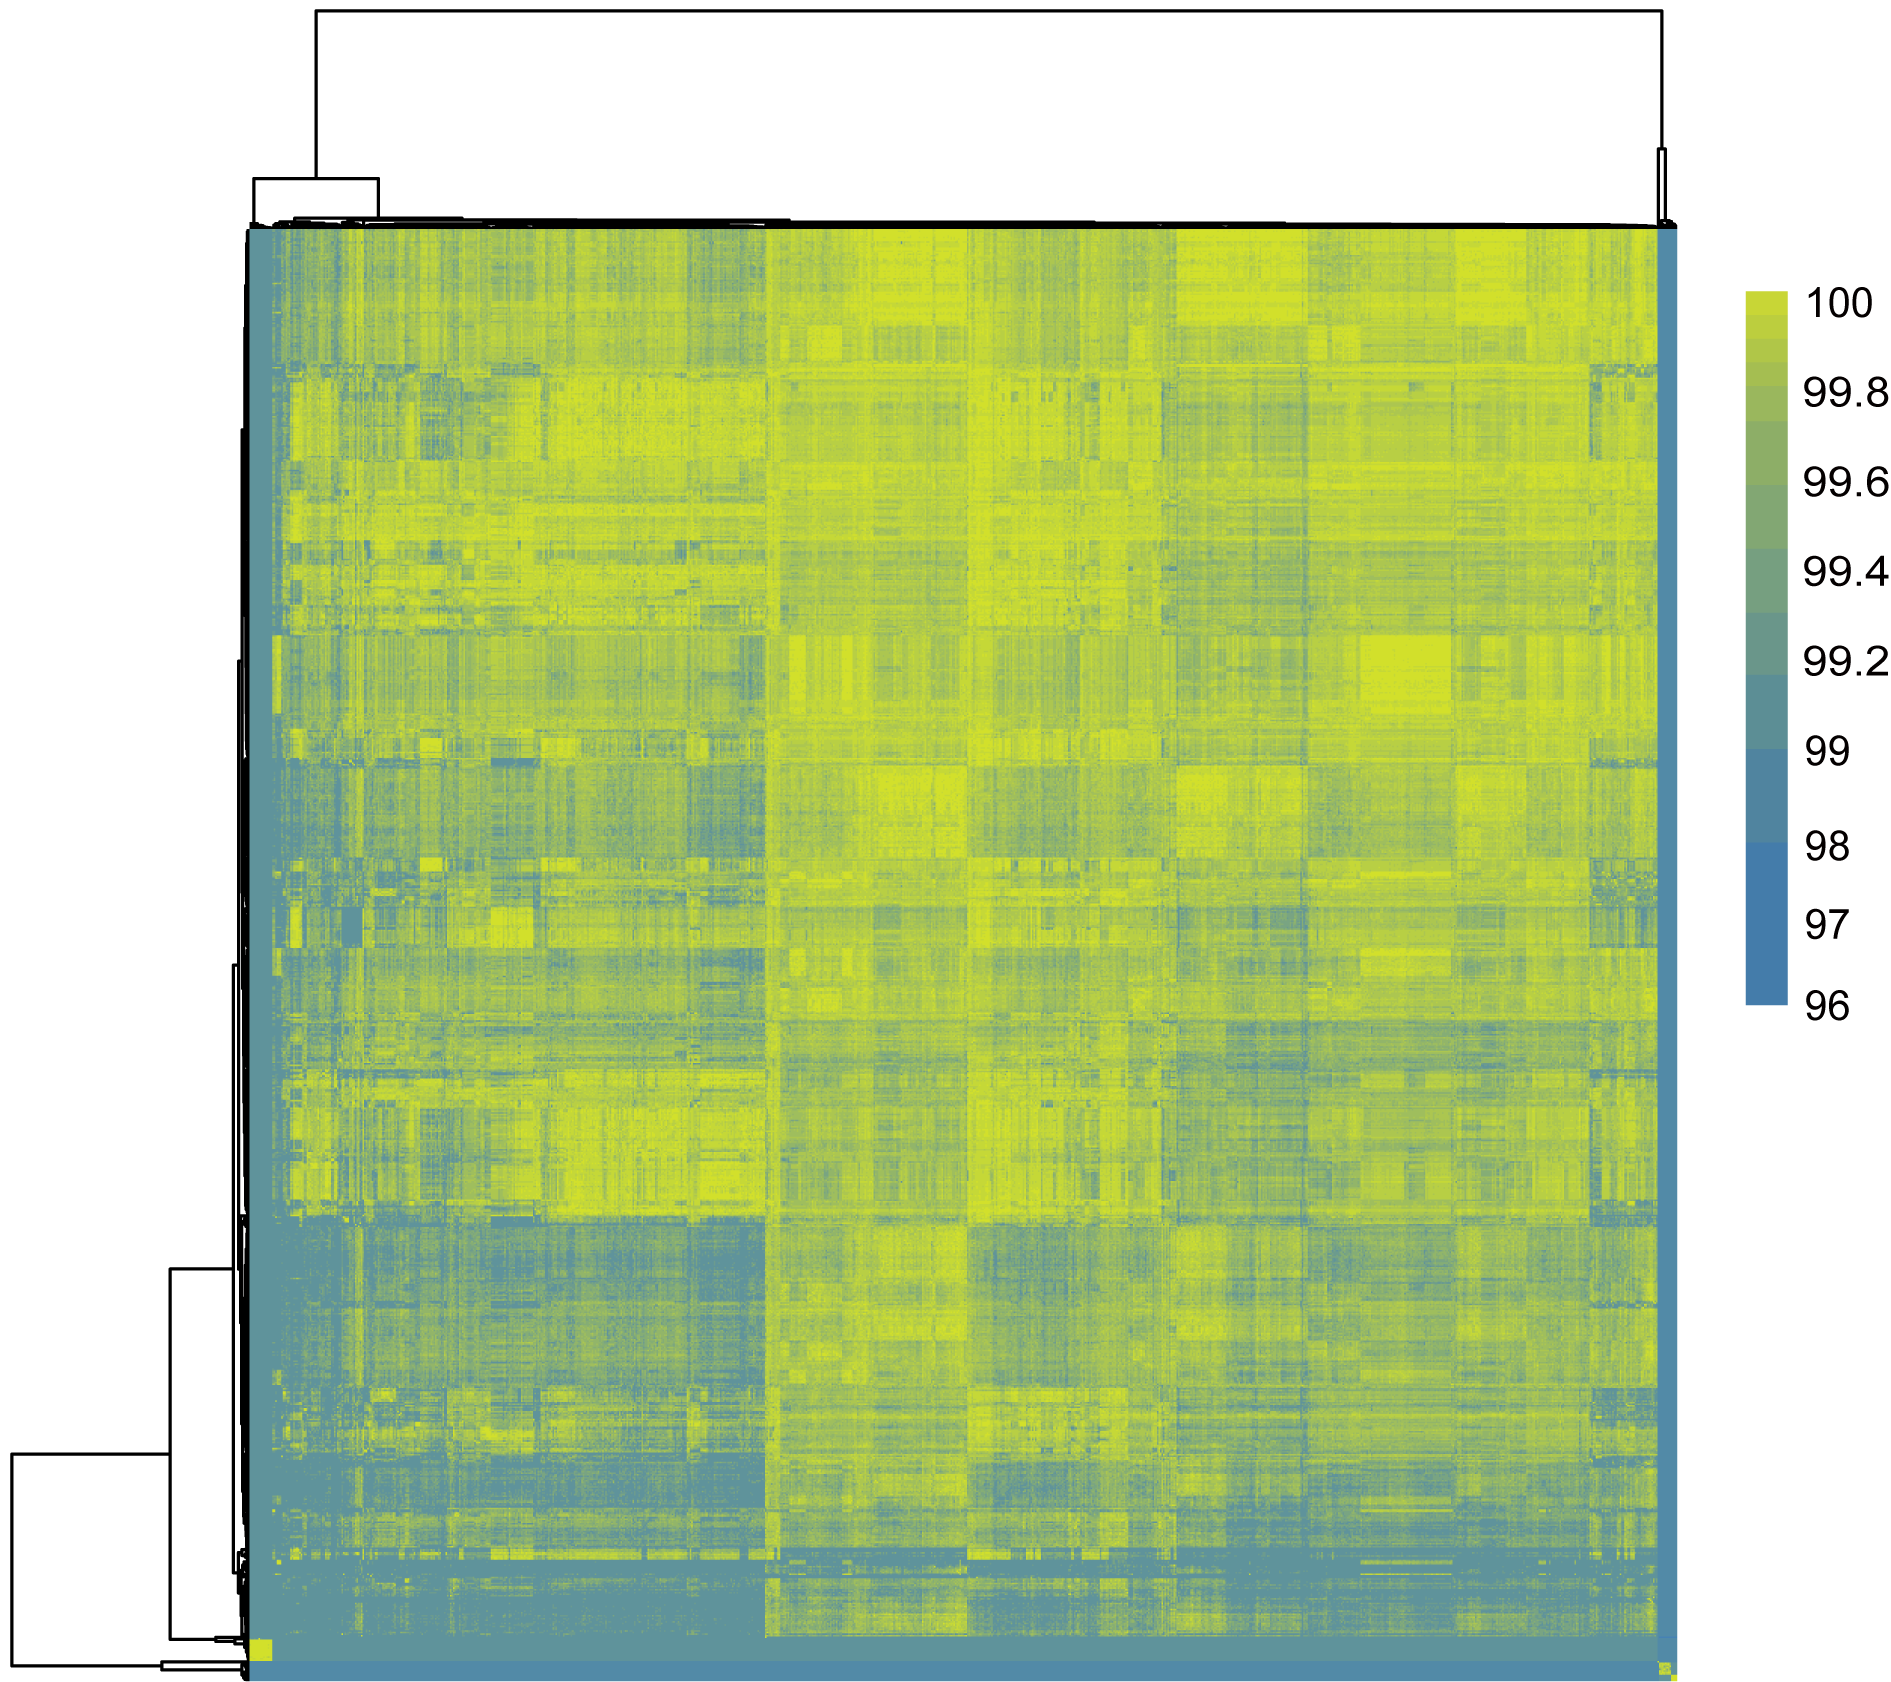


**Extended Data Fig. 1 | Heatmap of average nucleotide identity (ANI) values for the 946 *Salmonella* London isolates analyzed in this study.** The color scale indicates ANI values ranging from 96 (steelblue) to 100 (yellow). The genome of *Salmonella enterica* serovar London CFSAN001081 (GCA_018338335.1) served as the reference.


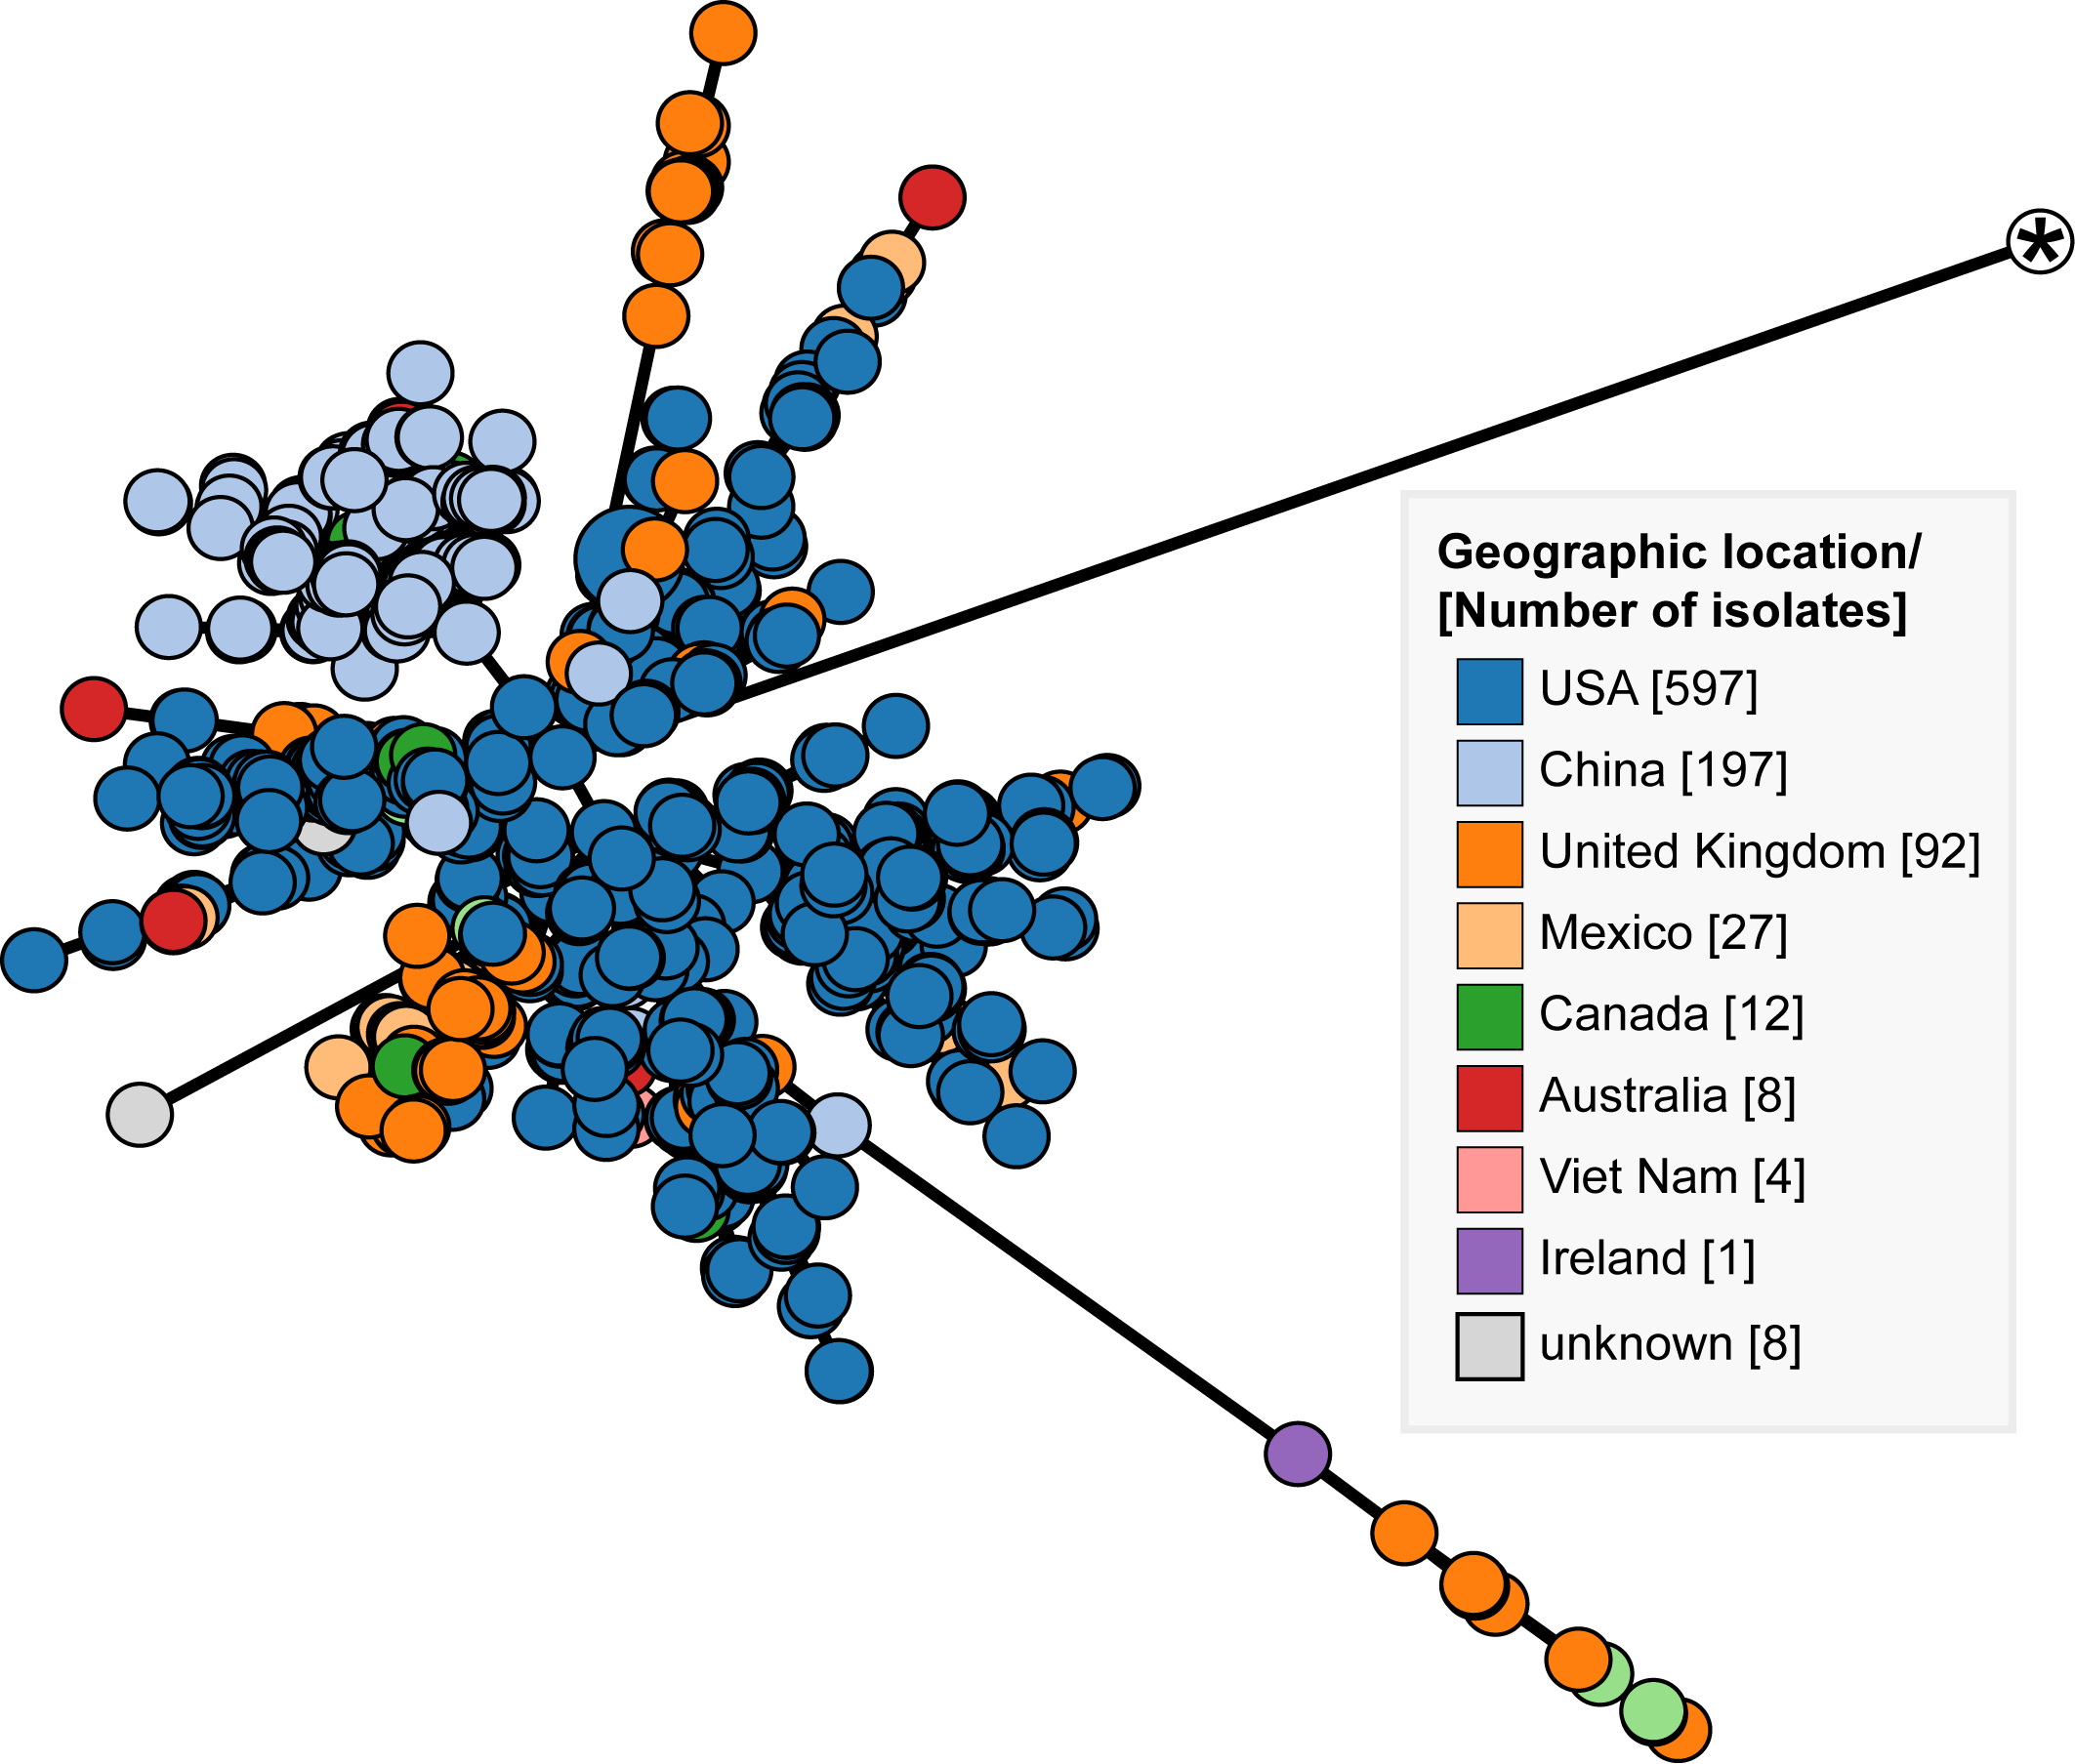


**Extended Data Fig. 2 | Minimum Spanning Tree (MST) of *S.* London based on the cgMLST analysis.** Each small circle represents an independent isolate, and different colors indicate different isolation regions. *: *Salmonella enterica* serovar Typhimurium LT2 (GCF_000006945.2) served as the outgroup in the cgMLST MSTree.


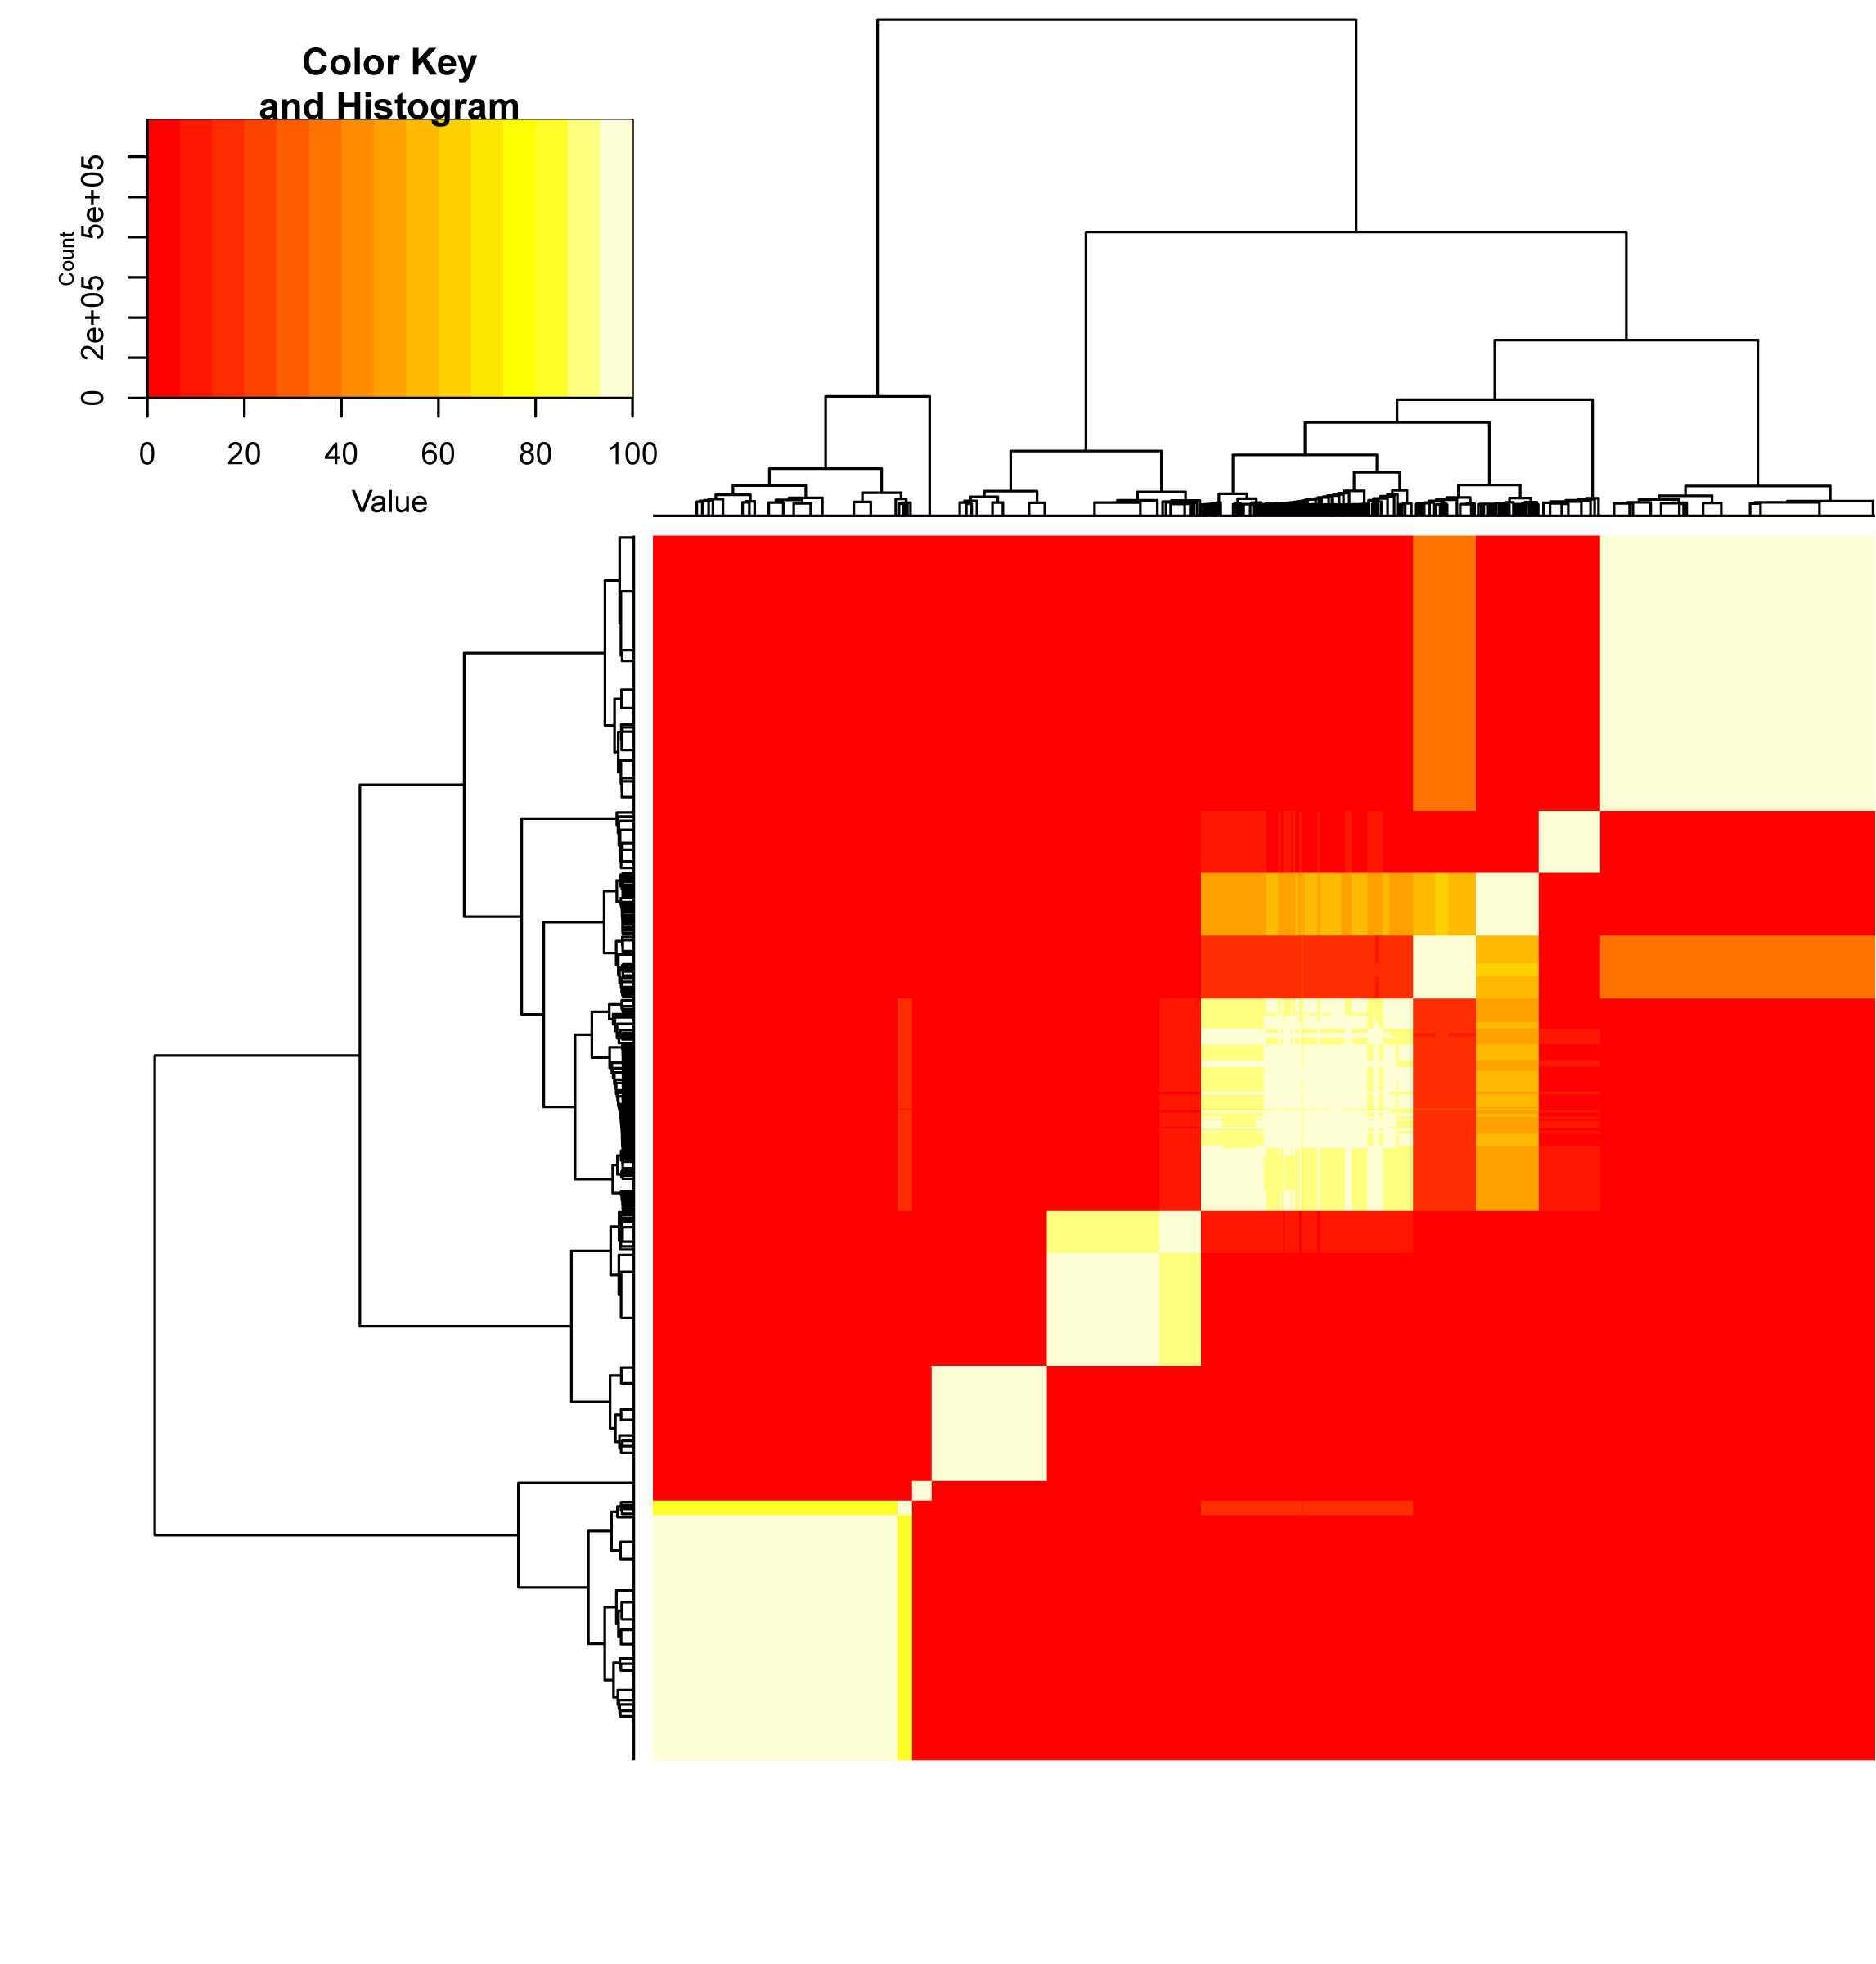


**Extended Data Fig. 3 | Heatmap of sub-clades clustering stability for *S.* London isolates.** Population structure was resolved using fastBAPS hierarchical Bayesian clustering. The robustness of the inferred clusters was confirmed by Bootstrap. The color gradient ranges from red to white, representing stability values from 0 to 100.

**Supplementary Table**

**Extended Data Table 1 | Genomic overview of 137 Salmonella London isolates in this study and 809 global genomes in the GenBank database.**

| **No.** | **Strain** | **Geographic location** | **Year** | **Isolation source** | **Serovar** | **Genome size (bp)** | **Assembly Level** | **Contigs** | **N50 (bp)** | **GC (mol%)** | **BioSample Accession** | **Assembly Accession** |
| --- | --- | --- | --- | --- | --- | --- | --- | --- | --- | --- | --- | --- |
| 1 | 01_SAL17_033 | China, Zhejiang, Hangzhou | 2017 | Patient, feces | London | 4,747,700 | Contig | 79 | 303,769 | 52.3 | this study | |
| 2 | 02_SAL17_042 | China, Zhejiang, Hangzhou | 2017 | Patient, feces | London | 4,785,569 | Contig | 92 | 252,531 | 52.3 | this study | |
| 3 | 03_SAL17_048 | China, Zhejiang, Hangzhou | 2017 | Patient, feces | London | 4,884,154 | Contig | 124 | 421,682 | 52.2 | this study | |
| 4 | 04_SAL17_069 | China, Zhejiang, Hangzhou | 2017 | Patient, feces | London | 4,967,558 | Contig | 98 | 349,330 | 52.0 | this study | |
| 5 | 05_SAL17_073 | China, Zhejiang, Hangzhou | 2017 | Patient, feces | London | 4,768,444 | Contig | 82 | 303,769 | 52.2 | this study | |
| 6 | 06_SAL17_091 | China, Zhejiang, Hangzhou | 2017 | Patient, feces | London | 4,884,049 | Contig | 104 | 237,509 | 52.2 | this study | |
| 7 | 07_SAL17_092 | China, Zhejiang, Hangzhou | 2017 | Patient, feces | London | 4,881,679 | Contig | 91 | 407,502 | 52.2 | this study | |
| 8 | 08_SAL17_094 | China, Zhejiang, Hangzhou | 2017 | Patient, feces | London | 4,814,446 | Contig | 108 | 288,958 | 52.2 | this study | |
| 9 | 09_SAL17_098 | China, Zhejiang, Hangzhou | 2017 | Patient, feces | London | 4,755,832 | Contig | 79 | 303,769 | 52.3 | this study | |
| 10 | 10_SAL17_109 | China, Zhejiang, Hangzhou | 2017 | Patient, feces | London | 4,789,176 | Contig | 84 | 349,330 | 52.3 | this study | |
| 11 | 11_SAL17_121 | China, Zhejiang, Hangzhou | 2017 | Patient, feces | London | 4,787,382 | Contig | 86 | 288,958 | 52.3 | this study | |
| 12 | 12_SAL17_158 | China, Zhejiang, Hangzhou | 2017 | Patient, feces | London | 4,653,144 | Contig | 76 | 349,330 | 52.2 | this study | |
| 13 | 13_SAL17_185 | China, Zhejiang, Hangzhou | 2017 | Food, pork | London | 4,743,441 | Contig | 88 | 264,748 | 52.2 | this study | |
| 14 | 14_SAL17_187 | China, Zhejiang, Hangzhou | 2017 | Food, pork | London | 4,827,934 | Contig | 85 | 292,604 | 52.2 | this study | |
| 15 | 15_SAL17_193 | China, Zhejiang, Hangzhou | 2017 | Food, pork | London | 4,790,475 | Contig | 84 | 349,330 | 52.2 | this study | |
| 16 | 16_SAL18_034 | China, Zhejiang, Hangzhou | 2018 | Patient, feces | London | 4,702,512 | Contig | 88 | 433,333 | 52.2 | this study | |
| 17 | 17_SAL18_072 | China, Zhejiang, Hangzhou | 2018 | Patient, feces | London | 4,688,185 | Contig | 69 | 303,769 | 52.2 | this study | |
| 18 | 18_SAL18_088 | China, Zhejiang, Hangzhou | 2018 | Patient, feces | London | 4,816,181 | Contig | 113 | 303,769 | 52.3 | this study | |
| 19 | 19_SAL18_091 | China, Zhejiang, Hangzhou | 2018 | Patient, feces | London | 4,844,028 | Contig | 143 | 288,958 | 52.2 | this study | |
| 20 | 20_SAL18_115 | China, Zhejiang, Hangzhou | 2018 | Patient, feces | London | 4,805,548 | Contig | 98 | 264,748 | 52.3 | this study | |
| 21 | 21_SAL18_125 | China, Zhejiang, Hangzhou | 2018 | Food, pork | London | 4,820,742 | Contig | 89 | 288,958 | 52.3 | this study | |
| 22 | 22_SAL18_137 | China, Zhejiang, Hangzhou | 2018 | Food, pork | London | 4,688,415 | Contig | 75 | 288,958 | 52.2 | this study | |
| 23 | 23_SAL18_138 | China, Zhejiang, Hangzhou | 2018 | Food, pork | London | 4,689,577 | Contig | 80 | 245,876 | 52.2 | this study | |
| 24 | 23SAL064 | China, Zhejiang, Hangzhou | 2023 | Patient, feces | London | 4,721,020 | Contig | 121 | 252,531 | 52.2 | this study | |
| 25 | 23SAL065 | China, Zhejiang, Hangzhou | 2023 | Patient, feces | London | 4,754,258 | Contig | 133 | 252,531 | 52.2 | this study | |
| 26 | 23SAL075 | China, Zhejiang, Hangzhou | 2023 | Patient, feces | London | 4,711,811 | Contig | 91 | 433,333 | 52.2 | this study | |
| 27 | 23SAL104 | China, Zhejiang, Hangzhou | 2023 | Patient, feces | London | 4,831,750 | Contig | 77 | 405,190 | 52.1 | this study | |
| 28 | 23SAL187 | China, Zhejiang, Hangzhou | 2023 | Patient, feces | London | 4,807,766 | Contig | 106 | 259,035 | 52.3 | this study | |
| 29 | 23SAL188 | China, Zhejiang, Hangzhou | 2023 | Patient, feces | London | 4,709,407 | Contig | 108 | 433,333 | 52.2 | this study | |
| 30 | 23SAL287 | China, Zhejiang, Hangzhou | 2023 | Patient, feces | London | 4,694,814 | Contig | 91 | 370,417 | 52.3 | this study | |
| 31 | 24_SAL18_145 | China, Zhejiang, Hangzhou | 2018 | Food, pork | London | 4,820,889 | Contig | 92 | 288,958 | 52.3 | this study | |
| 32 | 25_SAL18_155 | China, Zhejiang, Hangzhou | 2018 | Patient, feces | London | 4,735,174 | Contig | 79 | 303,769 | 52.3 | this study | |
| 33 | 26_SAL18_163 | China, Zhejiang, Hangzhou | 2018 | Patient, feces | London | 4,833,837 | Contig | 129 | 303,769 | 52.2 | this study | |
| 34 | 27_SAL18_180 | China, Zhejiang, Hangzhou | 2018 | Patient, feces | London | 4,786,074 | Contig | 76 | 407,502 | 52.1 | this study | |
| 35 | 28_SAL18_181 | China, Zhejiang, Hangzhou | 2018 | Patient, feces | London | 4,781,458 | Contig | 83 | 407,502 | 52.1 | this study | |
| 36 | 29_SAL18_236 | China, Zhejiang, Hangzhou | 2018 | Food, pork | London | 4,803,108 | Contig | 94 | 407,502 | 52.2 | this study | |
| 37 | 30_SAL18_268 | China, Zhejiang, Hangzhou | 2018 | Food, beef | London | 4,772,360 | Contig | 93 | 394,345 | 52.3 | this study | |
| 38 | 31_SAL18_269 | China, Zhejiang, Hangzhou | 2018 | Food, pork | London | 4,687,262 | Contig | 92 | 257,035 | 52.2 | this study | |
| 39 | 32_SAL19_041 | China, Zhejiang, Hangzhou | 2019 | Patient, feces | London | 4,787,222 | Contig | 125 | 225,982 | 52.2 | this study | |
| 40 | 33_SAL19_055 | China, Zhejiang, Hangzhou | 2019 | Patient, feces | London | 4,689,872 | Contig | 96 | 249,532 | 52.2 | this study | |
| 41 | 34_SAL19_056 | China, Zhejiang, Hangzhou | 2019 | Patient, feces | London | 4,691,383 | Contig | 106 | 225,982 | 52.2 | this study | |
| 42 | 35_SAL19_059 | China, Zhejiang, Hangzhou | 2019 | Patient, blood | London | 4,711,380 | Contig | 119 | 232,786 | 52.2 | this study | |
| 43 | 36_SAL19_062 | China, Zhejiang, Hangzhou | 2019 | Patient, feces | London | 4,711,078 | Contig | 82 | 407,502 | 52.2 | this study | |
| 44 | 37_SAL19_063 | China, Zhejiang, Hangzhou | 2019 | Patient, feces | London | 4,684,678 | Contig | 75 | 288,958 | 52.2 | this study | |
| 45 | 38_SAL19_137 | China, Zhejiang, Hangzhou | 2019 | Patient, feces | London | 4,917,537 | Contig | 118 | 289,096 | 52.1 | this study | |
| 46 | 39_SAL19_140 | China, Zhejiang, Hangzhou | 2019 | Patient, feces | London | 4,689,186 | Contig | 69 | 407,502 | 52.2 | this study | |
| 47 | 40_SAL19_147 | China, Zhejiang, Hangzhou | 2019 | Patient, feces | London | 4,863,526 | Contig | 97 | 433,095 | 52.0 | this study | |
| 48 | 41_SAL19_150 | China, Zhejiang, Hangzhou | 2019 | Patient, feces | London | 4,794,311 | Contig | 104 | 288,958 | 52.3 | this study | |
| 49 | 42_SAL19_253 | China, Zhejiang, Hangzhou | 2019 | Food, chicken | London | 4,835,769 | Contig | 166 | 303,769 | 52.3 | this study | |
| 50 | 44_SAL19_265 | China, Zhejiang, Hangzhou | 2019 | Food, pork | London | 4,704,954 | Contig | 90 | 407,502 | 52.2 | this study | |
| 51 | 45_SAL19_266 | China, Zhejiang, Hangzhou | 2019 | Food, pork | London | 4,743,794 | Contig | 89 | 349,330 | 52.3 | this study | |
| 52 | 46_SAL19_267 | China, Zhejiang, Hangzhou | 2019 | Food, pork | London | 4,750,980 | Contig | 92 | 421,682 | 52.3 | this study | |
| 53 | 47_SAL19_269 | China, Zhejiang, Hangzhou | 2019 | Food, pork | London | 4,912,161 | Contig | 115 | 433,095 | 51.9 | this study | |
| 54 | 48_SAL19_280 | China, Zhejiang, Hangzhou | 2019 | Food, pork | London | 4,841,413 | Contig | 111 | 305,565 | 52.2 | this study | |
| 55 | 49_SAL19_293 | China, Zhejiang, Hangzhou | 2019 | Food, pork | London | 4,695,424 | Contig | 81 | 349,865 | 52.1 | this study | |
| 56 | 50_SAL19_299 | China, Zhejiang, Hangzhou | 2019 | Food, pork | London | 4,717,140 | Contig | 96 | 303,769 | 52.2 | this study | |
| 57 | 51_SAL19_301 | China, Zhejiang, Hangzhou | 2019 | Food, pork | London | 4,823,809 | Contig | 77 | 350,654 | 52.2 | this study | |
| 58 | 52_SAL20_202 | China, Zhejiang, Hangzhou | 2020 | Patient, feces | London | 4,787,818 | Contig | 103 | 288,958 | 52.3 | this study | |
| 59 | 53_SAL20_266 | China, Zhejiang, Hangzhou | 2020 | Food, pork | London | 4,688,061 | Contig | 84 | 407,502 | 52.2 | this study | |
| 60 | 54_SAL20_285 | China, Zhejiang, Hangzhou | 2020 | Food, pork | London | 4,827,049 | Contig | 74 | 350,654 | 52.2 | this study | |
| 61 | 55_SAL20_296 | China, Zhejiang, Hangzhou | 2020 | Food, pork | London | 4,719,049 | Contig | 82 | 303,926 | 52.2 | this study | |
| 62 | 56_SAL20_300 | China, Zhejiang, Hangzhou | 2020 | Food, pork | London | 4,788,138 | Contig | 73 | 349,286 | 52.3 | this study | |
| 63 | 57_SAL21_232 | China, Zhejiang, Hangzhou | 2021 | Patient, feces | London | 4,771,941 | Contig | 118 | 407,502 | 52.2 | this study | |
| 64 | 58_SAL21_280 | China, Zhejiang, Hangzhou | 2021 | Patient, feces | London | 4,809,314 | Contig | 98 | 259,409 | 52.3 | this study | |
| 65 | 59_SAL21_283 | China, Zhejiang, Hangzhou | 2021 | Patient, feces | London | 4,771,300 | Contig | 96 | 264,748 | 52.3 | this study | |
| 66 | 60_SAL21_287 | China, Zhejiang, Hangzhou | 2021 | Patient, feces | London | 4,796,701 | Contig | 105 | 288,958 | 52.3 | this study | |
| 67 | 61_SAL21_494 | China, Zhejiang, Hangzhou | 2021 | Patient, feces | London | 4,735,579 | Contig | 103 | 349,330 | 52.2 | this study | |
| 68 | 62_SAL21_522 | China, Zhejiang, Hangzhou | 2021 | Food, pork | London | 4,754,163 | Contig | 87 | 303,769 | 52.3 | this study | |
| 69 | 63_SAL21_523 | China, Zhejiang, Hangzhou | 2021 | Food, pork | London | 4,869,123 | Contig | 90 | 288,958 | 52.2 | this study | |
| 70 | 65_SAL21_530 | China, Zhejiang, Hangzhou | 2021 | Food, pork | London | 4,825,616 | Contig | 78 | 350,653 | 52.2 | this study | |
| 71 | 67_SAL21_533 | China, Zhejiang, Hangzhou | 2021 | Food, pork | London | 4,728,531 | Contig | 101 | 288,958 | 52.2 | this study | |
| 72 | 68_SAL21_534 | China, Zhejiang, Hangzhou | 2021 | Food, pork | London | 4,745,651 | Contig | 88 | 344,755 | 52.3 | this study | |
| 73 | 69_SAL21_535 | China, Zhejiang, Hangzhou | 2021 | Food, pork | London | 4,732,615 | Contig | 81 | 349,330 | 52.3 | this study | |
| 74 | 70_SAL21_536 | China, Zhejiang, Hangzhou | 2021 | Food, pork | London | 4,780,389 | Contig | 143 | 350,654 | 52.0 | this study | |
| 75 | SAL20-001 | China, Zhejiang, Hangzhou | 2020 | Patient, feces | London | 4,797,711 | Contig | 101 | 406,627 | 52.2 | this study | |
| 76 | SAL20-009 | China, Zhejiang, Hangzhou | 2020 | Patient, feces | London | 4,691,297 | Contig | 77 | 375,730 | 52.3 | this study | |
| 77 | SAL20-011 | China, Zhejiang, Hangzhou | 2020 | Patient, feces | London | 4,801,113 | Contig | 69 | 433,318 | 52.1 | this study | |
| 78 | SAL20-033 | China, Zhejiang, Hangzhou | 2020 | Patient, feces | London | 4,786,787 | Contig | 104 | 320,960 | 52.3 | this study | |
| 79 | SAL20-040 | China, Zhejiang, Hangzhou | 2020 | Patient, feces | London | 4,778,487 | Contig | 86 | 433,310 | 52.2 | this study | |
| 80 | SAL20-062 | China, Zhejiang, Hangzhou | 2020 | Patient, feces | London | 4,804,898 | Contig | 97 | 352,170 | 52.3 | this study | |
| 81 | SAL20-099 | China, Zhejiang, Hangzhou | 2020 | Patient, feces | London | 4,701,945 | Contig | 76 | 288,958 | 52.2 | this study | |
| 82 | SAL20-131 | China, Zhejiang, Hangzhou | 2020 | Patient, feces | London | 4,737,924 | Contig | 98 | 302,852 | 52.3 | this study | |
| 83 | SAL20-132 | China, Zhejiang, Hangzhou | 2020 | Patient, feces | London | 4,720,895 | Contig | 64 | 421,682 | 52.2 | this study | |
| 84 | SAL20-144 | China, Zhejiang, Hangzhou | 2020 | Patient, blood | London | 4,786,595 | Contig | 84 | 433,332 | 52.1 | this study | |
| 85 | SAL20-147 | China, Zhejiang, Hangzhou | 2020 | Patient, feces | London | 4,787,994 | Contig | 94 | 407,502 | 52.3 | this study | |
| 86 | SAL20-195 | China, Zhejiang, Hangzhou | 2020 | Patient, feces | London | 4,766,715 | Contig | 82 | 287,672 | 52.3 | this study | |
| 87 | SAL20-196 | China, Zhejiang, Hangzhou | 2020 | Patient, feces | London | 4,828,486 | Contig | 88 | 406,627 | 52.2 | this study | |
| 88 | SAL2022-017 | China, Zhejiang, Hangzhou | 2022 | Patient, feces | London | 4,699,004 | Contig | 100 | 407,502 | 52.3 | this study | |
| 89 | SAL2022-034 | China, Zhejiang, Hangzhou | 2022 | Patient, feces | London | 4,811,590 | Contig | 108 | 349,330 | 52.3 | this study | |
| 90 | SAL2022-045 | China, Zhejiang, Hangzhou | 2022 | Patient, feces | London | 4,825,275 | Contig | 118 | 246,035 | 52.3 | this study | |
| 91 | SAL2022-146 | China, Zhejiang, Hangzhou | 2022 | Patient, feces | London | 4,774,628 | Contig | 107 | 265,755 | 52.3 | this study | |
| 92 | SAL2022-192 | China, Zhejiang, Hangzhou | 2022 | Patient, feces | London | 4,824,282 | Contig | 143 | 349,865 | 52.3 | this study | |
| 93 | SAL2022-196 | China, Zhejiang, Hangzhou | 2022 | Patient, feces | London | 4,787,841 | Contig | 90 | 349,330 | 52.2 | this study | |
| 94 | SAL2022-238 | China, Zhejiang, Hangzhou | 2022 | Patient, feces | London | 4,733,092 | Contig | 104 | 349,329 | 52.3 | this study | |
| 95 | SAL2022-287 | China, Zhejiang, Hangzhou | 2022 | Patient, feces | London | 4,773,302 | Contig | 95 | 407,502 | 52.1 | this study | |
| 96 | SAL2022-298 | China, Zhejiang, Hangzhou | 2022 | Patient, feces | London | 4,716,766 | Contig | 101 | 259,035 | 52.2 | this study | |
| 97 | SAL2022-317 | China, Zhejiang, Hangzhou | 2022 | Patient, feces | London | 4,709,156 | Contig | 100 | 407,427 | 52.2 | this study | |
| 98 | SAL2022-324 | China, Zhejiang, Hangzhou | 2022 | Patient, feces | London | 4,695,458 | Contig | 96 | 337,824 | 52.3 | this study | |
| 99 | SAL2022-409 | China, Zhejiang, Hangzhou | 2022 | Patient, feces | London | 4,811,763 | Contig | 112 | 259,037 | 52.3 | this study | |
| 100 | SAL2022-427 | China, Zhejiang, Hangzhou | 2022 | Patient, feces | London | 4,782,351 | Contig | 106 | 259,035 | 52.3 | this study | |
| 101 | SAL2022-438 | China, Zhejiang, Hangzhou | 2022 | Patient, feces | London | 4,921,538 | Contig | 101 | 288,958 | 52.2 | this study | |
| 102 | SAL2022-511 | China, Zhejiang, Hangzhou | 2022 | Food, pork | London | 4,770,874 | Contig | 107 | 288,958 | 52.3 | this study | |
| 103 | SAL2022-519 | China, Zhejiang, Hangzhou | 2022 | Food, beef | London | 4,945,981 | Contig | 136 | 288,958 | 52.2 | this study | |
| 104 | SAL2022-537 | China, Zhejiang, Hangzhou | 2022 | Food, pork | London | 4,820,539 | Contig | 122 | 264,585 | 52.3 | this study | |
| 105 | SAL2022-542 | China, Zhejiang, Hangzhou | 2022 | Food, pork | London | 4,672,360 | Contig | 83 | 370,243 | 52.3 | this study | |
| 106 | SAL2022-571 | China, Zhejiang, Hangzhou | 2022 | Food, chicken | London | 4,783,274 | Contig | 99 | 421,682 | 52.3 | this study | |
| 107 | SAL21-054 | China, Zhejiang, Hangzhou | 2021 | Patient, feces | London | 4,823,907 | Contig | 86 | 237,541 | 52.3 | this study | |
| 108 | SAL21-121 | China, Zhejiang, Hangzhou | 2021 | Patient, feces | London | 4,653,101 | Contig | 83 | 226,301 | 52.2 | this study | |
| 109 | SAL21-125 | China, Zhejiang, Hangzhou | 2021 | Patient, feces | London | 4,653,057 | Contig | 91 | 182,822 | 52.2 | this study | |
| 110 | SAL21-128 | China, Zhejiang, Hangzhou | 2021 | Patient, feces | London | 4,641,674 | Contig | 113 | 225,972 | 52.3 | this study | |
| 111 | SAL21-155 | China, Zhejiang, Hangzhou | 2021 | Patient, feces | London | 4,696,303 | Contig | 85 | 252,531 | 52.3 | this study | |
| 112 | SAL21-175 | China, Zhejiang, Hangzhou | 2021 | Patient, feces | London | 4,842,831 | Contig | 94 | 303,769 | 52.3 | this study | |
| 113 | SAL21-176 | China, Zhejiang, Hangzhou | 2021 | Patient, feces | London | 4,780,522 | Contig | 91 | 303,769 | 52.3 | this study | |
| 114 | SAL21-181 | China, Zhejiang, Hangzhou | 2021 | Patient, feces | London | 4,787,368 | Contig | 92 | 288,958 | 52.3 | this study | |
| 115 | SAL21-259 | China, Zhejiang, Hangzhou | 2021 | Patient, feces | London | 4,807,473 | Contig | 75 | 350,653 | 52.2 | this study | |
| 116 | SAL21-292 | China, Zhejiang, Hangzhou | 2021 | Patient, feces | London | 4,788,315 | Contig | 138 | 225,423 | 52.3 | this study | |
| 117 | SAL21-293 | China, Zhejiang, Hangzhou | 2021 | Patient, feces | London | 4,830,992 | Contig | 126 | 258,920 | 52.3 | this study | |
| 118 | SAL21-301 | China, Zhejiang, Hangzhou | 2021 | Patient, feces | London | 4,721,816 | Contig | 105 | 433,285 | 52.2 | this study | |
| 119 | SAL21-304 | China, Zhejiang, Hangzhou | 2021 | Patient, feces | London | 4,777,351 | Contig | 133 | 264,748 | 52.3 | this study | |
| 120 | SAL21-449 | China, Zhejiang, Hangzhou | 2021 | Patient, feces | London | 4,782,911 | Contig | 102 | 349,865 | 52.3 | this study | |
| 121 | SAL21-463 | China, Zhejiang, Hangzhou | 2021 | Patient, blood | London | 4,707,282 | Contig | 78 | 288,958 | 52.2 | this study | |
| 122 | SAL23-011 | China, Zhejiang, Hangzhou | 2023 | Patient, feces | London | 4,848,412 | Contig | 105 | 407,541 | 52.2 | this study | |
| 123 | SAL23-133 | China, Zhejiang, Hangzhou | 2023 | Patient, feces | London | 4,829,674 | Contig | 100 | 407,502 | 52.2 | this study | |
| 124 | SAL23-176 | China, Zhejiang, Hangzhou | 2023 | Patient, feces | London | 4,682,680 | Contig | 94 | 351,239 | 52.2 | this study | |
| 125 | SAL23-185 | China, Zhejiang, Hangzhou | 2023 | Patient, feces | London | 4,817,053 | Contig | 107 | 386,524 | 52.2 | this study | |
| 126 | SAL23-204 | China, Zhejiang, Hangzhou | 2023 | Patient, feces | London | 4,621,090 | Contig | 109 | 375,073 | 52.3 | this study | |
| 127 | SAL23-207 | China, Zhejiang, Hangzhou | 2023 | Patient, feces | London | 4,717,092 | Contig | 145 | 356,624 | 52.2 | this study | |
| 128 | SAL23-239 | China, Zhejiang, Hangzhou | 2023 | Patient, feces | London | 4,787,066 | Contig | 94 | 407,502 | 52.2 | this study | |
| 129 | SAL23-512 | China, Zhejiang, Hangzhou | 2023 | Patient, feces | London | 4,765,130 | Contig | 114 | 365,511 | 52.2 | this study | |
| 130 | SAL23-517 | China, Zhejiang, Hangzhou | 2023 | Patient, feces | London | 4,695,008 | Contig | 101 | 433,330 | 52.2 | this study | |
| 131 | SAL23-522 | China, Zhejiang, Hangzhou | 2023 | Patient, feces | London | 4,690,821 | Contig | 96 | 292,592 | 52.2 | this study | |
| 132 | ZJ22HZ0420 | China, Zhejiang, Hangzhou | 2022 | Patient, feces | London | 4,774,281 | Contig | 96 | 386,524 | 52.3 | this study | |
| 133 | ZJ22HZ0421 | China, Zhejiang, Hangzhou | 2022 | Patient, feces | London | 4,643,680 | Contig | 85 | 407,502 | 52.3 | this study | |
| 134 | ZJHZ22SAL037 | China, Zhejiang, Hangzhou | 2022 | Patient, feces | London | 4,639,096 | Contig | 91 | 407,834 | 52.3 | this study | |
| 135 | ZJHZ22SAL102 | China, Zhejiang, Hangzhou | 2022 | Patient, feces | London | 4,648,022 | Contig | 89 | 433,497 | 52.2 | this study | |
| 136 | ZJHZ22SAL110 | China, Zhejiang, Hangzhou | 2022 | Patient, feces | London | 4,723,020 | Contig | 95 | 433,498 | 52.2 | this study | |
| 137 | ZJHZ22SAL154 | China, Zhejiang, Hangzhou | 2022 | Patient, feces | London | 4,723,020 | Contig | 95 | 433,498 | 52.2 | this study | |
| 138 | CFSAN001081 | - | - | Environmental swab dry milk environment | London | 4,240,424 | Contig | 1963 | 4,737 | 53.0 | SAMN01816346 | GCA_000487755 |
| 139 | CVM N38882 | USA, MD | 2012 | Food, pork chop | London | 4,878,864 | Contig | 104 | 133,487 | 52.0 | SAMN02699292 | GCA_001479935 |
| 140 | 79-1783 | - | - | - | London | 4,710,552 | Contig | 489 | 47,652 | 52.0 | SAMN03264923 | GCA_002047085 |
| 141 | 95-0457 | - | - | - | London | 4,973,779 | Contig | 77 | 192,424 | 52.0 | SAMN03264921 | GCA_002047355 |
| 142 | 90-0264 | - | - | - | London | 4,749,277 | Contig | 95 | 225,397 | 52.0 | SAMN03264922 | GCA_002048305 |
| 143 | BCW_2866 | - | - | - | London | 4,675,757 | Contig | 49 | 205,308 | 52.0 | SAMN02368731 | GCA_002063165 |
| 144 | BCW_2725 | China, Taiwan | 1998 | Patient | London | 4,484,878 | Contig | 66 | 212,377 | 52.0 | SAMN02368602 | GCA_002064515 |
| 145 | 20904 | United Kingdom | - | Patient | London | 4,567,779 | Contig | 105 | 78,303 | 52.0 | SAMN04363883 | GCA_003875195 |
| 146 | 325568 | United Kingdom | 2016 | Patient | London | 4,705,269 | Contig | 45 | 181,179 | 52.5 | SAMN09277840 | GCA_003881515 |
| 147 | 522009 | United Kingdom | 2018 | Patient | London | 4,819,388 | Contig | 99 | 133,254 | 52.0 | SAMN09396537 | GCA_003886945 |
| 148 | 593490 | United Kingdom | 2018 | Patient | London | 4,604,508 | Contig | 49 | 180,852 | 52.5 | SAMN10087170 | GCA_003904115 |
| 149 | 275798 | United Kingdom | 2016 | Patient | London | 4,829,821 | Contig | 82 | 178,420 | 52.5 | SAMN09520653 | GCA_003910765 |
| 150 | 584670 | United Kingdom | 2018 | Patient | London | 4,800,334 | Contig | 60 | 182,623 | 52.0 | SAMN10129726 | GCA_003917235 |
| 151 | 314896 | United Kingdom | 2016 | Patient | London | 4,778,571 | Contig | 90 | 192,887 | 52.0 | SAMN09268951 | GCA_004160915 |
| 152 | 404344 | United Kingdom | 2017 | Patient | London | 4,944,082 | Contig | 75 | 178,394 | 52.0 | SAMN09434938 | GCA_004179805 |
| 153 | 123891 | United Kingdom | 2015 | Patient | London | 4,695,436 | Contig | 109 | 83,605 | 52.0 | SAMN09444333 | GCA_004181195 |
| 154 | 194202 | United Kingdom | 2015 | Patient | London | 4,639,226 | Contig | 53 | 165,137 | 52.5 | SAMN09463345 | GCA_004183765 |
| 155 | 427525 | United Kingdom | 2017 | Patient | London | 4,805,406 | Contig | 67 | 149,546 | 52.0 | SAMN09476469 | GCA_004185305 |
| 156 | 557287 | United Kingdom | 2018 | Environment | London | 4,643,297 | Contig | 44 | 181,584 | 52.5 | SAMN09634575 | GCA_004256175 |
| 157 | 197024 | United Kingdom | 2015 | patient | London | 4,767,712 | Contig | 66 | 177,543 | 52.0 | SAMN09628796 | GCA_004256925 |
| 158 | 624492 | United Kingdom | 2018 | patient | London | 4,804,232 | Contig | 63 | 178,535 | 52.0 | SAMN10267064 | GCA_004258625 |
| 159 | 408629 | United Kingdom | 2017 | patient | London | 4,574,170 | Contig | 48 | 190,570 | 52.0 | SAMN09658685 | GCA_004268465 |
| 160 | CVM N17S367 | USA, SC | 2017 | Food, turkey | London | 4,851,959 | Complete Genome | 2 | 4,738,458 | 52.0 | SAMN10242831 | GCA_005549255 |
| 161 | HIY0015 | USA, HI | 2010 | Environment, municipal wastewater | London | 4,680,507 | Contig | 149 | 119,519 | 52.5 | SAMN11877229 | GCA_006227535 |
| 162 | HIY0010 | USA, HI | 2010 | Environment, municipal wastewater | London | 4,680,004 | Contig | 170 | 90,129 | 52.5 | SAMN11877226 | GCA_006227585 |
| 163 | CVM N18S0535 | USA, LA | 2018 | Food, turkey | London | 5,079,838 | Contig | 50 | 349,691 | 52.0 | SAMN11968024 | GCA_006341485 |
| 164 | CVM N18S0536 | USA, LA | 2018 | Food, turkey | London | 5,017,461 | Contig | 56 | 211,344 | 52.0 | SAMN11968025 | GCA_006341775 |
| 165 | HIY0234 | USA, HI | 2010 | Environment, municipal wastewater | London | 4,910,501 | Contig | 188 | 115,742 | 52.0 | SAMN11877396 | GCA_006378375 |
| 166 | HIY0240 | USA, HI | 2010 | Environment, municipal wastewater | London | 4,879,404 | Contig | 114 | 304,278 | 52.0 | SAMN11877399 | GCA_006378435 |
| 167 | FSIS11921620 | USA, SC | 2019 | Swine | London | 4,668,238 | Contig | 44 | 232,803 | 52.0 | SAMN12040784 | GCA_006429695 |
| 168 | FSIS11921160 | USA, TX | 2019 | Swine | London | 4,604,700 | Contig | 53 | 177,772 | 52.0 | SAMN11811357 | GCA_006752845 |
| 169 | 157329 | United Kingdom | 2015 | patient | London | 4,789,126 | Contig | 163 | 58,451 | 52.0 | SAMN09396939 | GCA_006976285 |
| 170 | 175575 | United Kingdom | 2015 | patient | London | 4,792,251 | Contig | 100 | 90,294 | 52.0 | SAMN09388664 | GCA_006977405 |
| 171 | 306469 | United Kingdom | 2016 | patient | London | 4,761,856 | Contig | 197 | 181,179 | 52.0 | SAMN09431395 | GCA_006978565 |
| 172 | 590883 | United Kingdom | 2018 | patient | London | 4,859,294 | Contig | 50 | 203,591 | 52.0 | SAMN10076063 | GCA_006984205 |
| 173 | 423905 | United Kingdom | 2017 | patient | London | 4,603,915 | Contig | 57 | 173,816 | 52.5 | SAMN09658752 | GCA_006987265 |
| 174 | 588885 | United Kingdom | 2018 | patient | London | 4,800,045 | Contig | 67 | 172,138 | 52.0 | SAMN10612393 | GCA_007115835 |
| 175 | 132003 | United Kingdom | 2015 | patient | London | 4,713,876 | Contig | 75 | 201,333 | 52.0 | SAMN09290538 | GCA_007150225 |
| 176 | 301617 | United Kingdom | 2016 | patient | London | 4,770,611 | Contig | 67 | 172,138 | 52.0 | SAMN09302498 | GCA_007151625 |
| 177 | 196404 | United Kingdom | 2015 | patient | London | 4,847,117 | Contig | 81 | 149,393 | 52.0 | SAMN09467958 | GCA_007217075 |
| 178 | 482153 | United Kingdom | 2018 | patient | London | 4,571,028 | Contig | 53 | 150,868 | 52.0 | SAMN09475797 | GCA_007221795 |
| 179 | HIY0391 | USA, HI | 2011 | Environment, sewage | London | 4,659,544 | Contig | 134 | 64,372 | 52.5 | SAMN05860106 | GCA_007231895 |
| 180 | 301889 | United Kingdom | 2016 | patient | London | 4,871,118 | Contig | 66 | 178,419 | 52.0 | SAMN09503873 | GCA_007240875 |
| 181 | 327157 | United Kingdom | 2016 | patient | London | 4,646,576 | Contig | 36 | 261,176 | 52.5 | SAMN09520962 | GCA_007247175 |
| 182 | 557288 | United Kingdom | 2018 | Environment | London | 4,641,423 | Contig | 48 | 162,114 | 52.5 | SAMN09634301 | GCA_007267305 |
| 183 | 267015 | United Kingdom | 2016 | - | London | 4,627,546 | Contig | 50 | 238,819 | 52.0 | SAMN09643848 | GCA_007272875 |
| 184 | 534809 | United Kingdom | 2018 | Environment | London | 4,635,760 | Contig | 49 | 146,118 | 52.5 | SAMN09652012 | GCA_007275415 |
| 185 | 587430 | United Kingdom | 2018 | patient | London | 4,798,284 | Contig | 64 | 175,737 | 52.0 | SAMN10067757 | GCA_007292985 |
| 186 | 587440 | United Kingdom | 2018 | patient | London | 4,618,384 | Contig | 49 | 181,902 | 52.0 | SAMN10068815 | GCA_007293855 |
| 187 | 587382 | United Kingdom | 2018 | patient | London | 4,801,785 | Contig | 64 | 181,748 | 52.0 | SAMN10076025 | GCA_007296435 |
| 188 | 201568 | United Kingdom | 2015 | patient | London | 4,799,977 | Contig | 68 | 131,030 | 52.0 | SAMN10080070 | GCA_007300295 |
| 189 | 617000 | United Kingdom | 2018 | patient | London | 4,805,166 | Contig | 59 | 188,729 | 52.0 | SAMN10229056 | GCA_007327875 |
| 190 | FSIS11814840 | USA, NC | 2018 | Swine | London | 4,630,669 | Contig | 57 | 154,907 | 52.5 | SAMN10261758 | GCA_007333455 |
| 191 | 623457 | United Kingdom | 2018 | patient | London | 4,801,655 | Contig | 55 | 181,752 | 52.0 | SAMN10267107 | GCA_007334845 |
| 192 | FSIS31801259 | USA, NC | 2018 | Food, pork | London | 4,620,584 | Contig | 55 | 152,398 | 52.5 | SAMN10440496 | GCA_007355355 |
| 193 | FSIS11815741 | USA, IL | 2018 | Food, turkey | London | 4,903,770 | Contig | 71 | 170,231 | 52.0 | SAMN10458810 | GCA_007355695 |
| 194 | 636368 | United Kingdom | 2018 | Other | London | 4,608,811 | Contig | 52 | 207,383 | 52.0 | SAMN10439011 | GCA_007356575 |
| 195 | FSIS11815734 | USA, IA | 2018 | Swine | London | 4,579,119 | Contig | 74 | 115,236 | 52.5 | SAMN10441531 | GCA_007357715 |
| 196 | FSIS11815910 | USA, PA | 2018 | Swine | London | 4,596,240 | Contig | 33 | 305,250 | 52.0 | SAMN10489812 | GCA_007359855 |
| 197 | 643162 | United Kingdom | 2018 | patient | London | 4,914,752 | Contig | 95 | 96,944 | 52.0 | SAMN10506082 | GCA_007363895 |
| 198 | 648604 | United Kingdom | 2018 | patient | London | 4,900,859 | Contig | 71 | 207,890 | 52.0 | SAMN10534806 | GCA_007368365 |
| 199 | 633447 | United Kingdom | 2018 | patient | London | 4,792,701 | Contig | 82 | 156,840 | 52.0 | SAMN10534811 | GCA_007368745 |
| 200 | 601661 | United Kingdom | 2018 | patient | London | 4,616,123 | Contig | 49 | 182,619 | 52.0 | SAMN10536551 | GCA_007370525 |
| 201 | FSIS11816352 | USA, CA | 2018 | Swine | London | 4,590,698 | Contig | 54 | 182,179 | 52.5 | SAMN10574795 | GCA_007374685 |
| 202 | 591808 | United Kingdom | 2018 | patient | London | 4,576,287 | Contig | 47 | 210,725 | 52.0 | SAMN10621835 | GCA_007382325 |
| 203 | 656772 | United Kingdom | 2018 | patient | London | 4,797,370 | Contig | 72 | 146,435 | 52.0 | SAMN10640709 | GCA_007384265 |
| 204 | 586005 | United Kingdom | 2018 | patient | London | 4,800,881 | Contig | 63 | 172,138 | 52.0 | SAMN10642476 | GCA_007385505 |
| 205 | FSIS31801370 | USA, IA | 2018 | Food, pork | London | 4,579,263 | Contig | 102 | 92,632 | 52.5 | SAMN10664413 | GCA_007388665 |
| 206 | FSIS11816922 | USA, MI | 2018 | Food, pork | London | 4,590,191 | Contig | 52 | 176,827 | 52.5 | SAMN10664174 | GCA_007389925 |
| 207 | FSIS21823053 | USA, NC | 2018 | Food, turkey | London | 4,785,073 | Contig | 77 | 119,035 | 52.5 | SAMN10690563 | GCA_007391625 |
| 208 | FSIS11816992 | USA, CA | 2018 | Food, pork | London | 4,598,697 | Contig | 73 | 134,177 | 52.5 | SAMN10821975 | GCA_007403865 |
| 209 | FSIS21923306 | USA, AR | 2019 | Food, turkey | London | 5,045,487 | Contig | 134 | 75,642 | 52.0 | SAMN10830487 | GCA_007409685 |
| 210 | 534811 | United Kingdom | 2018 | Environment | London | 4,638,530 | Contig | 47 | 181,584 | 52.5 | SAMN10835816 | GCA_007412505 |
| 211 | 493462 | United Kingdom | 2018 | patient | London | 4,828,518 | Contig | 79 | 128,014 | 52.0 | SAMN10867004 | GCA_007419405 |
| 212 | FSIS31901473 | USA, TN | 2019 | Food, pork | London | 4,611,857 | Contig | 37 | 201,519 | 52.5 | SAMN10835642 | GCA_007421365 |
| 213 | 393970 | United Kingdom | 2017 | patient | London | 4,683,702 | Contig | 52 | 234,266 | 52.0 | SAMN10907568 | GCA_007426445 |
| 214 | FSIS11917365 | USA, NC | 2019 | Food, turkey | London | 4,760,541 | Contig | 93 | 98,461 | 52.5 | SAMN10967882 | GCA_007428265 |
| 215 | FSIS11917543 | USA, TX | 2019 | Swine | London | 4,604,587 | Contig | 41 | 190,836 | 52.0 | SAMN10968467 | GCA_007429265 |
| 216 | FSIS11917771 | USA, MD | 2019 | Swine | London | 4,589,463 | Contig | 148 | 58,721 | 52.5 | SAMN10976945 | GCA_007429565 |
| 217 | 342522 | United Kingdom | 2017 | patient | London | 4,751,654 | Contig | 93 | 153,830 | 52.0 | SAMN11038729 | GCA_007433165 |
| 218 | FSIS11918008 | USA, IL | 2019 | Swine | London | 4,600,090 | Contig | 49 | 182,462 | 52.5 | SAMN11041598 | GCA_007433765 |
| 219 | FSIS11918296 | USA, IA | 2019 | Swine | London | 4,594,612 | Contig | 55 | 193,738 | 52.5 | SAMN11079909 | GCA_007439165 |
| 220 | FSIS11918665 | USA, NC | 2019 | Swine | London | 4,868,415 | Contig | 67 | 154,986 | 52.0 | SAMN11099165 | GCA_007442025 |
| 221 | FSIS11919215 | USA, CA | 2019 | Food, pork | London | 4,588,477 | Contig | 74 | 133,605 | 52.5 | SAMN11267695 | GCA_007443005 |
| 222 | FSIS11919423 | USA, NC | 2019 | Swine | London | 4,619,969 | Contig | 69 | 149,638 | 52.5 | SAMN11267727 | GCA_007443205 |
| 223 | FSIS11919519 | USA, NC | 2019 | Food, pork | London | 4,737,815 | Contig | 43 | 240,007 | 52.0 | SAMN11320667 | GCA_007443845 |
| 224 | FSIS11919520 | USA, VA | 2019 | Food, pork | London | 4,734,624 | Contig | 45 | 245,527 | 52.0 | SAMN11320668 | GCA_007443885 |
| 225 | FSIS11919658 | USA, NC | 2019 | Swine | London | 4,604,808 | Contig | 148 | 58,604 | 52.5 | SAMN11320803 | GCA_007444025 |
| 226 | FSIS11919872 | USA, OH | 2019 | Swine | London | 4,651,315 | Contig | 63 | 177,415 | 52.5 | SAMN11357613 | GCA_007444265 |
| 227 | FSIS11920781 | USA, IA | 2019 | Swine | London | 4,590,397 | Contig | 103 | 90,850 | 52.5 | SAMN11634760 | GCA_007444565 |
| 228 | FSIS11920525 | USA, MI | 2019 | Swine | London | 4,636,109 | Contig | 57 | 139,380 | 52.5 | SAMN11553522 | GCA_007444625 |
| 229 | FSIS11919892 | USA, NE | 2019 | Swine | London | 4,585,105 | Contig | 141 | 62,190 | 52.5 | SAMN11456350 | GCA_007445185 |
| 230 | FSIS11919197 | USA, IL | 2019 | Swine | London | 4,564,677 | Contig | 140 | 60,482 | 52.5 | SAMN11418561 | GCA_007445425 |
| 231 | FSIS11919202 | USA, SD | 2019 | Swine | London | 4,587,181 | Contig | 73 | 133,983 | 52.5 | SAMN11418566 | GCA_007445585 |
| 232 | FSIS11920338 | USA, OH | 2019 | Food, pork | London | 4,592,260 | Contig | 190 | 50,848 | 52.5 | SAMN11553482 | GCA_007445975 |
| 233 | FSIS11920998 | USA, NC | 2019 | Food, turkey | London | 4,943,829 | Contig | 57 | 152,646 | 52.0 | SAMN11637120 | GCA_007446205 |
| 234 | FSIS11920763 | USA, NC | 2019 | Swine | London | 4,619,199 | Contig | 58 | 161,999 | 52.5 | SAMN11637105 | GCA_007446225 |
| 235 | FSIS21924310 | USA, NC | 2019 | Food, pork | London | 4,666,571 | Contig | 125 | 72,788 | 52.5 | SAMN11634395 | GCA_007446765 |
| 236 | 238693 | United Kingdom | 2016 | patient | London | 4,764,781 | Contig | 99 | 84,267 | 52.0 | SAMN11086672 | GCA_007524705 |
| 237 | 160776 | United Kingdom | 2015 | patient | London | 4,601,877 | Contig | 284 | 28,468 | 52.5 | SAMN11102594 | GCA_007527545 |
| 238 | 7405 | United Kingdom | 2014 | Other | London | 4,710,449 | Contig | 142 | 56,444 | 52.0 | SAMN11157201 | GCA_007531265 |
| 239 | 709111 | United Kingdom | 2019 | patient | London | 4,742,382 | Contig | 85 | 123,819 | 52.0 | SAMN11261230 | GCA_007532905 |
| 240 | HIY0212 | USA, HI | 2010 | Environment, municipal wastewater | London | 4,977,842 | Scaffold | 120 | 346,294 | 52.0 | SAMN11877386 | GCA_007556875 |
| 241 | HIY0391 | USA, HI | 2011 | Environment, municipal wastewater | London | 4,690,163 | Scaffold | 139 | 115,083 | 52.5 | SAMN11877456 | GCA_007556965 |
| 242 | HIY0230 | USA, HI | 2010 | Environment, municipal wastewater | London | 4,975,961 | Scaffold | 162 | 113,906 | 52.0 | SAMN11877395 | GCA_007557295 |
| 243 | HIY0220 | USA, HI | 2010 | Environment, municipal wastewater | London | 5,393,164 | Scaffold | 327 | 133,937 | 51.5 | SAMN11877390 | GCA_007557455 |
| 244 | HIY0219 | USA, HI | 2010 | Environment, municipal wastewater | London | 4,885,790 | Scaffold | 146 | 162,528 | 52.0 | SAMN11877389 | GCA_007557475 |
| 245 | 465556 | United Kingdom | 2017 | patient | London | 4,771,997 | Contig | 106 | 104,695 | 52.0 | SAMN10867012 | GCA_007586935 |
| 246 | 371832 | United Kingdom | 2017 | patient | London | 4,750,112 | Contig | 77 | 149,394 | 52.0 | SAMN10959390 | GCA_007596275 |
| 247 | 279332 | United Kingdom | 2016 | patient | London | 4,610,253 | Contig | 66 | 130,780 | 52.0 | SAMN11052238 | GCA_007601575 |
| 248 | 167018 | United Kingdom | 2015 | patient | London | 4,637,879 | Contig | 59 | 173,263 | 52.5 | SAMN11102724 | GCA_007607255 |
| 249 | 107779 | United Kingdom | 2015 | patient | London | 4,694,556 | Contig | 128 | 76,115 | 52.0 | SAMN11149522 | GCA_007608615 |
| 250 | 720645 | United Kingdom | 2019 | patient | London | 4,802,207 | Contig | 49 | 203,509 | 52.0 | SAMN11400048 | GCA_007614015 |
| 251 | 722381 | United Kingdom | 2019 | patient | London | 4,834,395 | Contig | 67 | 155,162 | 52.0 | SAMN11474761 | GCA_007614415 |
| 252 | 534807 | United Kingdom | 2018 | Environment | London | 4,637,200 | Contig | 45 | 181,422 | 52.5 | SAMN10836082 | GCA_007653535 |
| 253 | 438788 | United Kingdom | 2017 | patient | London | 4,805,104 | Contig | 56 | 181,750 | 52.0 | SAMN10872193 | GCA_007656215 |
| 254 | 310042 | United Kingdom | 2016 | patient | London | 4,573,050 | Contig | 56 | 167,241 | 52.5 | SAMN11043726 | GCA_007668235 |
| 255 | 301672 | United Kingdom | 2016 | patient | London | 4,769,176 | Contig | 69 | 148,503 | 52.0 | SAMN11046553 | GCA_007668525 |
| 256 | 279555 | United Kingdom | 2016 | Environment | London | 4,760,860 | Contig | 65 | 207,372 | 52.0 | SAMN11052242 | GCA_007668945 |
| 257 | UNAM20171_Sa_AK67 | Mexico | 2017 | Food, beef | London | 4,602,046 | Contig | 184 | 50,381 | 52.5 | SAMN12345825 | GCA_007738755 |
| 258 | FSIS11920766 | USA, TN | 2019 | Swine | London | 4,591,804 | Contig | 124 | 71,943 | 52.5 | SAMN11860572 | GCA_007793135 |
| 259 | FSIS11921445 | USA, IA | 2019 | Food, pork | London | 4,711,451 | Contig | 44 | 250,179 | 52.0 | SAMN11940652 | GCA_007793995 |
| 260 | UNAM201744_Sa_AM50 | Mexico | 2017 | Food, beef | London | 4,610,594 | Contig | 138 | 64,640 | 52.5 | SAMN12745991 | GCA_008396495 |
| 261 | UNAM201740_Sa_AM47 | Mexico | 2017 | Food, beef | London | 4,652,556 | Contig | 96 | 100,610 | 52.0 | SAMN12745988 | GCA_008396555 |
| 262 | UNAM201743_Sa_AM49 | Mexico | 2017 | Food, beef | London | 4,611,893 | Contig | 122 | 77,306 | 52.5 | SAMN12745990 | GCA_008396655 |
| 263 | CVM N54285 | USA, PA | 2014 | Food, pork chop | London | 4,722,052 | Contig | 48 | 256,701 | 52.0 | SAMN03988391 | GCA_008403865 |
| 264 | FSIS1503203 | USA, TN | 2014 | Swine | London | 4,617,197 | Contig | 51 | 226,121 | 52.5 | SAMN03941001 | GCA_008403885 |
| 265 | FSIS1503566 | USA, MO | 2015 | Swine | London | 4,879,464 | Contig | 45 | 252,555 | 52.0 | SAMN04370489 | GCA_008406745 |
| 266 | FSIS1606277 | USA, TN | 2016 | Swine | London | 4,927,522 | Contig | 46 | 269,600 | 52.0 | SAMN04867491 | GCA_008413345 |
| 267 | FSIS1606923 | USA, KS | 2016 | Swine | London | 4,594,277 | Contig | 37 | 238,878 | 52.5 | SAMN05301299 | GCA_008426865 |
| 268 | FSIS1607183 | USA, OH | 2016 | Swine | London | 4,622,613 | Contig | 46 | 245,573 | 52.0 | SAMN05440709 | GCA_008428445 |
| 269 | PNUSAS009615 | USA | 2016 | Patient, urine | London | 4,654,489 | Contig | 31 | 354,113 | 52.0 | SAMN06625031 | GCA_008432065 |
| 270 | FSIS1710860 | USA, TN | 2017 | Swine | London | 4,612,311 | Contig | 33 | 245,474 | 52.5 | SAMN06603823 | GCA_008434725 |
| 271 | FSIS1703838 | USA, CA | 2017 | Food, pork | London | 4,655,408 | Contig | 44 | 201,435 | 52.0 | SAMN07563030 | GCA_008436085 |
| 272 | FSIS21720422 | USA, OH | 2017 | Food, pork | London | 4,615,040 | Contig | 45 | 201,435 | 52.5 | SAMN07819106 | GCA_008437665 |
| 273 | PNUSAS035307 | USA | 2017 | Patient, feces | London | 4,896,486 | Contig | 123 | 87,807 | 52.0 | SAMN08794909 | GCA_008440345 |
| 274 | FSIS11809395 | USA, IA | 2018 | Swine | London | 4,719,624 | Contig | 104 | 90,227 | 52.5 | SAMN09220808 | GCA_008443305 |
| 275 | FSIS11810442 | USA, KY | 2018 | Swine | London | 4,559,496 | Contig | 152 | 56,343 | 52.5 | SAMN09430579 | GCA_008446865 |
| 276 | FSIS11811106 | USA, NC | 2018 | Swine | London | 4,759,908 | Contig | 106 | 89,762 | 52.0 | SAMN09533158 | GCA_008450125 |
| 277 | FSIS11811390 | USA, MN | 2018 | Swine | London | 4,618,516 | Contig | 72 | 154,916 | 52.5 | SAMN09624572 | GCA_008450745 |
| 278 | FSIS11811673 | USA, OH | 2018 | Food, pork | London | 4,584,719 | Contig | 68 | 132,014 | 52.5 | SAMN09651409 | GCA_008451945 |
| 279 | FSIS31800771 | USA, NE | 2018 | Food, pork | London | 4,842,581 | Contig | 52 | 184,365 | 52.0 | SAMN09668439 | GCA_008453455 |
| 280 | FSIS31800778 | USA, TN | 2018 | Food, pork | London | 4,686,743 | Contig | 41 | 278,368 | 52.5 | SAMN09702896 | GCA_008454175 |
| 281 | CVM N17S347 | USA, SC | 2017 | Food, turkey | London | 5,098,154 | Complete Genome | 3 | 4,738,362 | 52.0 | SAMN09770933 | GCA_008457445 |
| 282 | CVM N17S110 | USA, LA | 2017 | Food, turkey | London | 4,750,481 | Contig | 32 | 380,034 | 52.0 | SAMN09770875 | GCA_008457525 |
| 283 | FSIS1605738 | USA, PA | 2016 | Swine | London | 4,588,861 | Contig | 50 | 203,634 | 52.0 | SAMN04530407 | GCA_008471165 |
| 284 | FSIS1606275 | USA, OH | 2016 | Swine | London | 4,620,285 | Contig | 39 | 349,454 | 52.0 | SAMN04867489 | GCA_008475405 |
| 285 | FSIS1606683 | USA, PA | 2016 | Swine | London | 4,592,781 | Contig | 34 | 305,250 | 52.0 | SAMN05163680 | GCA_008476205 |
| 286 | FSIS1607132 | USA, TN | 2016 | Food, pork | London | 4,596,530 | Contig | 41 | 237,595 | 52.0 | SAMN05413521 | GCA_008480485 |
| 287 | 2015AM-0730 | USA | 2015 | Patient, feces | London | 4,757,938 | Contig | 27 | 407,719 | 52.0 | SAMN07344383 | GCA_008487265 |
| 288 | FSIS1702038 | USA, IA | 2017 | Swine | London | 4,641,209 | Contig | 37 | 201,435 | 52.0 | SAMN07283942 | GCA_008487445 |
| 289 | FSIS31800330 | USA, TN | 2018 | Food, pork | London | 4,814,519 | Contig | 56 | 223,291 | 52.0 | SAMN08974770 | GCA_008491745 |
| 290 | FSIS11810190 | USA, IA | 2018 | Swine | London | 4,580,263 | Contig | 93 | 91,908 | 52.5 | SAMN09372570 | GCA_008496845 |
| 291 | FSIS11811396 | USA, NC | 2018 | Swine | London | 4,623,262 | Contig | 75 | 133,593 | 52.5 | SAMN09624578 | GCA_008500255 |
| 292 | FSIS11812178 | USA, ME | 2018 | Swine | London | 4,930,834 | Contig | 173 | 49,643 | 52.0 | SAMN09730270 | GCA_008503165 |
| 293 | FSIS11812158 | USA, NC | 2018 | Swine | London | 4,607,351 | Contig | 98 | 96,955 | 52.5 | SAMN09741913 | GCA_008504045 |
| 294 | CVM N17S109 | USA, LA | 2017 | Food, turkey | London | 4,746,456 | Contig | 48 | 161,984 | 52.0 | SAMN09770874 | GCA_008506385 |
| 295 | UNAM201737_Sa_AM45 | Mexico | 2017 | Food, beef | London | 4,615,819 | Contig | 228 | 40,097 | 52.5 | SAMN12745986 | GCA_008513415 |
| 296 | FSIS1605569 | USA, MO | 2016 | Swine | London | 4,927,512 | Contig | 43 | 303,228 | 52.0 | SAMN04510429 | GCA_008515015 |
| 297 | FSIS1605571 | USA, AL | 2016 | Swine | London | 4,750,221 | Contig | 53 | 226,174 | 52.0 | SAMN04510431 | GCA_008515075 |
| 298 | FSIS1605585 | USA, NC | 2016 | Swine | London | 4,619,601 | Contig | 41 | 245,494 | 52.5 | SAMN04489854 | GCA_008515765 |
| 299 | FSIS1606408 | USA, NC | 2016 | Swine | London | 4,927,501 | Contig | 62 | 284,775 | 52.0 | SAMN04942622 | GCA_008519985 |
| 300 | FSIS1606400 | USA, TN | 2016 | Swine | London | 4,590,102 | Contig | 39 | 305,250 | 52.0 | SAMN04942614 | GCA_008519995 |
| 301 | FSIS1606684 | USA, KS | 2016 | Swine | London | 4,669,177 | Contig | 40 | 305,251 | 52.0 | SAMN05163681 | GCA_008520575 |
| 302 | FSIS1606577 | USA, WI | 2016 | Swine | London | 4,619,708 | Contig | 34 | 245,474 | 52.0 | SAMN05176308 | GCA_008521665 |
| 303 | FSIS1606887 | USA, VA | 2016 | Swine | London | 4,591,393 | Contig | 30 | 238,861 | 52.5 | SAMN05274322 | GCA_008523825 |
| 304 | PNUSAS002865 | USA | 2015 | Patient, feces | London | 4,650,215 | Contig | 35 | 407,991 | 52.5 | SAMN05390825 | GCA_008524515 |
| 305 | FSIS1607115 | USA, OH | 2016 | Food, beef | London | 4,623,625 | Contig | 37 | 245,572 | 52.0 | SAMN05505557 | GCA_008524885 |
| 306 | FSIS1607047 | USA, AL | 2016 | Swine | London | 4,620,710 | Contig | 35 | 237,595 | 52.5 | SAMN05440608 | GCA_008525085 |
| 307 | PNUSAS009181 | USA | 2016 | Patient, feces | London | 4,616,549 | Contig | 34 | 211,344 | 52.0 | SAMN06475223 | GCA_008526895 |
| 308 | FSIS1700050 | USA, TN | 2017 | Swine | London | 4,634,094 | Contig | 43 | 186,251 | 52.5 | SAMN06624521 | GCA_008527865 |
| 309 | FSIS1702054 | USA, NC | 2017 | Swine | London | 4,781,953 | Contig | 55 | 245,526 | 52.0 | SAMN07283958 | GCA_008529975 |
| 310 | FSIS11704568 | USA, AL | 2017 | Swine | London | 4,618,176 | Contig | 42 | 237,592 | 52.0 | SAMN07738585 | GCA_008531255 |
| 311 | PNUSAS028807 | USA | 2017 | Patient, feces | London | 4,614,173 | Contig | 33 | 407,892 | 52.5 | SAMN08105034 | GCA_008532895 |
| 312 | FSIS11705339 | USA, MN | 2017 | Swine | London | 4,835,605 | Contig | 43 | 257,103 | 52.0 | SAMN08115115 | GCA_008532915 |
| 313 | FSIS11813923 | USA, MA | 2018 | Food, pork | London | 4,631,738 | Contig | 120 | 79,572 | 52.5 | SAMN10064125 | GCA_008537595 |
| 314 | FSIS11812982 | USA, IL | 2018 | Swine | London | 4,605,658 | Contig | 115 | 78,763 | 52.5 | SAMN09844504 | GCA_008540175 |
| 315 | FSIS11810645 | USA, IL | 2018 | Swine | London | 4,623,098 | Contig | 35 | 335,321 | 52.5 | SAMN09444128 | GCA_008549935 |
| 316 | FSIS11810844 | USA, PA | 2018 | Swine | London | 4,592,527 | Contig | 131 | 79,241 | 52.5 | SAMN09489538 | GCA_008550765 |
| 317 | FSIS11811954 | USA, CA | 2018 | Swine | London | 4,567,557 | Contig | 136 | 68,485 | 52.5 | SAMN09666601 | GCA_008555235 |
| 318 | FSIS11811398 | USA, OR | 2018 | Swine | London | 4,567,393 | Contig | 133 | 64,309 | 52.5 | SAMN09666582 | GCA_008555275 |
| 319 | 801404 | United Kingdom | 2019 | patient | London | 4,642,263 | Contig | 39 | 221,476 | 52.5 | SAMN12724520 | GCA_008557215 |
| 320 | 14101 | United Kingdom | - | patient | London | 4,557,896 | Contig | 213 | 40,286 | 52.0 | SAMN04364119 | GCA_008745135 |
| 321 | CVM N19S0502 | USA, MD | 2019 | Food, pork chop | London | 4,624,375 | Contig | 35 | 321,736 | 52.5 | SAMN12842985 | GCA_008759895 |
| 322 | CVM N19S0175 | USA, SC | 2019 | Food, pork chop | London | 4,627,457 | Contig | 28 | 405,166 | 52.0 | SAMN12842784 | GCA_008760375 |
| 323 | 806063 | United Kingdom | 2019 | patient | London | 4,802,576 | Contig | 56 | 192,527 | 52.0 | SAMN12868856 | GCA_008766435 |
| 324 | UNAM2018125_Sa_AN15 | Mexico | 2018 | Food, beef | London | 4,625,355 | Contig | 131 | 79,780 | 52.5 | SAMN12857426 | GCA_008779515 |
| 325 | UNAM201782_Sa_AM74 | Mexico | 2017 | Food, beef | London | 4,650,457 | Contig | 121 | 89,904 | 52.0 | SAMN12856891 | GCA_008785005 |
| 326 | UNAM201761_Sa_AM63 | Mexico | 2017 | Food, beef | London | 4,660,388 | Contig | 124 | 65,986 | 52.0 | SAMN12856889 | GCA_008786215 |
| 327 | 178649 | United Kingdom | 2015 | patient | London | 4,826,370 | Contig | 140 | 74,518 | 52.0 | SAMN04600183 | GCA_008875925 |
| 328 | 186598 | United Kingdom | 2015 | patient | London | 4,784,498 | Contig | 120 | 77,177 | 52.0 | SAMN04600157 | GCA_008876485 |
| 329 | 159866 | United Kingdom | 2015 | patient | London | 4,636,029 | Contig | 76 | 120,003 | 52.5 | SAMN04600556 | GCA_008877825 |
| 330 | 206731 | United Kingdom | 2016 | patient | London | 4,810,748 | Contig | 71 | 178,660 | 52.0 | SAMN04600594 | GCA_008878665 |
| 331 | 808785 | United Kingdom | 2019 | patient | London | 4,836,272 | Contig | 59 | 189,193 | 52.0 | SAMN12920419 | GCA_008901805 |
| 332 | CVM N18S1453 | USA, NC | 2018 | Food, pork chop | London | 4,625,849 | Contig | 40 | 256,702 | 52.5 | SAMN12930416 | GCA_008917785 |
| 333 | 19MN09PC10-2 | USA, MN | 2019 | Food, pork | London | 4,632,472 | Contig | 28 | 407,847 | 52.0 | SAMN13009003 | GCA_009002675 |
| 334 | 19MN09PC01 | USA, MN | 2019 | Food, pork chop | London | 4,627,092 | Contig | 66 | 145,384 | 52.5 | SAMN13008997 | GCA_009002795 |
| 335 | 806312 | United Kingdom | 2019 | patient | London | 4,938,674 | Contig | 55 | 183,623 | 52.0 | SAMN13013237 | GCA_009090225 |
| 336 | 19LA09GT05S1 | USA, LA | 2019 | Environment, animal feed | London | 4,743,112 | Contig | 99 | 93,411 | 52.0 | SAMN13025393 | GCA_009233805 |
| 337 | 335302 | United Kingdom | 2017 | patient | London | 4,580,420 | Contig | 57 | 178,421 | 52.0 | SAMN07180404 | GCA_009291425 |
| 338 | CFSAN077746 | USA | 2005 | Food | London | 4,549,893 | Contig | 43 | 237,592 | 52.5 | SAMN11191473 | GCA_009884595 |
| 339 | CFSAN077736 | USA | 2004 | Food | London | 4,577,501 | Contig | 41 | 235,009 | 52.5 | SAMN11191400 | GCA_009884605 |
| 340 | CFSAN077707 | USA | 2000 | Food, chicken | London | 4,578,159 | Contig | 42 | 237,592 | 52.5 | SAMN11191459 | GCA_009884635 |
| 341 | CFSAN077743 | USA | 2005 | Food | London | 4,577,913 | Contig | 41 | 237,592 | 52.5 | SAMN11191471 | GCA_009884655 |
| 342 | CFSAN077745 | USA | 2005 | Food | London | 4,666,313 | Contig | 50 | 245,481 | 52.0 | SAMN11191466 | GCA_009884695 |
| 343 | CFSAN077747 | USA | 2005 | Food | London | 4,578,219 | Contig | 46 | 215,441 | 52.5 | SAMN11191430 | GCA_009884855 |
| 344 | PNUSAS001911 | USA | 2007 | Patient, urine | London | 4,613,179 | Contig | 36 | 201,458 | 52.5 | SAMN04913859 | GCA_009999145 |
| 345 | FSIS1608562 | USA, SC | 2016 | Swine | London | 4,931,501 | Contig | 44 | 258,128 | 52.0 | SAMN06048878 | GCA_010000645 |
| 346 | FSIS1710354 | USA, SC | 2017 | Swine | London | 4,622,640 | Contig | 36 | 349,249 | 52.0 | SAMN06346647 | GCA_010371665 |
| 347 | FSIS1609710 | USA, CA | 2016 | Swine | London | 4,585,843 | Contig | 52 | 188,922 | 52.5 | SAMN06256220 | GCA_010371845 |
| 348 | FSIS1607973 | USA, WI | 2016 | Swine | London | 4,590,567 | Contig | 40 | 305,251 | 52.0 | SAMN05928268 | GCA_010374065 |
| 349 | FSIS11808103 | USA, TN | 2018 | Food, pork | London | 4,628,088 | Contig | 104 | 96,818 | 52.5 | SAMN08662341 | GCA_010379285 |
| 350 | FSIS1703184 | USA, CA | 2017 | Swine | London | 4,601,391 | Contig | 44 | 211,342 | 52.0 | SAMN07452781 | GCA_010380545 |
| 351 | FSIS1703839 | USA, NC | 2017 | Food, turkey | London | 4,747,668 | Contig | 57 | 161,911 | 52.0 | SAMN07563031 | GCA_010380945 |
| 352 | FSIS1701921 | USA, OH | 2017 | Food, pork | London | 4,623,490 | Contig | 35 | 245,530 | 52.0 | SAMN07249950 | GCA_010414485 |
| 353 | FSIS1609348 | USA, NC | 2016 | Food, turkey | London | 4,895,505 | Contig | 105 | 113,753 | 52.0 | SAMN06210386 | GCA_010427945 |
| 354 | FSIS31800325 | USA, NJ | 2018 | Food, chicken | London | 4,778,147 | Contig | 59 | 177,799 | 52.0 | SAMN08934991 | GCA_010429005 |
| 355 | FSIS1607965 | USA, NJ | 2016 | Swine | London | 4,627,130 | Contig | 54 | 210,914 | 52.0 | SAMN05928283 | GCA_010429865 |
| 356 | FSIS1703355 | USA, MA | 2017 | Swine | London | 4,621,304 | Contig | 40 | 211,341 | 52.5 | SAMN07450991 | GCA_010433115 |
| 357 | FSIS11705131 | USA, MI | 2017 | Food, pork | London | 4,601,119 | Contig | 68 | 136,367 | 52.5 | SAMN07955830 | GCA_010434145 |
| 358 | FSIS21820904 | USA, WI | 2017 | Food, pork | London | 4,840,793 | Contig | 159 | 63,022 | 52.0 | SAMN08329915 | GCA_010434695 |
| 359 | HIY0234 | USA, HI | 2010 | Environment, sewage | London | 4,870,437 | Contig | 128 | 77,578 | 52.0 | SAMN05860109 | GCA_010442035 |
| 360 | FSIS1709853 | USA, IL | 2016 | Swine | London | 4,594,751 | Contig | 31 | 305,250 | 52.0 | SAMN06271583 | GCA_010442415 |
| 361 | FSIS1700217 | USA, NC | 2017 | Swine | London | 4,598,019 | Contig | 37 | 267,806 | 52.0 | SAMN06824375 | GCA_010442765 |
| 362 | FSIS1608450 | USA, AR | 2016 | Food, turkey | London | 5,051,893 | Contig | 56 | 245,538 | 52.0 | SAMN06048859 | GCA_010442855 |
| 363 | FSIS21821363 | USA, TN | 2018 | Food, pork | London | 4,620,429 | Contig | 38 | 211,796 | 52.5 | SAMN08823053 | GCA_010442975 |
| 364 | FSIS21720134 | USA, WI | 2017 | Food, pork | London | 4,599,977 | Contig | 47 | 211,342 | 52.0 | SAMN07633157 | GCA_010449275 |
| 365 | FSIS11809559 | USA, NC | 2018 | Swine | London | 4,627,523 | Contig | 127 | 73,191 | 52.5 | SAMN09098757 | GCA_010452315 |
| 366 | FSIS1700192 | USA, IL | 2017 | Food, pork | London | 4,619,340 | Contig | 31 | 302,946 | 52.5 | SAMN06754686 | GCA_010454975 |
| 367 | FSIS11705674 | USA, MA | 2017 | Swine | London | 4,591,551 | Contig | 34 | 267,807 | 52.0 | SAMN08169388 | GCA_010458235 |
| 368 | FSIS1702225 | USA, OH | 2017 | Swine | London | 4,782,998 | Contig | 55 | 176,631 | 52.0 | SAMN07340470 | GCA_010472225 |
| 369 | PNUSAS013960 | USA | 2017 | Patient, feces | London | 4,621,692 | Contig | 30 | 273,347 | 52.5 | SAMN07190278 | GCA_010481355 |
| 370 | FSIS11704870 | USA, IL | 2017 | Swine | London | 4,567,043 | Contig | 120 | 64,309 | 52.5 | SAMN08028442 | GCA_010485455 |
| 371 | PNUSAS003236 | USA | 2016 | Patient, blood | London | 4,587,978 | Contig | 52 | 167,902 | 52.5 | SAMN05560548 | GCA_010499175 |
| 372 | FSIS11807715 | USA, PA | 2018 | Swine | London | 4,643,975 | Contig | 52 | 190,754 | 52.0 | SAMN08558118 | GCA_010502095 |
| 373 | FSIS11706002 | USA, PA | 2017 | Swine | London | 4,608,820 | Contig | 82 | 112,975 | 52.5 | SAMN08115150 | GCA_010506395 |
| 374 | FSIS1607297 | USA, IL | 2016 | Swine | London | 4,627,109 | Contig | 40 | 294,533 | 52.0 | SAMN05514402 | GCA_010508375 |
| 375 | FSIS1503204 | USA, IL | 2014 | Swine | London | 4,611,696 | Contig | 39 | 237,250 | 52.0 | SAMN03941002 | GCA_010510375 |
| 376 | FSIS11809788 | USA, OH | 2018 | Food, pork | London | 4,608,801 | Contig | 68 | 136,545 | 52.5 | SAMN09213702 | GCA_010511935 |
| 377 | PNUSAS004902 | USA | 2016 | Patient, feces | London | 4,591,859 | Contig | 41 | 211,344 | 52.0 | SAMN05936846 | GCA_010513695 |
| 378 | FSIS1609330 | USA, OH | 2016 | Food, pork | London | 4,590,354 | Contig | 42 | 201,447 | 52.0 | SAMN06174674 | GCA_010520685 |
| 379 | FSIS1710807 | USA, NC | 2017 | Food, turkey | London | 4,784,528 | Contig | 59 | 145,849 | 52.0 | SAMN06564441 | GCA_010526615 |
| 380 | FSIS11808702 | USA, OH | 2018 | Food, pork | London | 4,596,400 | Contig | 203 | 46,959 | 52.5 | SAMN08851662 | GCA_010526755 |
| 381 | FSIS1702359 | USA, NC | 2017 | Food, turkey | London | 4,654,927 | Contig | 29 | 289,137 | 52.0 | SAMN07312323 | GCA_010529435 |
| 382 | FSIS1609070 | USA, TN | 2016 | Food, pork | London | 4,607,519 | Contig | 28 | 401,165 | 52.0 | SAMN06128986 | GCA_010539445 |
| 383 | FSIS1608561 | USA, SC | 2016 | Swine | London | 4,900,607 | Contig | 153 | 88,748 | 52.0 | SAMN06103539 | GCA_010539915 |
| 384 | FSIS1607387 | USA, OK | 2016 | Swine | London | 4,891,057 | Contig | 68 | 211,344 | 52.0 | SAMN05596732 | GCA_010541605 |
| 385 | M152 | - | 2012 | - | London | 4,605,957 | Contig | 53 | 226,709 | 52.0 | SAMEA1711402 | GCA_010544305 |
| 386 | FSIS1609717 | USA, KY | 2016 | Swine | London | 4,589,818 | Contig | 44 | 224,392 | 52.0 | SAMN06256227 | GCA_010544465 |
| 387 | FSIS1609610 | USA, NY | 2016 | Food, beef | London | 4,618,138 | Contig | 32 | 302,877 | 52.5 | SAMN06256214 | GCA_010545445 |
| 388 | FSIS1504695 | USA, IL | 2015 | Swine | London | 4,620,617 | Contig | 34 | 349,774 | 52.5 | SAMN04217158 | GCA_010547615 |
| 389 | FSIS1609558 | USA, NJ | 2016 | Swine | London | 4,619,966 | Contig | 46 | 195,503 | 52.0 | SAMN06235213 | GCA_010549625 |
| 390 | FSIS1710879 | USA, CA | 2017 | Food, pork | London | 4,596,972 | Contig | 41 | 201,508 | 52.0 | SAMN06642017 | GCA_010551225 |
| 391 | FSIS1504209 | USA, FL | 2015 | Swine | London | 4,959,264 | Contig | 64 | 258,128 | 52.0 | SAMN04370509 | GCA_010551665 |
| 392 | FSIS1605652 | USA, NY | 2015 | Food, RTE Product | London | 4,629,772 | Contig | 32 | 280,389 | 52.0 | SAMN04461530 | GCA_010552165 |
| 393 | FSIS1700241 | USA, IL | 2017 | Food, pork | London | 4,624,811 | Contig | 37 | 307,641 | 52.0 | SAMN06761464 | GCA_010552445 |
| 394 | FSIS1700517 | USA, NC | 2017 | Food, pork | London | 4,632,782 | Contig | 44 | 232,768 | 52.0 | SAMN06847137 | GCA_010561065 |
| 395 | FSIS1700457 | USA, VA | 2017 | Food, pork | London | 4,730,419 | Contig | 39 | 245,502 | 52.0 | SAMN07141723 | GCA_010577525 |
| 396 | FSIS11809716 | USA, NC | 2018 | Swine | London | 4,623,638 | Contig | 50 | 167,160 | 52.5 | SAMN09098830 | GCA_010580385 |
| 397 | FSIS1703366 | USA, MS | 2017 | Food, chicken | London | 4,594,746 | Contig | 35 | 305,250 | 52.0 | SAMN07501500 | GCA_010589395 |
| 398 | FSIS21720156 | USA, WI | 2017 | Food, pork | London | 4,624,896 | Contig | 41 | 211,344 | 52.5 | SAMN07634163 | GCA_010602125 |
| 399 | FSIS21720439 | USA, NC | 2017 | Food, turkey | London | 4,775,924 | Contig | 53 | 172,763 | 52.0 | SAMN07829307 | GCA_010605925 |
| 400 | FSIS11705115 | USA, OH | 2016 | Food, pork | London | 4,631,128 | Contig | 48 | 190,836 | 52.5 | SAMN07955802 | GCA_010607125 |
| 401 | FSIS11706140 | USA, MD | 2017 | Swine | London | 4,621,131 | Contig | 36 | 267,806 | 52.0 | SAMN08182259 | GCA_010612785 |
| 402 | PNUSAS030240 | USA | 2017 | Patient, urine | London | 4,618,447 | Contig | 66 | 138,185 | 52.5 | SAMN08226222 | GCA_010614085 |
| 403 | FSIS1710091 | USA, NC | 2017 | Swine | London | 4,608,062 | Contig | 90 | 88,336 | 52.5 | SAMN06328261 | GCA_010618765 |
| 404 | FSIS11704697 | USA, WI | 2017 | Food, pork | London | 4,608,023 | Contig | 98 | 91,874 | 52.5 | SAMN07809344 | GCA_010627525 |
| 405 | FSIS11704777 | USA, CA | 2017 | Food, pork | London | 4,595,648 | Contig | 35 | 305,250 | 52.0 | SAMN08000928 | GCA_010653865 |
| 406 | FSIS11704877 | USA, OH | 2017 | Swine | London | 4,609,583 | Contig | 96 | 111,704 | 52.5 | SAMN08025061 | GCA_010658785 |
| 407 | PNUSAS002150 | USA | 2015 | Patient, feces | London | 4,801,330 | Contig | 35 | 219,565 | 52.0 | SAMN05170937 | GCA_010670165 |
| 408 | FSIS1608979 | USA, WI | 2016 | Food, pork | London | 4,593,166 | Contig | 32 | 305,250 | 52.0 | SAMN06140412 | GCA_010671405 |
| 409 | FSIS1609452 | USA, IL | 2016 | Food, pork | London | 4,595,094 | Contig | 43 | 186,420 | 52.0 | SAMN06189215 | GCA_010674945 |
| 410 | FSIS1609424 | USA, MI | 2016 | Food, pork | London | 4,605,593 | Contig | 77 | 161,843 | 52.5 | SAMN06210374 | GCA_010679385 |
| 411 | FSIS1608147 | USA, GA | 2016 | Food, pork | London | 4,626,898 | Contig | 43 | 229,115 | 52.0 | SAMN05965263 | GCA_010682775 |
| 412 | FSIS1710219 | USA, NJ | 2017 | Swine | London | 4,716,931 | Contig | 44 | 349,465 | 52.0 | SAMN06297963 | GCA_010683605 |
| 413 | FSIS1700225 | USA, PA | 2017 | Swine | London | 4,591,516 | Contig | 34 | 211,344 | 52.0 | SAMN06829515 | GCA_010684345 |
| 414 | FSIS1607536 | USA, TX | 2016 | Food, beef | London | 4,619,557 | Contig | 43 | 228,783 | 52.0 | SAMN05784378 | GCA_010689745 |
| 415 | FSIS1609440 | USA, AR | 2016 | Food, turkey | London | 4,758,657 | Contig | 41 | 245,564 | 52.5 | SAMN06189204 | GCA_010690585 |
| 416 | PNUSAS011494 | USA | 2016 | Patient, feces | London | 4,582,583 | Contig | 62 | 160,449 | 52.5 | SAMN06760148 | GCA_010691785 |
| 417 | FSIS1608230 | USA, WI | 2016 | Swine | London | 4,595,826 | Contig | 39 | 288,871 | 52.0 | SAMN06015778 | GCA_010692285 |
| 418 | FSIS1502792 | USA, IA | 2015 | Swine | London | 4,622,357 | Contig | 27 | 405,166 | 52.0 | SAMN04160883 | GCA_010716675 |
| 419 | FSIS1702360 | USA, MI | 2017 | Food, pork | London | 4,621,368 | Contig | 32 | 288,968 | 52.0 | SAMN07312324 | GCA_010717115 |
| 420 | FSIS1702458 | USA, NC | 2017 | Food, turkey | London | 5,056,445 | Contig | 64 | 211,879 | 52.0 | SAMN07327444 | GCA_010718475 |
| 421 | FSIS1702812 | USA, MO | 2017 | Swine | London | 4,601,082 | Contig | 49 | 267,806 | 52.0 | SAMN07349626 | GCA_010720255 |
| 422 | FSIS21720053 | USA, IN | 2017 | Food, pork | London | 4,872,817 | Contig | 52 | 177,731 | 52.0 | SAMN07568693 | GCA_010727745 |
| 423 | PNUSAS018680 | USA | 2017 | Patient, feces | London | 4,580,831 | Contig | 50 | 182,375 | 52.5 | SAMN07490572 | GCA_010728385 |
| 424 | FSIS11704281 | USA, NY | 2017 | Food, pork | London | 4,647,825 | Contig | 47 | 182,085 | 52.0 | SAMN07656068 | GCA_010729325 |
| 425 | PNUSAS003336 | USA | 2016 | Patient, urine | London | 4,619,973 | Contig | 62 | 139,498 | 52.5 | SAMN05558818 | GCA_010734295 |
| 426 | HIY0240 | USA, HI | 2010 | Environment, sewage | London | 4,865,684 | Contig | 70 | 118,226 | 52.0 | SAMN05860108 | GCA_010749185 |
| 427 | M151 | - | 2012 | - | London | 4,607,650 | Contig | 51 | 227,577 | 52.0 | SAMEA1711407 | GCA_010749755 |
| 428 | FSIS1710684 | USA, IL | 2017 | Food, pork | London | 4,623,347 | Contig | 40 | 232,143 | 52.0 | SAMN06602762 | GCA_010754675 |
| 429 | HIY0230 | USA, HI | 2010 | Environment, sewage | London | 4,947,426 | Contig | 130 | 64,246 | 52.0 | SAMN05860110 | GCA_010755395 |
| 430 | FSIS1608974 | USA, WI | 2016 | Food, pork | London | 4,624,394 | Contig | 37 | 189,424 | 52.5 | SAMN06124900 | GCA_010756035 |
| 431 | FSIS1710090 | USA, IA | 2016 | Swine | London | 4,613,353 | Contig | 50 | 176,687 | 52.5 | SAMN06307803 | GCA_010756555 |
| 432 | FSIS1608042 | USA, CA | 2016 | Swine | London | 4,593,804 | Contig | 42 | 245,549 | 52.0 | SAMN05964748 | GCA_010760175 |
| 433 | HIY0212 | USA, HI | 2010 | Environment, sewage | London | 4,964,437 | Contig | 82 | 104,957 | 52.0 | SAMN05860113 | GCA_010760365 |
| 434 | FSIS1607542 | USA, TN | 2016 | Swine | London | 4,927,621 | Contig | 58 | 203,470 | 52.0 | SAMN05784384 | GCA_010760655 |
| 435 | FSIS1607484 | USA, AL | 2016 | Swine | London | 4,877,034 | Contig | 46 | 245,538 | 52.0 | SAMN05720505 | GCA_010763155 |
| 436 | FSIS1608328 | USA, WA | 2016 | Food, pork | London | 4,918,046 | Contig | 79 | 176,702 | 52.0 | SAMN06016047 | GCA_010763335 |
| 437 | FSIS1700581 | USA, PA | 2017 | Swine | London | 4,628,245 | Contig | 33 | 269,490 | 52.0 | SAMN06899416 | GCA_010763635 |
| 438 | FSIS1701145 | USA, NC | 2017 | Food, turkey | London | 4,911,983 | Contig | 41 | 211,347 | 52.0 | SAMN07141752 | GCA_010764395 |
| 439 | FSIS11704906 | USA, CA | 2017 | Food, pork | London | 4,597,329 | Contig | 89 | 104,434 | 52.5 | SAMN07975081 | GCA_010773955 |
| 440 | FSIS11706997 | USA, WI | 2017 | Food, pork | London | 4,587,482 | Contig | 62 | 142,230 | 52.5 | SAMN08347859 | GCA_010778615 |
| 441 | PNUSAS034892 | USA | 2018 | Patient, feces | London | 4,616,633 | Contig | 42 | 177,772 | 52.5 | SAMN08668114 | GCA_010779295 |
| 442 | PNUSAS014970 | USA | 2017 | Patient, feces | London | 4,599,961 | Contig | 92 | 105,396 | 52.0 | SAMN07190304 | GCA_010781635 |
| 443 | FSIS11807367 | USA, TN | 2018 | Swine | London | 4,617,878 | Contig | 48 | 177,773 | 52.0 | SAMN08472587 | GCA_010783255 |
| 444 | FSIS1503894 | USA, WA | 2015 | Swine | London | 4,743,685 | Contig | 40 | 245,527 | 52.0 | SAMN04054236 | GCA_010795255 |
| 445 | CVM N19S0011 | USA, IA | 2019 | Food, turkey | London | 4,917,543 | Contig | 41 | 349,465 | 52.0 | SAMN12587188 | GCA_010878645 |
| 446 | 828249 | United Kingdom | 2019 | patient | London | 4,804,623 | Contig | 64 | 167,230 | 52.0 | SAMN13226640 | GCA_010881285 |
| 447 | 837015 | United Kingdom | 2019 | patient | London | 4,823,762 | Contig | 95 | 167,117 | 52.0 | SAMN13293498 | GCA_010919595 |
| 448 | FSIS1607276 | USA, NC | 2016 | Swine | London | 4,592,673 | Contig | 43 | 245,527 | 52.0 | SAMN05505610 | GCA_011105255 |
| 449 | HIY0015 | USA, HI | 2010 | Environment, sewage | London | 4,646,632 | Contig | 165 | 53,086 | 52.5 | SAMN05860114 | GCA_011107015 |
| 450 | FSIS1709963 | USA, TX | 2016 | Swine | London | 4,594,254 | Contig | 41 | 303,158 | 52.0 | SAMN06346641 | GCA_011113535 |
| 451 | FSIS1701098 | USA, IL | 2017 | Food, pork | London | 4,634,056 | Contig | 33 | 245,575 | 52.0 | SAMN07159205 | GCA_011117315 |
| 452 | PNUSAS028193 | USA | 2017 | Patient, feces | London | 4,744,741 | Contig | 109 | 105,332 | 52.5 | SAMN08043243 | GCA_011122235 |
| 453 | FSIS21720893 | USA, TN | 2017 | Food, pork | London | 4,625,997 | Contig | 41 | 186,799 | 52.5 | SAMN08321124 | GCA_011127575 |
| 454 | FSIS11705037 | USA, MI | 2017 | Food, pork | London | 4,617,265 | Contig | 70 | 132,539 | 52.5 | SAMN07843332 | GCA_011153495 |
| 455 | 274303 | United Kingdom | 2016 | patient | London | 4,843,877 | Contig | 101 | 133,284 | 52.0 | SAMN09009163 | GCA_011156195 |
| 456 | 412037 | United Kingdom | 2017 | patient | London | 4,638,408 | Contig | 43 | 182,910 | 52.5 | SAMN09076693 | GCA_011158815 |
| 457 | FSIS11809574 | USA, IL | 2018 | Swine | London | 4,605,555 | Contig | 50 | 182,462 | 52.5 | SAMN09098772 | GCA_011159715 |
| 458 | FSIS31700012 | USA, AR | 2017 | Food, chicken | London | 4,889,280 | Contig | 46 | 245,482 | 52.0 | SAMN08281260 | GCA_011169025 |
| 459 | CVM N19S0012 | USA, IA | 2019 | Food, turkey | London | 4,916,859 | Contig | 39 | 375,115 | 52.0 | SAMN12587189 | GCA_011182395 |
| 460 | CVM N18S1452 | USA, NC | 2018 | Food, pork chop | London | 4,626,620 | Contig | 34 | 395,506 | 52.5 | SAMN12587002 | GCA_011191015 |
| 461 | 880340 | United Kingdom | 2020 | patient | London | 4,940,549 | Contig | 93 | 135,088 | 52.0 | SAMN14052307 | GCA_011247295 |
| 462 | 850296 | United Kingdom | 2019 | patient | London | 4,825,594 | Contig | 91 | 203,470 | 52.0 | SAMN13506225 | GCA_011321055 |
| 463 | 879292 | United Kingdom | 2020 | patient | London | 4,765,921 | Contig | 52 | 182,474 | 52.0 | SAMN13961694 | GCA_011340665 |
| 464 | 880055 | United Kingdom | 2020 | patient | London | 4,897,377 | Contig | 106 | 121,967 | 52.0 | SAMN13991887 | GCA_011352425 |
| 465 | FSIS1710439 | USA, NC | 2017 | Food, pork | London | 4,717,704 | Contig | 47 | 349,465 | 52.0 | SAMN06368810 | GCA_011398435 |
| 466 | FSIS1609086 | USA, AR | 2016 | Food, turkey | London | 4,654,031 | Contig | 26 | 303,162 | 52.0 | SAMN06161169 | GCA_011399475 |
| 467 | FSIS1703316 | USA, CA | 2017 | Food, pork | London | 4,599,950 | Contig | 48 | 182,088 | 52.0 | SAMN07450977 | GCA_011400355 |
| 468 | FSIS11808633 | USA, PA | 2018 | Swine | London | 4,616,428 | Contig | 78 | 118,041 | 52.5 | SAMN08816102 | GCA_011401995 |
| 469 | PNUSAS018305 | USA | 2017 | Patient, feces | London | 4,668,462 | Contig | 26 | 307,640 | 52.0 | SAMN07424699 | GCA_011412335 |
| 470 | FSIS11705663 | USA, IL | 2017 | Swine | London | 4,703,235 | Contig | 40 | 211,487 | 52.5 | SAMN08272752 | GCA_011415795 |
| 471 | FSIS11705348 | USA, MI | 2017 | Swine | London | 4,608,075 | Contig | 97 | 89,677 | 52.5 | SAMN08114360 | GCA_011415895 |
| 472 | FSIS11809885 | USA, PA | 2018 | Swine | London | 4,620,227 | Contig | 46 | 201,457 | 52.0 | SAMN09213722 | GCA_011416475 |
| 473 | FSIS31800381 | USA, IL | 2018 | Food, pork | London | 4,601,484 | Contig | 35 | 245,581 | 52.0 | SAMN09068394 | GCA_011420715 |
| 474 | FSIS1609218 | USA, NJ | 2016 | Swine | London | 4,607,959 | Contig | 32 | 245,530 | 52.0 | SAMN06165754 | GCA_011428215 |
| 475 | FSIS1710716 | USA, WI | 2017 | Swine | London | 4,616,421 | Contig | 45 | 228,674 | 52.0 | SAMN06624558 | GCA_011432855 |
| 476 | 844953 | United Kingdom | 2019 | patient | London | 4,824,928 | Contig | 107 | 166,926 | 52.0 | SAMN13429388 | GCA_011473255 |
| 477 | 786565 | United Kingdom | 2019 | patient | London | 4,687,084 | Contig | 53 | 236,196 | 52.0 | SAMN12573784 | GCA_011635115 |
| 478 | FSIS22028099 | USA, WI | 2020 | Food, pork | London | 4,693,241 | Contig | 81 | 131,704 | 52.5 | SAMN14994180 | GCA_013148745 |
| 479 | FSIS32003594 | USA, WI | 2020 | Food, pork | London | 4,740,647 | Contig | 77 | 131,990 | 52.5 | SAMN15498558 | GCA_013499935 |
| 480 | FSIS12031712 | USA, WI | 2020 | Food, beef | London | 4,732,163 | Contig | 90 | 101,368 | 52.5 | SAMN15497637 | GCA_013502165 |
| 481 | FSIS32003569 | USA, WI | 2020 | Food, pork | London | 4,710,190 | Contig | 77 | 133,627 | 52.5 | SAMN15430991 | GCA_013567855 |
| 482 | FSIS12031639 | USA, TN | 2020 | Food, beef | London | 4,904,661 | Contig | 104 | 95,813 | 52.0 | SAMN15430283 | GCA_013568535 |
| 483 | FSIS12031617 | USA, WI | 2020 | Food, pork | London | 4,755,582 | Contig | 52 | 245,524 | 52.0 | SAMN15428869 | GCA_013569995 |
| 484 | FSIS12031649 | USA, MI | 2020 | Food, pork | London | 4,687,337 | Contig | 98 | 88,862 | 52.5 | SAMN15428836 | GCA_013571175 |
| 485 | FSIS12031388 | USA, NC | 2020 | Food, pork | London | 4,646,260 | Contig | 117 | 64,298 | 52.5 | SAMN15317639 | GCA_013680615 |
| 486 | FSIS22028314 | USA, WI | 2020 | Food, pork | London | 4,665,881 | Contig | 131 | 64,309 | 52.5 | SAMN15224357 | GCA_013719185 |
| 487 | FSIS22028320 | USA, IL | 2020 | Food, pork | London | 4,684,764 | Contig | 172 | 54,519 | 52.5 | SAMN15224363 | GCA_013720165 |
| 488 | FSIS12031256 | USA, NC | 2020 | Food, pork | London | 4,691,243 | Contig | 74 | 144,096 | 52.5 | SAMN15223731 | GCA_013720785 |
| 489 | FSIS12030242 | USA, TN | 2020 | Food, pork | London | 4,755,680 | Contig | 44 | 245,545 | 52.0 | SAMN15039924 | GCA_013801455 |
| 490 | FSIS12030244 | USA, IL | 2020 | Food, pork | London | 4,716,054 | Contig | 65 | 188,931 | 52.0 | SAMN15039926 | GCA_013802225 |
| 491 | FSIS12032046 | USA, WI | 2020 | Food, pork | London | 4,791,197 | Contig | 107 | 97,325 | 52.0 | SAMN15673143 | GCA_013915825 |
| 492 | FSIS12032059 | USA, WI | 2020 | Food, pork | London | 4,663,080 | Contig | 95 | 104,740 | 52.5 | SAMN15717258 | GCA_014052665 |
| 493 | FSIS12032270 | USA, NJ | 2020 | Food, pork | London | 4,672,019 | Contig | 48 | 183,022 | 52.0 | SAMN15776156 | GCA_014150565 |
| 494 | FSIS12032256 | USA, IA | 2020 | Swine | London | 4,694,450 | Contig | 65 | 177,771 | 52.5 | SAMN15776148 | GCA_014150825 |
| 495 | FSIS12032460 | USA, MI | 2020 | Swine | London | 4,747,392 | Contig | 41 | 218,756 | 52.0 | SAMN15824427 | GCA_014214155 |
| 496 | FSIS12032432 | USA, PA | 2020 | Swine | London | 4,957,037 | Contig | 97 | 102,474 | 52.0 | SAMN15851444 | GCA_014246575 |
| 497 | FSIS32003708 | USA, IL | 2020 | Food, pork | London | 4,699,523 | Contig | 87 | 96,912 | 52.5 | SAMN15867275 | GCA_014259245 |
| 498 | FSIS22029071 | USA, AL | 2020 | Food, pork | London | 4,644,786 | Contig | 142 | 58,586 | 52.5 | SAMN15894738 | GCA_014292575 |
| 499 | FSIS12032882 | USA, KY | 2020 | Food, pork | London | 4,665,166 | Contig | 109 | 90,241 | 52.5 | SAMN15948735 | GCA_014342355 |
| 500 | FSIS22029119 | USA, WI | 2020 | Food, pork | London | 4,699,013 | Contig | 100 | 90,374 | 52.5 | SAMN15947030 | GCA_014346565 |
| 501 | FSIS12032462 | USA, OH | 2020 | Swine | London | 4,703,972 | Contig | 67 | 162,156 | 52.5 | SAMN15824429 | GCA_014347935 |
| 502 | FSIS32003746 | USA, NC | 2020 | Food, pork | London | 4,628,431 | Contig | 135 | 57,568 | 52.5 | SAMN15950115 | GCA_014351155 |
| 503 | FSIS22028990 | USA, WI | 2020 | Food, pork | London | 4,656,230 | Contig | 134 | 73,187 | 52.5 | SAMN15860610 | GCA_014364105 |
| 504 | FSIS22028743 | USA, NC | 2020 | Food, pork | London | 4,666,600 | Contig | 156 | 58,558 | 52.5 | SAMN15698573 | GCA_014369745 |
| 505 | FSIS32003697 | USA, GA | 2020 | Food, pork | London | 4,824,609 | Contig | 59 | 182,051 | 52.0 | SAMN15927498 | GCA_014394925 |
| 506 | OH-1508113 | USA, OH | 2015 | Environment, meat bone meal | London | 4,665,325 | Contig | 94 | 100,758 | 52.5 | SAMN05721565 | GCA_014515705 |
| 507 | FSIS12030178 | USA, MA | 2020 | Food, pork | London | 4,757,388 | Contig | 83 | 113,538 | 52.0 | SAMN14739462 | GCA_014523375 |
| 508 | HA3-IN1 | China, Jiangsu, Huaian | 2016 | Swine feces | London | 4,922,946 | Complete Genome | 2 | 4,746,179 | 52.5 | SAMN15637151 | GCA_014524585 |
| 509 | HA1-SP5 | China, Jiangsu, Huaian | 2016 | Swine feces | London | 4,917,371 | Complete Genome | 3 | 4,747,268 | 52.5 | SAMN15637410 | GCA_014524605 |
| 510 | FSIS12033221 | USA, TN | 2020 | Swine | London | 4,698,991 | Contig | 108 | 79,196 | 52.5 | SAMN16113728 | GCA_014548505 |
| 511 | FSIS12033217 | USA, OH | 2020 | Food, beef | London | 4,668,604 | Contig | 123 | 71,751 | 52.5 | SAMN16113692 | GCA_014548525 |
| 512 | FSIS12033284 | USA, PA | 2020 | Food, pork | London | 4,666,587 | Contig | 125 | 71,233 | 52.5 | SAMN16113874 | GCA_014591255 |
| 513 | FSIS32003848 | USA, NJ | 2020 | Food, pork | London | 4,706,387 | Contig | 37 | 284,561 | 52.0 | SAMN16176663 | GCA_014598695 |
| 514 | FSIS12033253 | USA, TN | 2020 | Swine | London | 4,688,942 | Contig | 54 | 167,207 | 52.0 | SAMN16171041 | GCA_014599535 |
| 515 | 987720 | United Kingdom | 2020 | patient | London | 4,800,775 | Contig | 66 | 157,092 | 52.0 | SAMN16213254 | GCA_014666215 |
| 516 | FSIS12033530 | USA, OH | 2020 | Swine | London | 4,680,343 | Contig | 77 | 117,049 | 52.5 | SAMN16212896 | GCA_014668595 |
| 517 | FSIS12033643 | USA, IL | 2020 | Food, pork | London | 4,677,373 | Contig | 59 | 149,428 | 52.5 | SAMN16234071 | GCA_014680005 |
| 518 | FDA161495 | USA | 2002 | Food, shrimp | London | 4,658,430 | Contig | 77 | 131,698 | 52.0 | SAMN02843582 | GCA_014756165 |
| 519 | FDA143009-3 | USA | 2001 | Food, frozen spiny eel | London | 4,671,941 | Contig | 49 | 201,174 | 52.0 | SAMN02845048 | GCA_014758365 |
| 520 | FDA655140 | USA | 2010 | Environment, pet treat | London | 4,643,119 | Contig | 33 | 407,859 | 52.5 | SAMN02918770 | GCA_014758385 |
| 521 | FSIS22027842 | USA, TX | 2020 | Food, pork | London | 4,930,188 | Contig | 191 | 52,349 | 52.0 | SAMN14667969 | GCA_014760005 |
| 522 | FSIS12029968 | USA, MO | 2020 | Swine | London | 4,737,454 | Contig | 34 | 349,465 | 52.0 | SAMN14681085 | GCA_014760105 |
| 523 | FSIS12030058 | USA, IL | 2020 | Food, pork | London | 4,650,298 | Contig | 63 | 166,742 | 52.5 | SAMN14645676 | GCA_014760305 |
| 524 | FSIS22029288 | USA, WI | 2020 | Food, pork | London | 4,700,570 | Contig | 83 | 103,035 | 52.5 | SAMN16272219 | GCA_014767215 |
| 525 | FSIS12033772 | USA, IA | 2020 | Swine | London | 4,908,998 | Contig | 83 | 152,389 | 52.0 | SAMN16265449 | GCA_014769425 |
| 526 | FSIS32004039 | USA, NC | 2020 | Food, pork | London | 4,688,058 | Contig | 77 | 113,914 | 52.5 | SAMN16421015 | GCA_014913865 |
| 527 | FSIS12034310 | USA, AL | 2020 | Swine | London | 4,727,554 | Contig | 42 | 226,135 | 52.0 | SAMN16411145 | GCA_014917415 |
| 528 | FSIS12034312 | USA, NC | 2020 | Swine | London | 4,686,175 | Contig | 42 | 201,433 | 52.0 | SAMN16411143 | GCA_014917855 |
| 529 | FSIS32004051 | USA, FL | 2020 | Food, pork | London | 4,676,866 | Contig | 87 | 108,089 | 52.5 | SAMN16435501 | GCA_014929645 |
| 530 | FSIS22029426 | USA, TN | 2020 | Food, pork | London | 4,692,715 | Contig | 110 | 84,217 | 52.5 | SAMN16501964 | GCA_014979625 |
| 531 | FSIS32004098 | USA, NC | 2020 | Food, pork | London | 4,674,829 | Contig | 125 | 74,958 | 52.5 | SAMN16579450 | GCA_015054745 |
| 532 | FSIS12034176 | USA, MI | 2020 | Food, pork | London | 4,789,467 | Contig | 73 | 133,445 | 52.0 | SAMN16381021 | GCA_015090925 |
| 533 | FSIS12034869 | USA, TN | 2020 | Swine | London | 4,715,975 | Contig | 48 | 227,224 | 52.0 | SAMN16597182 | GCA_015173345 |
| 534 | FSIS12034606 | USA, PA | 2020 | Swine | London | 4,700,292 | Contig | 69 | 149,565 | 52.0 | SAMN16611404 | GCA_015178085 |
| 535 | FSIS12034690 | USA, WI | 2020 | Food, pork | London | 4,707,104 | Contig | 53 | 162,106 | 52.0 | SAMN16611412 | GCA_015178145 |
| 536 | FSIS22029332 | USA, NC | 2020 | Food, turkey | London | 4,897,346 | Contig | 54 | 211,344 | 52.0 | SAMN16351468 | GCA_015187585 |
| 537 | FSIS12034126 | USA, IA | 2020 | Food, pork | London | 4,695,853 | Contig | 141 | 64,309 | 52.5 | SAMN16320265 | GCA_015201105 |
| 538 | FSIS12035191 | USA, NC | 2020 | Food, turkey | London | 5,068,357 | Contig | 44 | 245,557 | 52.0 | SAMN16644482 | GCA_015225275 |
| 539 | FSIS12035375 | USA, OH | 2020 | Food, pork | London | 4,757,728 | Contig | 111 | 94,929 | 52.5 | SAMN16666777 | GCA_015238125 |
| 540 | FSIS22029489 | USA, NC | 2020 | Food, pork | London | 4,708,868 | Contig | 110 | 83,937 | 52.5 | SAMN16651017 | GCA_015242285 |
| 541 | FSIS12035336 | USA, NC | 2020 | Swine | London | 4,678,890 | Contig | 64 | 211,344 | 52.5 | SAMN16634421 | GCA_015243735 |
| 542 | CFSAN107176 | USA | 2015 | Food, beef | London | 4,867,416 | Contig | 71 | 201,202 | 52.0 | SAMN16812865 | GCA_015528205 |
| 543 | FSIS12035995 | USA, TN | 2020 | Food, pork | London | 4,681,129 | Contig | 122 | 72,025 | 52.5 | SAMN16984715 | GCA_015729425 |
| 544 | FSIS12036240 | USA, NC | 2020 | Swine | London | 4,736,811 | Contig | 34 | 353,804 | 52.0 | SAMN17079966 | GCA_016057835 |
| 545 | 2649 | Canada, Ontario, Ottawa | 1984 | Food, shrimp | London | 4,642,347 | Contig | 57 | 181,104 | 52.0 | SAMN14979482 | GCA_016096735 |
| 546 | 112 | USA, TX | 2016 | Swine, feces | London | 4,824,174 | Contig | 65 | 133,445 | 52 | SAMN10423897 | GCA_016105125 |
| 547 | 107 | USA, KS | 2016 | Swine, tissue pool | London | 5,096,617 | Contig | 102 | 131,329 | 52.0 | SAMN10423891 | GCA_016105305 |
| 548 | SA1385 | China, Shenzhen | 2016 | Food, pork | London | 4,856,919 | Scaffold | 192 | 228,772 | 52.0 | SAMN16986881 | GCA_016406855 |
| 549 | SA1376 | China, Shenzhen | 2016 | Food, pork | London | 4,819,657 | Scaffold | 216 | 238,510 | 52.0 | SAMN16986876 | GCA_016406935 |
| 550 | SA1317 | China, Shenzhen | 2016 | Food, pork | London | 4,816,962 | Scaffold | 146 | 228,772 | 52.5 | SAMN16986845 | GCA_016407775 |
| 551 | SA1305 | China, Shenzhen | 2016 | Food, pork | London | 4,938,921 | Scaffold | 275 | 225,978 | 52.0 | SAMN16986835 | GCA_016407945 |
| 552 | SA1306 | China, Shenzhen | 2016 | Food, pork | London | 4,788,842 | Contig | 61 | 279,510 | 52.0 | SAMN16986836 | GCA_016407985 |
| 553 | SA1270 | China, Shenzhen | 2016 | Food, pork | London | 4,753,100 | Contig | 45 | 345,268 | 52.0 | SAMN16986817 | GCA_016408165 |
| 554 | SA1260 | China, Shenzhen | 2016 | Food, pork | London | 4,889,946 | Scaffold | 254 | 228,731 | 52.0 | SAMN16986812 | GCA_016408245 |
| 555 | SA1248 | China, Shenzhen | 2016 | Food, pork | London | 4,823,676 | Scaffold | 191 | 201,269 | 52.0 | SAMN16986801 | GCA_016408465 |
| 556 | SA1209 | China, Shenzhen | 2016 | Food, beef | London | 4,994,823 | Scaffold | 295 | 228,772 | 52.0 | SAMN16986787 | GCA_016408785 |
| 557 | SA1179 | China, Shenzhen | 2016 | Food, pork | London | 4,664,151 | Contig | 42 | 406,246 | 52.0 | SAMN16986771 | GCA_016409095 |
| 558 | SA1082 | China, Shenzhen | 2016 | Food, chicken | London | 4,974,830 | Scaffold | 326 | 226,043 | 52.0 | SAMN16986728 | GCA_016409935 |
| 559 | SA967 | China, Shenzhen | 2016 | Food, pork | London | 4,800,985 | Scaffold | 114 | 226,043 | 52.0 | SAMN16986687 | GCA_016410765 |
| 560 | SA878 | China, Shenzhen | 2016 | Food, pork | London | 4,736,322 | Scaffold | 152 | 226,041 | 52.0 | SAMN16986665 | GCA_016411165 |
| 561 | SA792 | China, Shenzhen | 2016 | Food, pork | London | 4,721,582 | Contig | 45 | 406,245 | 52.0 | SAMN16986631 | GCA_016412065 |
| 562 | SA791 | China, Shenzhen | 2016 | Food, pork | London | 5,315,898 | Scaffold | 473 | 118,227 | 52.0 | SAMN16986630 | GCA_016412075 |
| 563 | SA683 | China, Shenzhen | 2015 | Food, pork | London | 4,967,161 | Scaffold | 290 | 228,732 | 52.0 | SAMN16986601 | GCA_016412665 |
| 564 | SA1860 | China, Shenzhen | 2017 | Food, pork | London | 4,825,272 | Scaffold | 270 | 228,740 | 52.0 | SAMN16987011 | GCA_016417885 |
| 565 | SA1843 | China, Shenzhen | 2017 | Food, pork | London | 4,793,649 | Contig | 50 | 349,329 | 52.0 | SAMN16987004 | GCA_016418085 |
| 566 | SA1792 | China, Shenzhen | 2017 | Food, pork | London | 4,814,911 | Contig | 139 | 226,205 | 52.0 | SAMN16986992 | GCA_016418305 |
| 567 | SA1790 | China, Shenzhen | 2017 | Food, pork | London | 4,823,609 | Contig | 141 | 225,411 | 52.0 | SAMN16986991 | GCA_016418315 |
| 568 | SA1692 | China, Shenzhen | 2016 | Food, chicken | London | 4,802,205 | Contig | 110 | 228,772 | 52.0 | SAMN16986971 | GCA_016418705 |
| 569 | SA1537 | China, Shenzhen | 2016 | Food, pork | London | 4,861,395 | Contig | 50 | 344,858 | 52.0 | SAMN16986929 | GCA_016419545 |
| 570 | SA1534 | China, Shenzhen | 2016 | Food, pork | London | 4,881,495 | Contig | 96 | 229,059 | 52.0 | SAMN16986926 | GCA_016419575 |
| 571 | SA1535 | China, Shenzhen | 2016 | Food, pork | London | 4,861,068 | Contig | 49 | 407,502 | 52.0 | SAMN16986927 | GCA_016419605 |
| 572 | SA1504 | China, Shenzhen | 2016 | Food, pork | London | 4,861,144 | Contig | 48 | 407,502 | 52.0 | SAMN16986917 | GCA_016419815 |
| 573 | SA543 | China, Shenzhen | 2015 | Food, pork | London | 4,970,790 | Scaffold | 323 | 203,812 | 52.0 | SAMN16986561 | GCA_016420855 |
| 574 | SA534 | China, Shenzhen | 2015 | Food, pork | London | 4,756,957 | Contig | 57 | 288,958 | 52.5 | SAMN16986558 | GCA_016420925 |
| 575 | SA531 | China, Shenzhen | 2015 | Food, pork | London | 4,996,586 | Scaffold | 352 | 225,147 | 52.0 | SAMN16986556 | GCA_016420975 |
| 576 | SA342 | China, Shenzhen | 2015 | Food, pork | London | 5,036,246 | Scaffold | 259 | 189,588 | 52.0 | SAMN16986497 | GCA_016422095 |
| 577 | SA284 | China, Shenzhen | 2015 | Food, pork | London | 4,891,090 | Scaffold | 192 | 229,584 | 52.0 | SAMN16986489 | GCA_016422345 |
| 578 | SA247 | China, Shenzhen | 2015 | Food, pork | London | 4,926,652 | Scaffold | 250 | 228,732 | 52.0 | SAMN16986479 | GCA_016422455 |
| 579 | SA236 | China, Shenzhen | 2015 | Food, pork | London | 4,919,786 | Scaffold | 234 | 229,060 | 52.0 | SAMN16986477 | GCA_016422555 |
| 580 | 14-Sa148 | China, Shenzhen | 2014 | Food, pork | London | 4,735,435 | Scaffold | 93 | 77,521 | 52.0 | SAMN16986448 | GCA_016423045 |
| 581 | 14-Sa128 | China, Shenzhen | 2014 | Food, pork | London | 4,832,910 | Scaffold | 189 | 226,255 | 52.0 | SAMN16986433 | GCA_016423345 |
| 582 | 14-Sa117 | China, Shenzhen | 2014 | Food, pork | London | 4,871,982 | Scaffold | 181 | 228,772 | 52.0 | SAMN16986427 | GCA_016423485 |
| 583 | 14-Sa76 | China, Shenzhen | 2014 | Food, pork | London | 4,778,537 | Contig | 58 | 287,486 | 52.0 | SAMN16986404 | GCA_016423855 |
| 584 | 14-Sa63 | China, Shenzhen | 2014 | Food, pork | London | 4,755,601 | Contig | 49 | 345,268 | 52.5 | SAMN16986399 | GCA_016423955 |
| 585 | 14-Sa48 | China, Shenzhen | 2014 | Food, pork | London | 4,738,526 | Scaffold | 55 | 89,762 | 52.0 | SAMN16986391 | GCA_016424165 |
| 586 | 14-Sa44 | China, Shenzhen | 2014 | Food, pork | London | 4,866,843 | Contig | 54 | 406,246 | 52.0 | SAMN16986390 | GCA_016424225 |
| 587 | 14-Sa31 | China, Shenzhen | 2014 | Food, pork | London | 4,868,495 | Scaffold | 206 | 243,855 | 52.0 | SAMN16986382 | GCA_016424335 |
| 588 | 13-Sa55 | China, Shenzhen | 2013 | Food, chicken | London | 4,893,606 | Contig | 84 | 344,858 | 52.0 | SAMN16986340 | GCA_016426665 |
| 589 | 13-Sa51 | China, Shenzhen | 2013 | Food, pork | London | 4,676,507 | Scaffold | 170 | 225,411 | 52.5 | SAMN16986336 | GCA_016426675 |
| 590 | 13-Sa50 | China, Shenzhen | 2013 | Food, chicken | London | 4,869,306 | Contig | 58 | 406,246 | 52.0 | SAMN16986335 | GCA_016426725 |
| 591 | 13-Sa42 | China, Shenzhen | 2013 | Food, pork | London | 4,928,981 | Scaffold | 255 | 225,411 | 52.0 | SAMN16986328 | GCA_016426825 |
| 592 | FSIS32004447 | USA, WI | 2020 | Food, pork | London | 4,726,905 | Contig | 88 | 106,207 | 52.0 | SAMN17176384 | GCA_016433425 |
| 593 | CVM 35153 | USA, NC | 2004 | Swine | London | 4,784,449 | Complete Genome | 2 | 4,682,076 | 52.0 | SAMN14504919 | GCA_016452025 |
| 594 | FSIS12036852 | USA, WI | 2020 | Food, pork | London | 4,773,476 | Contig | 61 | 182,168 | 52.0 | SAMN17191769 | GCA_016461245 |
| 595 | FSIS22030079 | USA, KY | 2020 | Food, pork | London | 4,658,135 | Contig | 161 | 53,131 | 52.5 | SAMN17198810 | GCA_016465735 |
| 596 | FSIS12036813 | USA, IL | 2020 | Swine | London | 4,689,092 | Contig | 88 | 94,964 | 52.5 | SAMN17298200 | GCA_016626505 |
| 597 | FSIS22130152 | USA, OH | 2020 | Food, pork | London | 4,812,480 | Contig | 45 | 306,833 | 52.0 | SAMN17284331 | GCA_016741615 |
| 598 | FSIS12137726 | USA, NC | 2021 | Swine | London | 4,809,439 | Contig | 129 | 64,309 | 52.5 | SAMN18027932 | GCA_016962815 |
| 599 | FSIS22130559 | USA, IL | 2021 | Food, pork | London | 4,685,283 | Contig | 41 | 237,595 | 52.0 | SAMN18027995 | GCA_016963095 |
| 600 | FSIS12137655 | USA, FL | 2021 | Food, pork | London | 4,686,381 | Contig | 66 | 162,671 | 52.5 | SAMN17974690 | GCA_016992715 |
| 601 | FSIS12137745 | USA, KS | 2021 | Food, pork | London | 4,694,749 | Contig | 42 | 238,882 | 52.0 | SAMN17900757 | GCA_017026715 |
| 602 | FSIS12137568 | USA, WI | 2021 | Swine | London | 4,654,872 | Contig | 86 | 121,065 | 52.5 | SAMN17868387 | GCA_017037015 |
| 603 | FSIS32104665 | USA, IL | 2021 | Food, pork | London | 4,836,968 | Contig | 114 | 81,334 | 52.0 | SAMN17833979 | GCA_017078455 |
| 604 | PNCS009600 | Canada | 2017 | Patient, feces | London | 4,738,690 | Contig | 47 | 354,296 | 52.0 | SAMN17808945 | GCA_017080115 |
| 605 | FSIS12137893 | USA, WI | 2021 | Swine | London | 4,704,256 | Contig | 131 | 62,222 | 52.0 | SAMN18052950 | GCA_017109785 |
| 606 | FSIS12137872 | USA, PA | 2021 | Swine | London | 4,692,039 | Contig | 80 | 134,198 | 52.5 | SAMN18052930 | GCA_017110245 |
| 607 | FSIS12137658 | USA, KS | 2021 | Food, chicken | London | 4,742,407 | Contig | 53 | 152,465 | 52.5 | SAMN17814243 | GCA_017121465 |
| 608 | FSIS12137643 | USA, WA | 2021 | Food, chicken | London | 4,633,601 | Contig | 176 | 51,596 | 52.5 | SAMN17814230 | GCA_017121765 |
| 609 | FSIS32104628 | USA, WI | 2021 | Food, pork | London | 4,675,267 | Contig | 119 | 74,769 | 52.5 | SAMN17715033 | GCA_017182555 |
| 610 | FSIS22130361 | USA, NC | 2021 | Food, pork | London | 4,710,399 | Contig | 135 | 64,579 | 52.5 | SAMN17619489 | GCA_017192195 |
| 611 | FSIS22130183 | USA, WI | 2021 | Food, pork | London | 4,729,064 | Contig | 152 | 58,443 | 52.0 | SAMN17515908 | GCA_017234915 |
| 612 | FSIS12138185 | USA, TN | 2021 | Swine | London | 4,652,884 | Contig | 123 | 73,152 | 52.5 | SAMN18114563 | GCA_017253475 |
| 613 | FSIS12138064 | USA, MI | 2021 | Swine | London | 4,793,434 | Contig | 143 | 58,942 | 52.5 | SAMN18098669 | GCA_017253615 |
| 614 | 1112419 | United Kingdom | 2021 | patient | London | 4,772,954 | Contig | 46 | 154,340 | 52.0 | SAMN18113639 | GCA_017265615 |
| 615 | PNCS003992 | Canada | 2017 | Patient, feces | London | 4,712,984 | Contig | 66 | 221,676 | 52.0 | SAMN18148670 | GCA_017363845 |
| 616 | FSIS12138450 | USA, VA | 2021 | Swine | London | 4,730,435 | Contig | 76 | 136,058 | 52.0 | SAMN18445850 | GCA_017576635 |
| 617 | FSIS12138380 | USA, GA | 2021 | Food, pork | London | 4,719,833 | Contig | 60 | 136,474 | 52.0 | SAMN18511327 | GCA_017606205 |
| 618 | FSIS22130943 | USA, TN | 2021 | Food, pork | London | 4,690,320 | Contig | 130 | 65,244 | 52.5 | SAMN18588124 | GCA_017712675 |
| 619 | FSIS12138868 | USA, AL | 2021 | Food, pork | London | 4,740,560 | Contig | 48 | 184,216 | 52.0 | SAMN18636685 | GCA_017817175 |
| 620 | FSIS12138907 | USA, NC | 2021 | Swine | London | 4,750,802 | Contig | 59 | 157,276 | 52.0 | SAMN18678387 | GCA_017894245 |
| 621 | FSIS12138983 | USA, KY | 2021 | Food, pork | London | 4,692,223 | Contig | 111 | 89,574 | 52.5 | SAMN18779596 | GCA_018077825 |
| 622 | PNCS006377 | Canada | 2018 | Patient, feces | London | 4,817,028 | Contig | 79 | 200,032 | 52.0 | SAMN18743310 | GCA_018188375 |
| 623 | PNCS003312 | Canada | 2017 | Patient, urine | London | 4,776,329 | Contig | 84 | 162,590 | 52.5 | SAMN18820681 | GCA_018216455 |
| 624 | FSIS12139404 | USA, PA | 2021 | Food, pork | London | 4,683,913 | Contig | 105 | 81,141 | 52.5 | SAMN18938125 | GCA_018229725 |
| 625 | PNCS004093 | Canada | 2017 | Patient, urine | London | 4,719,854 | Contig | 30 | 407,610 | 52.0 | SAMN18905951 | GCA_018298225 |
| 626 | PNCS004222 | Canada | 2017 | Patient, urine | London | 4,783,676 | Contig | 92 | 193,036 | 52.0 | SAMN18905966 | GCA_018298325 |
| 627 | CFSAN001081 | - | - | Environmental swab dry milk environment | London | 4,631,614 | Complete Genome | 1 | 4,631,614 | 52.5 | SAMN01816346 | GCA_018338335 |
| 628 | FSIS12139652 | USA, PA | 2021 | Swine | London | 4,768,259 | Contig | 65 | 177,771 | 52.0 | SAMN19118866 | GCA_018352615 |
| 629 | FSIS12139794 | USA, TN | 2021 | Swine | London | 4,679,102 | Contig | 123 | 64,309 | 52.5 | SAMN19288930 | GCA_018464245 |
| 630 | FSIS12139545 | USA, MI | 2021 | Swine | London | 4,674,515 | Contig | 51 | 152,566 | 52.0 | SAMN19118867 | GCA_018485185 |
| 631 | FSIS22131634 | USA, MI | 2021 | Food, pork | London | 4,901,273 | Contig | 165 | 64,043 | 52.5 | SAMN19659121 | GCA_018838335 |
| 632 | FSIS32105315 | USA, TN | 2021 | Food, pork | London | 4,660,012 | Contig | 104 | 77,136 | 52.5 | SAMN19960826 | GCA_019077665 |
| 633 | FSIS22131811 | USA, NC | 2021 | Food, pork | London | 4,645,132 | Contig | 222 | 38,863 | 52.5 | SAMN20023636 | GCA_019111545 |
| 634 | FSIS32105350 | USA, SC | 2021 | Food, beef | London | 4,668,800 | Contig | 106 | 88,588 | 52.5 | SAMN20066110 | GCA_019140615 |
| 635 | FSIS12140381 | USA, PA | 2021 | Swine | London | 4,650,376 | Contig | 146 | 53,259 | 52.5 | SAMN20034986 | GCA_019222665 |
| 636 | FSIS12141023 | USA, TN | 2021 | Swine | London | 4,723,172 | Contig | 71 | 133,905 | 52.0 | SAMN20297437 | GCA_019270655 |
| 637 | FSIS32105381 | USA, IL | 2021 | Food, pork | London | 4,695,615 | Contig | 102 | 97,285 | 52.5 | SAMN20299456 | GCA_019278235 |
| 638 | FSIS22132000 | USA, NC | 2021 | Food, pork | London | 4,739,892 | Contig | 50 | 200,112 | 52.0 | SAMN20304817 | GCA_019282975 |
| 639 | FSIS12141035 | USA, OH | 2021 | Swine | London | 4,666,624 | Contig | 52 | 211,342 | 52.0 | SAMN20350610 | GCA_019328705 |
| 640 | FSIS22132080 | USA, PA | 2021 | Food, pork | London | 4,642,066 | Contig | 126 | 64,309 | 52.5 | SAMN20398594 | GCA_019345725 |
| 641 | FSIS32105410 | USA, IL | 2021 | Food, pork | London | 4,679,640 | Contig | 142 | 63,523 | 52.5 | SAMN20434807 | GCA_019376495 |
| 642 | 440073 | United Kingdom | 2017 | patient | London | 4,973,744 | Contig | 69 | 162,736 | 52.0 | SAMN20606992 | GCA_019465635 |
| 643 | FSIS12141638 | USA, MN | 2021 | Food, pork | London | 4,946,919 | Contig | 210 | 55,963 | 52.0 | SAMN20771693 | GCA_019598405 |
| 644 | FSIS12141649 | USA, VA | 2021 | Swine | London | 4,654,032 | Contig | 166 | 50,879 | 52.5 | SAMN20771756 | GCA_019598445 |
| 645 | FSIS32105470 | USA, NC | 2021 | Food, pork | London | 4,736,001 | Contig | 66 | 174,520 | 52.0 | SAMN20835309 | GCA_019666985 |
| 646 | FSIS22132485 | USA, TN | 2021 | Food, pork | London | 4,756,537 | Contig | 69 | 142,504 | 52.0 | SAMN20875996 | GCA_019707615 |
| 647 | FSIS22132599 | USA, IL | 2021 | Food, pork | London | 4,638,976 | Contig | 249 | 35,333 | 52.5 | SAMN21038326 | GCA_019805265 |
| 648 | FSIS32105508 | USA, MI | 2021 | Food, pork | London | 4,799,474 | Contig | 41 | 257,102 | 52.0 | SAMN21040821 | GCA_019815825 |
| 649 | FSIS12142197 | USA, PA | 2021 | Swine | London | 4,659,064 | Contig | 151 | 58,596 | 52.5 | SAMN21122014 | GCA_019826285 |
| 650 | SAL-20-VL-NY-NCR-0046 | USA, NC | 2020 | Animal, Bos taurus | London | 4,689,271 | Contig | 25 | 443,096 | 52.0 | SAMN21215547 | GCA_019874225 |
| 651 | FSIS22132681 | USA, SC | 2021 | Food, beef | London | 4,668,645 | Contig | 101 | 89,924 | 52.5 | SAMN21250604 | GCA_019896715 |
| 652 | FSIS32105535 | USA, WI | 2021 | Food, pork | London | 4,786,755 | Contig | 128 | 76,800 | 52.0 | SAMN21250574 | GCA_019897035 |
| 653 | FSIS32105547 | USA, WI | 2021 | Food, pork | London | 4,628,482 | Contig | 202 | 50,859 | 52.5 | SAMN21363172 | GCA_019914745 |
| 654 | FSIS32105544 | USA, NC | 2021 | Food, pork | London | 4,743,205 | Contig | 110 | 93,365 | 52.5 | SAMN21363169 | GCA_019914785 |
| 655 | FSIS32105540 | USA, KY | 2021 | Food, pork | London | 4,709,005 | Contig | 141 | 64,309 | 52.5 | SAMN21363165 | GCA_019917005 |
| 656 | 1312804 | United Kingdom | 2021 | Animal | London | 4,674,714 | Contig | 57 | 188,682 | 52.0 | SAMN21396580 | GCA_019953275 |
| 657 | FSIS32105568 | USA, NC | 2021 | Food, pork | London | 4,839,690 | Contig | 63 | 139,596 | 52.0 | SAMN21418513 | GCA_019968135 |
| 658 | FSIS32105596 | USA, WI | 2021 | Food, pork | London | 4,685,547 | Contig | 108 | 96,271 | 52.5 | SAMN21462254 | GCA_020015035 |
| 659 | CDPH_CSalm361 | USA, California | 2014 | Patient | London | 4,669,798 | Contig | 55 | 237,595 | 52.0 | SAMN08412611 | GCA_020133405 |
| 660 | FSIS22105686 | USA, NC | 2021 | Food, pork | London | 4,706,978 | Contig | 119 | 83,508 | 52.5 | SAMN21976031 | GCA_020234525 |
| 661 | FSIS12143031 | USA, TN | 2021 | Food, pork | London | 4,668,307 | Contig | 160 | 59,356 | 52.5 | SAMN22228452 | GCA_020453505 |
| 662 | FSIS12106028 | USA, IA | 2021 | Food, pork | London | 4,694,965 | Contig | 130 | 66,534 | 52.0 | SAMN22426736 | GCA_020551605 |
| 663 | FSIS12105827 | USA, MA | 2021 | Food, beef | London | 4,822,221 | Contig | 57 | 167,112 | 52.0 | SAMN22428114 | GCA_020606335 |
| 664 | FSIS12106533 | USA, TX | 2021 | Swine | London | 4,708,643 | Contig | 72 | 154,910 | 52.0 | SAMN22822676 | GCA_020712875 |
| 665 | FSIS32106016 | USA, NC | 2021 | Food, pork | London | 4,664,903 | Contig | 74 | 132,831 | 52.5 | SAMN22867199 | GCA_020759775 |
| 666 | FSIS32106020 | USA, IL | 2021 | Food, pork | London | 4,708,506 | Contig | 109 | 70,447 | 52.0 | SAMN22867205 | GCA_020761275 |
| 667 | FSIS12106718 | USA, TN | 2021 | Swine | London | 4,622,366 | Contig | 196 | 47,288 | 52.5 | SAMN22984495 | GCA_020805145 |
| 668 | FSIS32106110 | USA, WI | 2021 | Food, beef | London | 4,872,972 | Contig | 88 | 134,591 | 52.0 | SAMN23235422 | GCA_020921515 |
| 669 | FSIS12106891 | USA, PA | 2021 | Swine | London | 4,749,538 | Contig | 70 | 133,524 | 52.0 | SAMN23416915 | GCA_020974225 |
| 670 | FSIS12107096 | USA, TN | 2021 | Swine | London | 4,696,436 | Contig | 136 | 66,224 | 52.5 | SAMN23492233 | GCA_021003215 |
| 671 | FSIS12107116 | USA, VA | 2021 | Swine | London | 4,691,021 | Contig | 55 | 196,253 | 52.5 | SAMN23494223 | GCA_021007255 |
| 672 | 1535074 | United Kingdom | 2021 | patient | London | 5,003,915 | Contig | 64 | 149,393 | 52.0 | SAMN23493203 | GCA_021013955 |
| 673 | FSIS12107282 | USA, SC | 2021 | Swine | London | 4,754,699 | Contig | 35 | 341,695 | 52.0 | SAMN23602595 | GCA_021058645 |
| 674 | FSIS12107475 | USA, MI | 2021 | Swine | London | 4,665,371 | Contig | 59 | 178,438 | 52.5 | SAMN24009677 | GCA_021181945 |
| 675 | FSIS22106491 | USA, WI | 2021 | Food, pork | London | 4,684,885 | Contig | 134 | 62,258 | 52.5 | SAMN24010544 | GCA_021183145 |
| 676 | FSIS32106245 | USA, NC | 2021 | Food, turkey | London | 4,813,973 | Contig | 132 | 65,798 | 52.5 | SAMN24036831 | GCA_021190115 |
| 677 | FSIS22106523 | USA, WI | 2021 | Food, pork | London | 4,671,320 | Contig | 185 | 52,184 | 52.5 | SAMN24146757 | GCA_021223665 |
| 678 | 1551400 | United Kingdom | 2021 | patient | London | 4,827,189 | Contig | 63 | 133,260 | 52.0 | SAMN24369633 | GCA_021280465 |
| 679 | FSIS22106670 | USA, OH | 2021 | Food, pork | London | 4,680,280 | Contig | 99 | 94,995 | 52.5 | SAMN24582844 | GCA_021347765 |
| 680 | FSIS12108018 | USA, NC | 2021 | Swine | London | 4,731,101 | Contig | 204 | 47,305 | 52.5 | SAMN24592036 | GCA_021349975 |
| 681 | FSIS12108003 | USA, WI | 2021 | Swine | London | 4,624,076 | Contig | 89 | 113,541 | 52.5 | SAMN24592218 | GCA_021351615 |
| 682 | FSIS12208138 | USA, KY | 2021 | Food, pork | London | 4,615,919 | Contig | 154 | 63,738 | 52.5 | SAMN24724766 | GCA_021400995 |
| 683 | FSIS12208140 | USA, OH | 2021 | Food, pork | London | 4,765,314 | Contig | 119 | 64,309 | 52.5 | SAMN24724762 | GCA_021401645 |
| 684 | FSIS12208210 | USA, TX | 2021 | Swine | London | 4,679,462 | Contig | 92 | 94,929 | 52.5 | SAMN24850165 | GCA_021450665 |
| 685 | FSIS12208257 | USA, PA | 2021 | Food, pork | London | 4,658,810 | Contig | 162 | 58,118 | 52.5 | SAMN25003583 | GCA_021488075 |
| 686 | 1561191 | United Kingdom | 2022 | Animal | London | 4,781,884 | Contig | 58 | 173,934 | 52.0 | SAMN25046088 | GCA_021505235 |
| 687 | FSIS12208702 | USA, GA | 2022 | Food, pork | London | 4,632,189 | Contig | 179 | 50,139 | 52.5 | SAMN25356267 | GCA_021755825 |
| 688 | FSIS32206453 | USA, OH | 2022 | Food, pork | London | 4,762,495 | Contig | 38 | 304,778 | 52.0 | SAMN25518057 | GCA_021758765 |
| 689 | FSIS12208841 | USA, OH | 2022 | Food, pork | London | 4,809,963 | Contig | 114 | 98,012 | 52.5 | SAMN25563182 | GCA_021867955 |
| 690 | FSIS12208837 | USA, FL | 2022 | Food, pork | London | 4,663,187 | Contig | 99 | 79,969 | 52.5 | SAMN25562926 | GCA_021868195 |
| 691 | FSIS12208915 | USA, MN | 2022 | Swine | London | 4,610,190 | Contig | 108 | 102,226 | 52.5 | SAMN25706920 | GCA_022046305 |
| 692 | 1576662 | United Kingdom | 2022 | patient | London | 4,662,537 | Contig | 57 | 149,393 | 52.0 | SAMN25943329 | GCA_022328765 |
| 693 | FSIS22206991 | USA, TX | 2022 | Food, pork | London | 4,606,470 | Contig | 254 | 35,095 | 52.5 | SAMN26011801 | GCA_022357135 |
| 694 | FSIS12209363 | USA, OH | 2022 | Swine | London | 4,725,958 | Contig | 91 | 126,916 | 52.5 | SAMN26179667 | GCA_022365375 |
| 695 | FSIS12209559 | USA, KS | 2022 | Swine | London | 4,697,582 | Contig | 83 | 96,909 | 52.0 | SAMN26310866 | GCA_022417975 |
| 696 | FSIS22207400 | USA, TN | 2022 | Food, pork | London | 4,689,800 | Contig | 88 | 110,824 | 52.5 | SAMN26732879 | GCA_022604995 |
| 697 | FSIS22207284 | USA, NC | 2022 | Food, pork | London | 4,681,853 | Contig | 84 | 104,042 | 52.5 | SAMN26732639 | GCA_022660115 |
| 698 | FSIS32206603 | USA, MI | 2022 | Food, pork | London | 5,182,219 | Contig | 134 | 84,426 | 52.0 | SAMN27156669 | GCA_022912655 |
| 699 | FSIS12210724 | USA, CA | 2022 | Swine | London | 4,638,822 | Contig | 167 | 54,573 | 52.5 | SAMN27522849 | GCA_022919555 |
| 700 | FSIS12210361 | USA, NC | 2022 | Food, pork | London | 4,656,030 | Contig | 119 | 64,403 | 52.5 | SAMN27059373 | GCA_022938995 |
| 701 | FSIS22207411 | USA, NC | 2022 | Food, pork | London | 4,648,320 | Contig | 166 | 54,600 | 52.5 | SAMN27016947 | GCA_022950195 |
| 702 | PNCS012792 | Canada | 2018 | Patient, feces | London | 4,949,987 | Contig | 49 | 349,465 | 52.0 | SAMN26795883 | GCA_022958715 |
| 703 | FSIS22207635 | USA, TN | 2022 | Food, pork | London | 4,748,571 | Contig | 62 | 177,773 | 52.0 | SAMN27582392 | GCA_022995025 |
| 704 | FSIS12210881 | USA, WI | 2022 | Food, pork | London | 4,687,515 | Contig | 100 | 96,975 | 52.5 | SAMN27603697 | GCA_023018405 |
| 705 | FSIS32206744 | USA, AR | 2022 | Food, turkey | London | 4,765,518 | Contig | 41 | 245,579 | 52.0 | SAMN27609569 | GCA_023020805 |
| 706 | FSIS12210816 | USA, IL | 2022 | Swine | London | 4,643,891 | Contig | 149 | 61,117 | 52.5 | SAMN27603975 | GCA_023045135 |
| 707 | FSIS12210901 | USA, WI | 2022 | Food, pork | London | 4,799,014 | Contig | 104 | 104,906 | 52.0 | SAMN27621014 | GCA_023046675 |
| 708 | FSIS12210914 | USA, TN | 2022 | Food, pork | London | 4,712,211 | Contig | 52 | 182,215 | 52.0 | SAMN27738504 | GCA_023092205 |
| 709 | FSIS22207813 | USA, NC | 2022 | Food, pork | London | 4,674,208 | Contig | 151 | 53,524 | 52.5 | SAMN27760304 | GCA_023102695 |
| 710 | FSIS12211126 | USA, NC | 2022 | Food, pork | London | 4,720,565 | Contig | 98 | 92,698 | 52.5 | SAMN27958117 | GCA_023179455 |
| 711 | FSIS22207875 | USA, NC | 2022 | Food, pork | London | 4,671,786 | Contig | 124 | 77,311 | 52.5 | SAMN27991097 | GCA_023193375 |
| 712 | FSIS32206832 | USA, WI | 2022 | Food, pork | London | 4,739,528 | Contig | 121 | 69,489 | 52.5 | SAMN28014413 | GCA_023201915 |
| 713 | FSIS12211399 | USA, IL | 2022 | Food, pork | London | 4,659,389 | Contig | 108 | 89,953 | 52.5 | SAMN28156590 | GCA_023282805 |
| 714 | FSIS12211275 | USA, NC | 2022 | Food, pork | London | 4,705,514 | Contig | 80 | 135,683 | 52.5 | SAMN28156556 | GCA_023282835 |
| 715 | FSIS12211276 | USA, WI | 2022 | Food, pork | London | 4,766,565 | Contig | 94 | 96,930 | 52.0 | SAMN28156557 | GCA_023282905 |
| 716 | FSIS12211411 | USA, IN | 2022 | Swine | London | 4,638,900 | Contig | 175 | 52,125 | 52.5 | SAMN28162717 | GCA_023289545 |
| 717 | FSIS12211505 | USA, PA | 2022 | Food, pork | London | 4,737,148 | Contig | 79 | 116,302 | 52.5 | SAMN28270498 | GCA_023373085 |
| 718 | FSIS22207412 | USA, TN | 2022 | Food, pork | London | 4,648,573 | Contig | 155 | 54,605 | 52.5 | SAMN27111441 | GCA_023408905 |
| 719 | FSIS22208100 | USA, WI | 2022 | Food, pork | London | 4,704,773 | Contig | 179 | 48,909 | 52.5 | SAMN28511914 | GCA_023493365 |
| 720 | FSIS12211625 | USA, OH | 2022 | Food, pork | London | 4,679,403 | Contig | 93 | 94,966 | 52.5 | SAMN28534923 | GCA_023502085 |
| 721 | FSIS32206973 | USA, OH | 2022 | Food, pork | London | 4,676,113 | Contig | 140 | 65,547 | 52.5 | SAMN28560699 | GCA_023526245 |
| 722 | FSIS12211729 | USA, PA | 2022 | Food, pork | London | 4,759,779 | Contig | 53 | 182,085 | 52.0 | SAMN28606652 | GCA_023529735 |
| 723 | FSIS12211732 | USA, TN | 2022 | Food, pork | London | 4,707,521 | Contig | 63 | 132,496 | 52.5 | SAMN28606775 | GCA_023531675 |
| 724 | FSIS12212105 | USA, OK | 2022 | Swine | London | 4,976,617 | Contig | 139 | 73,571 | 52.0 | SAMN28928442 | GCA_023759135 |
| 725 | FSIS22208339 | USA, PA | 2022 | Food, pork | London | 4,729,392 | Contig | 56 | 190,921 | 52.0 | SAMN28887260 | GCA_023763525 |
| 726 | FSIS12212000 | USA, IA | 2022 | Food, pork | London | 4,645,131 | Contig | 82 | 101,516 | 52.5 | SAMN28853405 | GCA_023769165 |
| 727 | FSIS12212650 | USA, IL | 2022 | Swine | London | 4,671,268 | Contig | 111 | 75,680 | 52.5 | SAMN29379383 | GCA_023967535 |
| 728 | FSIS12212453 | USA, NE | 2022 | Swine | London | 5,009,761 | Contig | 125 | 90,001 | 52.0 | SAMN29334912 | GCA_023985415 |
| 729 | FSIS12212533 | USA, WI | 2022 | Food, pork | London | 4,705,176 | Contig | 116 | 79,950 | 52.5 | SAMN29334901 | GCA_023985615 |
| 730 | FSIS12212500 | USA, NC | 2022 | Food, pork | London | 4,725,589 | Contig | 236 | 39,888 | 52.5 | SAMN29269646 | GCA_024000315 |
| 731 | FSIS22208684 | USA, TN | 2022 | Food, pork | London | 4,625,416 | Contig | 166 | 53,457 | 52.5 | SAMN29439888 | GCA_024095945 |
| 732 | FSIS12212636 | USA, NE | 2022 | Swine | London | 4,821,953 | Contig | 110 | 102,084 | 52.0 | SAMN29441656 | GCA_024099955 |
| 733 | FSIS12212101 | USA, TN | 2022 | Swine | London | 4,822,936 | Contig | 91 | 115,578 | 52.0 | SAMN28928433 | GCA_024108975 |
| 734 | FSIS22208825 | USA, IL | 2022 | Food, pork | London | 4,687,764 | Contig | 143 | 60,411 | 52.5 | SAMN29578168 | GCA_024189795 |
| 735 | FSIS12212887 | USA, WI | 2022 | Food, pork | London | 4,778,631 | Contig | 80 | 115,357 | 52.0 | SAMN29594671 | GCA_024195505 |
| 736 | R18.1595 | China, Taiwan | 2018 | Patient, feces | London | 4,836,323 | Complete Genome | 2 | 4,723,189 | 52.5 | SAMN29431228 | GCA_024266345 |
| 737 | FSIS12213271 | USA, PA | 2022 | Food, pork | London | 4,702,713 | Contig | 41 | 224,601 | 52.0 | SAMN29893581 | GCA_024396255 |
| 738 | FSIS12213255 | USA, TN | 2022 | Swine | London | 4,697,915 | Contig | 101 | 89,987 | 52.5 | SAMN29903047 | GCA_024415475 |
| 739 | FSIS22209167 | USA, RI | 2022 | Food, pork | London | 4,645,882 | Contig | 128 | 64,869 | 52.5 | SAMN30050959 | GCA_024525115 |
| 740 | FSIS22209168 | USA, GA | 2022 | Food, pork | London | 4,656,041 | Contig | 138 | 60,451 | 52.5 | SAMN30050963 | GCA_024525135 |
| 741 | FSIS22209259 | USA, TN | 2022 | Food, pork | London | 4,598,853 | Contig | 203 | 41,721 | 52.5 | SAMN30198512 | GCA_024596695 |
| 742 | FSIS12213846 | USA, WI | 2022 | Food, pork | London | 4,688,179 | Contig | 80 | 134,657 | 52.5 | SAMN30221122 | GCA_024611235 |
| 743 | FSIS32207502 | USA, IL | 2022 | Food, pork | London | 4,649,588 | Contig | 152 | 58,847 | 52.5 | SAMN30221529 | GCA_024658235 |
| 744 | FSIS12214507 | USA, NE | 2022 | Food, pork | London | 4,683,290 | Contig | 106 | 84,508 | 52.5 | SAMN30559740 | GCA_024820285 |
| 745 | FSIS32207648 | USA, TN | 2022 | Food, pork | London | 4,725,704 | Contig | 80 | 125,031 | 52.0 | SAMN30501198 | GCA_024858485 |
| 746 | FSIS12214226 | USA, WI | 2022 | Food, pork | London | 4,635,007 | Contig | 118 | 63,932 | 52.5 | SAMN30446339 | GCA_024890175 |
| 747 | FSIS12214266 | USA, IL | 2022 | Food, pork | London | 4,744,406 | Contig | 100 | 89,970 | 52.5 | SAMN30446279 | GCA_024890495 |
| 748 | FSIS22209494 | USA, WI | 2022 | Food, pork | London | 4,645,569 | Contig | 159 | 58,725 | 52.5 | SAMN30438408 | GCA_024893805 |
| 749 | FSIS22209496 | USA, OH | 2022 | Food, pork | London | 4,760,968 | Contig | 137 | 64,120 | 52.5 | SAMN30438410 | GCA_024893975 |
| 750 | FSIS12213472 | USA, TN | 2022 | Swine | London | 4,689,044 | Contig | 86 | 127,171 | 52.0 | SAMN30410574 | GCA_024907595 |
| 751 | FSIS12214072 | USA, PA | 2022 | Food, beef | London | 4,694,070 | Contig | 100 | 88,808 | 52.0 | SAMN30417142 | GCA_024908175 |
| 752 | FSIS32207685 | USA, NY | 2022 | Food, beef | London | 4,691,014 | Contig | 90 | 97,717 | 52.0 | SAMN30636175 | GCA_024933285 |
| 753 | FSIS12213901 | USA, OH | 2022 | Food, beef | London | 4,742,708 | Contig | 117 | 88,836 | 52.5 | SAMN30348492 | GCA_024967845 |
| 754 | FSIS32207684 | USA, NY | 2022 | Food, beef | London | 4,731,729 | Contig | 90 | 134,188 | 52.0 | SAMN30636174 | GCA_024991415 |
| 755 | FSIS12213754 | USA, TN | 2022 | Food, pork | London | 4,669,782 | Contig | 107 | 91,985 | 52.5 | SAMN30282433 | GCA_025022045 |
| 756 | MS170007 | Ireland | 2017 | patient | London | 5,030,485 | Contig | 68 | 207,407 | 52.0 | SAMEA101118418 | GCA_025080575 |
| 757 | FSIS32207838 | USA, TN | 2022 | Food, pork | London | 4,754,819 | Contig | 67 | 136,370 | 52.5 | SAMN31155695 | GCA_025574665 |
| 758 | FSIS22210093 | USA, IL | 2022 | Food, pork | London | 4,684,976 | Contig | 118 | 86,112 | 52.5 | SAMN31207848 | GCA_025619665 |
| 759 | FSIS22210103 | USA, IL | 2022 | Food, pork | London | 4,645,799 | Contig | 143 | 63,663 | 52.5 | SAMN31208405 | GCA_025620585 |
| 760 | N18-04674 | Canada | 2018 | Patient, feces | London | 4,916,758 | Complete Genome | 7 | 4,666,130 | 52.0 | SAMN20990803 | GCA_025643195 |
| 761 | FSIS12216083 | USA, IL | 2022 | Food, pork | London | 4,744,931 | Contig | 54 | 196,091 | 52.0 | SAMN31243133 | GCA_025648075 |
| 762 | FSIS12216082 | USA, TN | 2022 | Food, pork | London | 4,710,359 | Contig | 80 | 104,572 | 52.0 | SAMN31243132 | GCA_025650955 |
| 763 | FSIS22210116 | USA, OH | 2022 | Food, chicken | London | 4,682,085 | Contig | 161 | 55,573 | 52.5 | SAMN31228713 | GCA_025664195 |
| 764 | FSIS12216307 | USA, NC | 2022 | Food, pork | London | 4,639,272 | Contig | 248 | 32,732 | 52.5 | SAMN31328122 | GCA_025731055 |
| 765 | FSIS12216346 | USA, VA | 2022 | Food, pork | London | 4,744,849 | Contig | 62 | 139,596 | 52.5 | SAMN31319184 | GCA_025733275 |
| 766 | FSIS12216325 | USA, IA | 2022 | Food, pork | London | 5,196,962 | Contig | 104 | 108,022 | 52.0 | SAMN31319170 | GCA_025733455 |
| 767 | FSIS12216327 | USA, TN | 2022 | Food, pork | London | 4,703,164 | Contig | 72 | 156,680 | 52.0 | SAMN31319172 | GCA_025733515 |
| 768 | FSIS22210207 | USA, WI | 2022 | Food, pork | London | 4,661,660 | Contig | 137 | 64,192 | 52.5 | SAMN31313688 | GCA_025736735 |
| 769 | FSIS12216200 | USA, WI | 2022 | Food, pork | London | 4,678,710 | Contig | 107 | 80,089 | 52.5 | SAMN31329046 | GCA_025737135 |
| 770 | FSIS22210267 | USA, DE | 2022 | Food, beef | London | 4,636,304 | Contig | 204 | 43,825 | 52.5 | SAMN31370341 | GCA_025763975 |
| 771 | FSIS32207990 | USA, WI | 2022 | Food, pork | London | 4,664,667 | Contig | 57 | 190,625 | 52.0 | SAMN31494228 | GCA_025893895 |
| 772 | FSIS12216680 | USA, NC | 2022 | Swine | London | 4,863,252 | Contig | 49 | 188,931 | 52.0 | SAMN31573957 | GCA_025967745 |
| 773 | FSIS12216813 | USA, IL | 2022 | Food, pork | London | 4,670,883 | Contig | 120 | 79,921 | 52.5 | SAMN31577208 | GCA_025977925 |
| 774 | FSIS22210445 | USA, NC | 2022 | Food, pork | London | 4,704,112 | Contig | 114 | 70,689 | 52.5 | SAMN31577089 | GCA_025978485 |
| 775 | SAL03487 | China, Shandong | 2019 | Food, duck | London | 5,014,516 | Contig | 55 | 350,646 | 52.0 | SAMN27655558 | GCA_026052375 |
| 776 | FSIS12216906 | USA, KY | 2022 | Food, pork | London | 4,736,173 | Contig | 113 | 92,754 | 52.0 | SAMN31648083 | GCA_026054455 |
| 777 | FSIS12216979 | USA, TN | 2022 | Food, pork | London | 4,695,757 | Contig | 97 | 90,189 | 52.5 | SAMN31743372 | GCA_026187235 |
| 778 | FSIS12217135 | USA, NJ | 2022 | Swine | London | 4,675,288 | Contig | 172 | 53,259 | 52.5 | SAMN31744999 | GCA_026192295 |
| 779 | FSIS12217045 | USA, NC | 2022 | Food, pork | London | 4,753,341 | Contig | 39 | 245,528 | 52.0 | SAMN31747303 | GCA_026209675 |
| 780 | AUSMDU00029096 | Australia, Victoria | 2019 | Patient | London | 4,809,755 | Contig | 161 | 58,454 | 52.5 | SAMN31058389 | GCA_026290665 |
| 781 | FSIS12217398 | USA, NC | 2022 | Swine | London | 4,758,146 | Contig | 93 | 96,581 | 52.0 | SAMN31854509 | GCA_026370695 |
| 782 | FSIS22210921 | USA, WI | 2022 | Food, pork | London | 4,681,400 | Contig | 167 | 53,285 | 52.5 | SAMN31897122 | GCA_026484845 |
| 783 | FSIS12216073 | USA, KS | 2022 | Swine | London | 4,715,296 | Contig | 41 | 303,337 | 52.0 | SAMN31932659 | GCA_026531275 |
| 784 | FSIS22210906 | USA, IL | 2022 | Food, pork | London | 4,656,012 | Contig | 114 | 71,952 | 52.5 | SAMN31974139 | GCA_026578325 |
| 785 | FSIS32208251 | USA, TN | 2022 | Food, pork | London | 4,726,109 | Contig | 84 | 101,564 | 52.0 | SAMN32095725 | GCA_026734215 |
| 786 | FSIS32208299 | USA, TN | 2022 | Food, pork | London | 4,729,007 | Contig | 47 | 232,648 | 52.0 | SAMN32122552 | GCA_026769955 |
| 787 | FSIS32208337 | USA, TN | 2022 | Food, pork | London | 4,639,714 | Contig | 112 | 92,700 | 52.5 | SAMN32316687 | GCA_027099975 |
| 788 | FSIS32208303 | USA, MI | 2022 | Food, pork | London | 4,687,912 | Contig | 81 | 102,927 | 52.0 | SAMN32330356 | GCA_027148305 |
| 789 | FSIS12218213 | USA, IL | 2022 | Food, pork | London | 4,662,889 | Contig | 150 | 58,599 | 52.5 | SAMN32287349 | GCA_027173105 |
| 790 | FSIS22211192 | USA, PA | 2022 | Food, pork | London | 4,694,481 | Contig | 120 | 76,182 | 52.5 | SAMN32354144 | GCA_027241885 |
| 791 | FSIS22211187 | USA, OR | 2022 | Food, beef | London | 4,698,157 | Contig | 99 | 91,558 | 52.5 | SAMN32354136 | GCA_027242145 |
| 792 | FSIS12218322 | USA, NY | 2022 | Food, beef | London | 4,646,581 | Contig | 168 | 56,181 | 52.5 | SAMN32369946 | GCA_027265615 |
| 793 | FSIS22211275 | USA, TN | 2022 | Food, pork | London | 4,645,574 | Contig | 183 | 49,613 | 52.5 | SAMN32408202 | GCA_027306005 |
| 794 | FSIS12318704 | USA, MI | 2022 | Food, pork | London | 4,639,741 | Contig | 96 | 110,052 | 52.5 | SAMN32644631 | GCA_027902295 |
| 795 | FSIS12318848 | USA, IL | 2023 | Food, pork | London | 4,772,325 | Contig | 124 | 83,918 | 52.5 | SAMN32771591 | GCA_027918615 |
| 796 | FSIS12318753 | USA, NC | 2022 | Food, pork | London | 4,672,609 | Contig | 83 | 107,002 | 52.5 | SAMN32710260 | GCA_028014925 |
| 797 | FSIS12318932 | USA, SC | 2023 | Food, pork | London | 4,656,927 | Contig | 109 | 89,984 | 52.5 | SAMN32799918 | GCA_028036335 |
| 798 | FSIS32308519 | USA, NC | 2023 | Food, pork | London | 4,692,935 | Contig | 61 | 145,205 | 52.5 | SAMN32923124 | GCA_028173785 |
| 799 | FSIS32308576 | USA, NJ | 2023 | Food, pork | London | 4,698,860 | Contig | 110 | 91,032 | 52.5 | SAMN32944383 | GCA_028215855 |
| 800 | FSIS12319316 | USA, WI | 2023 | Food, pork | London | 4,684,514 | Contig | 117 | 74,950 | 52.5 | SAMN32961433 | GCA_028302325 |
| 801 | FSIS22311776 | USA, MI | 2023 | Food, pork | London | 4,800,922 | Contig | 183 | 49,674 | 52.5 | SAMN33020782 | GCA_028431225 |
| 802 | FSIS32308633 | USA, NC | 2023 | Food, pork | London | 4,879,518 | Contig | 67 | 188,080 | 52.0 | SAMN33057853 | GCA_028461285 |
| 803 | FSIS22311834 | USA, OH | 2023 | Food, pork | London | 4,667,809 | Contig | 167 | 52,230 | 52.5 | SAMN33141034 | GCA_028514205 |
| 804 | FSIS12319468 | USA, MO | 2023 | Swine | London | 4,885,177 | Contig | 126 | 69,323 | 52.0 | SAMN33185328 | GCA_028540185 |
| 805 | FSIS12319566 | USA, NC | 2023 | Food, pork | London | 4,687,286 | Contig | 119 | 66,270 | 52.5 | SAMN33227873 | GCA_028574675 |
| 806 | L1 | China, Hebei, Chengde | 2021 | Patient, leg | London | 4,790,749 | Complete Genome | 4 | 4,684,039 | 52.5 | SAMN33062111 | GCA_028623105 |
| 807 | F1 | China, Hebei, Chengde | 2021 | Patient, feet | London | 4,795,578 | Complete Genome | 2 | 4,793,690 | 52.5 | SAMN33061817 | GCA_028623125 |
| 808 | S1 | China, Hebei, Chengde | 2021 | Patient, feces | London | 4,797,561 | Complete Genome | 3 | 4,793,053 | 52.5 | SAMN33062119 | GCA_028623145 |
| 809 | FSIS12319849 | USA, TN | 2023 | Swine | London | 4,697,657 | Contig | 57 | 172,700 | 52.0 | SAMN33393708 | GCA_028762145 |
| 810 | FSIS12319720 | USA, MA | 2023 | Food, pork | London | 4,689,125 | Contig | 108 | 107,948 | 52.5 | SAMN33435136 | GCA_028862075 |
| 811 | FSIS12320048 | USA, AL | 2023 | Swine | London | 4,722,947 | Contig | 138 | 58,957 | 52.5 | SAMN33566897 | GCA_028957565 |
| 812 | FSIS12320253 | USA, MD | 2023 | Food, pork | London | 4,684,602 | Contig | 115 | 65,239 | 52.5 | SAMN33579330 | GCA_028997725 |
| 813 | FSIS12320315 | USA, TN | 2023 | Food, pork | London | 4,666,789 | Contig | 125 | 63,939 | 52.5 | SAMN33714509 | GCA_029173325 |
| 814 | FSIS32309009 | USA, NC | 2023 | Food, pork | London | 4,695,016 | Contig | 105 | 83,707 | 52.5 | SAMN33725371 | GCA_029188185 |
| 815 | FSIS12320451 | USA, WI | 2023 | Food, pork | London | 4,706,187 | Contig | 87 | 91,416 | 52.5 | SAMN33750302 | GCA_029216615 |
| 816 | FSIS12320401 | USA, MN | 2023 | Swine | London | 4,656,951 | Contig | 149 | 52,493 | 52.5 | SAMN33771726 | GCA_029221885 |
| 817 | FSIS12320449 | USA, CT | 2023 | Food, pork | London | 4,717,075 | Contig | 88 | 119,909 | 52.0 | SAMN33845196 | GCA_029334495 |
| 818 | FSIS12320522 | USA, WI | 2023 | Food, pork | London | 4,670,936 | Contig | 101 | 90,037 | 52.5 | SAMN33845215 | GCA_029337855 |
| 819 | FSIS32309125 | USA, MI | 2023 | Food, pork | London | 4,661,627 | Contig | 66 | 171,659 | 52.5 | SAMN33874134 | GCA_029376775 |
| 820 | FSIS32309117 | USA, CT | 2023 | Food, pork | London | 4,688,709 | Contig | 93 | 115,849 | 52.5 | SAMN33874107 | GCA_029376925 |
| 821 | FSIS22312505 | USA, IL | 2023 | Food, pork | London | 4,724,351 | Contig | 189 | 52,040 | 52.5 | SAMN34069907 | GCA_029588535 |
| 822 | FSIS22312495 | USA, TN | 2023 | Food, pork | London | 4,651,165 | Contig | 128 | 62,103 | 52.5 | SAMN34069899 | GCA_029590195 |
| 823 | FSIS32309232 | USA, OH | 2023 | Food, pork | London | 4,767,017 | Contig | 63 | 167,095 | 52.0 | SAMN34105530 | GCA_029617285 |
| 824 | FSIS12321089 | USA, KY | 2023 | Swine | London | 4,739,194 | Contig | 112 | 83,616 | 52.5 | SAMN34132689 | GCA_029663185 |
| 825 | FSIS32309317 | USA, WI | 2023 | Food, pork | London | 4,674,683 | Contig | 154 | 56,471 | 52.5 | SAMN34236254 | GCA_029832895 |
| 826 | DY6 | China, Zhejiang | 2017 | Patient, blood | London | 4,779,432 | Contig | 49 | 407,502 | 52.0 | SAMN35449685 | GCA_030231945 |
| 827 | JX6 | China, Zhejiang, Jiaxing | 2018 | Patient, blood | London | 4,771,515 | Contig | 42 | 306,946 | 52.0 | SAMN35449748 | GCA_030232905 |
| 828 | DY33 | China, Zhejiang | 2021 | Patient, blood | London | 4,714,221 | Contig | 33 | 407,502 | 52.0 | SAMN35449664 | GCA_030233545 |
| 829 | DY29 | China, Zhejiang | 2021 | Patient, blood | London | 4,718,313 | Contig | 37 | 407,502 | 52.0 | SAMN35449660 | GCA_030233605 |
| 830 | DY28 | China, Zhejiang | 2021 | Patient, blood | London | 4,774,147 | Contig | 47 | 349,330 | 52.5 | SAMN35449659 | GCA_030233665 |
| 831 | FSIS12321347 | USA, TX | 2023 | Food, pork | London | 4,841,403 | Contig | 114 | 92,674 | 52.5 | SAMN34290757 | GCA_030887305 |
| 832 | FSIS12321269 | USA, MD | 2023 | Food, pork | London | 4,632,337 | Contig | 127 | 64,299 | 52.5 | SAMN34251274 | GCA_030904675 |
| 833 | FSIS22314161 | USA, WI | 2023 | Food, pork | London | 4,688,559 | Contig | 129 | 64,864 | 52.5 | SAMN37344618 | GCA_031326525 |
| 834 | FSIS22314150 | USA, NE | 2023 | Food, pork | London | 4,654,745 | Contig | 154 | 57,094 | 52.5 | SAMN37344534 | GCA_031326705 |
| 835 | S198 | China | 2020 | Swine, feces | London | 4,859,733 | Scaffold | 74 | 433,092 | 52.0 | SAMN36403383 | GCA_031344555 |
| 836 | FSIS12322963 | USA, TN | 2023 | Swine | London | 4,722,442 | Contig | 91 | 131,698 | 52.0 | SAMN36073102 | GCA_031450655 |
| 837 | FSIS12322334 | USA, TN | 2023 | Food, pork | London | 4,768,092 | Contig | 42 | 268,529 | 52.0 | SAMN35559323 | GCA_031485835 |
| 838 | FSIS22314266 | USA, TN | 2023 | Food, pork | London | 4,678,953 | Contig | 97 | 97,009 | 52.5 | SAMN37442717 | GCA_031658835 |
| 839 | FSIS12323769 | USA, NJ | 2023 | Food, pork | London | 4,651,450 | Contig | 98 | 89,764 | 52.5 | SAMN36717173 | GCA_031776855 |
| 840 | FSIS22314272 | USA, WI | 2023 | Food, pork | London | 4,627,258 | Contig | 112 | 74,258 | 52.5 | SAMN37500827 | GCA_031894395 |
| 841 | FSIS22313738 | USA, NC | 2023 | Food, pork | London | 4,565,397 | Contig | 236 | 38,505 | 52.5 | SAMN36843554 | GCA_031916825 |
| 842 | FSIS12322366 | USA, OH | 2023 | Food, pork | London | 4,641,736 | Contig | 114 | 72,577 | 52.5 | SAMN35624080 | GCA_032206265 |
| 843 | FSIS12325276 | USA, NE | 2023 | Food, pork | London | 4,859,467 | Contig | 65 | 156,275 | 52.0 | SAMN37588127 | GCA_032235255 |
| 844 | FSIS12325278 | USA, WI | 2023 | Food, pork | London | 4,750,809 | Contig | 47 | 245,530 | 52.0 | SAMN37588129 | GCA_032235275 |
| 845 | FSIS22312732 | USA, NC | 2023 | Food, pork | London | 4,691,859 | Contig | 128 | 74,180 | 52.5 | SAMN34387768 | GCA_032277205 |
| 846 | FSIS12323832 | USA, IL | 2023 | Food, pork | London | 4,655,814 | Contig | 114 | 83,604 | 52.5 | SAMN36745643 | GCA_032323075 |
| 847 | FSIS32310214 | USA, WI | 2023 | Food, pork | London | 4,959,248 | Contig | 106 | 115,472 | 52.0 | SAMN37668570 | GCA_032382575 |
| 848 | FSIS22313605 | USA, NJ | 2023 | Food, pork | London | 4,647,830 | Contig | 136 | 57,233 | 52.5 | SAMN36676422 | GCA_032414305 |
| 849 | FSIS12323597 | USA, WI | 2023 | Food, pork | London | 4,688,290 | Contig | 136 | 62,385 | 52.5 | SAMN36673285 | GCA_032422665 |
| 850 | FSIS12325502 | USA, IA | 2023 | Swine | London | 4,698,650 | Contig | 33 | 307,119 | 52.5 | SAMN37692571 | GCA_032498515 |
| 851 | FSIS12323388 | USA, TN | 2023 | Food, pork | London | 4,704,764 | Contig | 44 | 193,617 | 52.0 | SAMN36416733 | GCA_032528445 |
| 852 | FSIS22314528 | USA, NC | 2023 | Food, pork | London | 4,659,450 | Contig | 190 | 45,273 | 52.5 | SAMN37796825 | GCA_032605315 |
| 853 | FSIS12322992 | USA, TN | 2023 | Food, pork | London | 4,683,809 | Contig | 44 | 193,894 | 52.0 | SAMN36000187 | GCA_032681865 |
| 854 | FSIS12322960 | USA, NC | 2023 | Swine | London | 4,781,744 | Contig | 49 | 182,190 | 52.0 | SAMN35999227 | GCA_032683045 |
| 855 | FSIS32310381 | USA, NC | 2023 | Food, pork | London | 4,808,509 | Contig | 87 | 110,153 | 52.0 | SAMN37810061 | GCA_032697385 |
| 856 | FSIS12321481 | USA, PA | 2023 | Food, beef | London | 4,709,904 | Contig | 110 | 89,455 | 52.5 | SAMN34406654 | GCA_032756915 |
| 857 | PNCS017501 | Canada | - | - | London | 4,676,148 | Contig | 89 | 94,984 | 52.5 | SAMN35795159 | GCA_032773595 |
| 858 | FSIS32310416 | USA, IA | 2023 | Food, pork | London | 4,948,530 | Contig | 42 | 404,449 | 52.0 | SAMN37887715 | GCA_032872075 |
| 859 | FSIS32310417 | USA, WI | 2023 | Food, pork | London | 4,983,143 | Contig | 46 | 245,537 | 52.0 | SAMN37887714 | GCA_032872175 |
| 860 | AUSMDU00045728 | Australia, Victoria | 2020 | Patient, feces | London | 4,926,421 | Contig | 85 | 97,230 | 52.0 | SAMN37820954 | GCA_032928115 |
| 861 | AUSMDU00044217 | Australia, Victoria | 2020 | Patient, feces | London | 4,756,803 | Contig | 111 | 87,227 | 52.5 | SAMN37820905 | GCA_032932655 |
| 862 | FSIS22314600 | USA, OH | 2023 | Food, beef | London | 4,668,016 | Contig | 144 | 64,944 | 52.5 | SAMN37909540 | GCA_032940915 |
| 863 | FSIS32310418 | USA, MN | 2023 | Food, pork | London | 4,853,717 | Contig | 50 | 211,103 | 52.0 | SAMN37931598 | GCA_032980465 |
| 864 | FSIS12322281 | USA, NC | 2023 | Swine | London | 4,672,808 | Contig | 35 | 245,582 | 52.0 | SAMN35529558 | GCA_033015595 |
| 865 | FSIS12325776 | USA, TX | 2023 | Food, pork | London | 4,639,458 | Contig | 119 | 74,648 | 52.5 | SAMN37981057 | GCA_033040015 |
| 866 | FSIS22312957 | USA, TN | 2023 | Food, pork | London | 4,738,646 | Contig | 171 | 52,406 | 52.5 | SAMN35365104 | GCA_033051895 |
| 867 | FSIS22312950 | USA, WI | 2023 | Food, pork | London | 4,796,005 | Contig | 232 | 38,848 | 52.5 | SAMN35329477 | GCA_033353715 |
| 868 | FSIS22312941 | USA, MI | 2023 | Food, pork | London | 4,614,818 | Contig | 158 | 54,567 | 52.5 | SAMN35329063 | GCA_033356355 |
| 869 | FSIS32309564 | USA, NC | 2023 | Food, pork | London | 4,698,122 | Contig | 85 | 162,043 | 52.0 | SAMN35165494 | GCA_033508435 |
| 870 | PNCS017500 | Canada | 2023 | Patient, feces | London | 4,739,597 | Contig | 33 | 294,638 | 52.0 | SAMN35010537 | GCA_033674885 |
| 871 | PNCS017499 | Canada | 2023 | Patient, feces | London | 4,681,668 | Contig | 46 | 294,546 | 52.0 | SAMN35010536 | GCA_033674905 |
| 872 | FSIS12321764 | USA, TN | 2023 | Swine | London | 4,750,753 | Contig | 104 | 87,100 | 52.5 | SAMN35000581 | GCA_033687905 |
| 873 | FSIS32309460 | USA, TN | 2023 | Food, pork | London | 4,660,887 | Contig | 86 | 103,093 | 52.5 | SAMN34998530 | GCA_033690895 |
| 874 | FSIS32309444 | USA, NC | 2023 | Food, pork | London | 4,689,746 | Contig | 73 | 152,528 | 52.5 | SAMN34492071 | GCA_033764395 |
| 875 | FSIS12326456 | USA, IL | 2023 | Swine | London | 4,722,573 | Contig | 40 | 201,428 | 52.5 | SAMN38300522 | GCA_033818455 |
| 876 | FSIS12326765 | USA, WI | 2023 | Food, pork | London | 4,657,755 | Contig | 178 | 52,371 | 52.5 | SAMN38514488 | GCA_034017925 |
| 877 | FSIS12326782 | USA, NC | 2023 | Swine | London | 4,699,359 | Contig | 37 | 279,045 | 52.0 | SAMN38639727 | GCA_034077105 |
| 878 | SEBC65B | Mexico | 2019 | Environment, farm maternity bed | London | 4,671,779 | Contig | 41 | 478,611 | 52.0 | SAMN37443271 | GCA_034423655 |
| 879 | SETLX55C | Mexico | 2019 | Patient, feces | London | 4,669,035 | Contig | 47 | 288,006 | 52.0 | SAMN37443270 | GCA_034423675 |
| 880 | FSIS12327145 | USA, MI | 2023 | Food, pork | London | 4,645,592 | Contig | 183 | 49,746 | 52.5 | SAMN38924813 | GCA_034484505 |
| 881 | FSIS12327297 | USA, NC | 2023 | Swine | London | 4,726,084 | Contig | 46 | 303,161 | 52.0 | SAMN39126350 | GCA_034648475 |
| 882 | FSIS32309364 | USA, NE | 2023 | Food, pork | London | 4,726,344 | Contig | 121 | 79,676 | 52.5 | SAMN34310423 | GCA_034689425 |
| 883 | FSIS32309354 | USA, IL | 2023 | Food, pork | London | 4,672,324 | Contig | 125 | 73,890 | 52.5 | SAMN34310376 | GCA_034689705 |
| 884 | FSIS12327420 | USA, WI | 2023 | Animal,Dairy | London | 4,772,959 | Contig | 41 | 245,485 | 52.0 | SAMN39224193 | GCA_034983385 |
| 885 | FSIS12327383 | USA, GA | 2023 | Food, pork | London | 4,711,779 | Contig | 40 | 404,451 | 52.0 | SAMN39224134 | GCA_035092005 |
| 886 | FSIS12327491 | USA, TN | 2023 | Food, pork | London | 4,835,893 | Contig | 45 | 245,496 | 52.0 | SAMN39273522 | GCA_035233305 |
| 887 | A132 | China, Zhejiang, Huzhou | 2023 | patient | London | 4,829,066 | Complete Genome | 3 | 4,708,192 | 52.5 | SAMN39131366 | GCA_035319905 |
| 888 | FSIS12427802 | USA, OH | 2024 | Swine | London | 4,708,120 | Contig | 53 | 201,365 | 52.0 | SAMN39532559 | GCA_035965655 |
| 889 | FSIS12427894 | USA, NC | 2023 | Food, pork | London | 4,787,114 | Contig | 32 | 353,804 | 52.0 | SAMN39598621 | GCA_036127655 |
| 890 | SAL-23-VL-SD-IA-0027 | USA, NC | 2023 | Swine | London | 4,748,434 | Contig | 55 | 285,027 | 52.0 | SAMN39724450 | GCA_036462055 |
| 891 | FSIS22415432 | USA, NC | 2024 | Food, pork | London | 4,649,575 | Contig | 124 | 87,090 | 52.5 | SAMN39945327 | GCA_036624585 |
| 892 | FSIS32410862 | USA, OH | 2024 | Food, pork | London | 4,664,685 | Contig | 145 | 61,951 | 52.5 | SAMN39967337 | GCA_036686945 |
| 893 | KTS.20.051.TP.THY | Viet Nam, Ho Chi Minh city | 2021 | Food, pork | London | 4,974,572 | Contig | 133 | 229,342 | 52.0 | SAMN33222207 | GCA_036958505 |
| 894 | KTS.20.167.P.NL | Viet Nam, Dong Nai | 2022 | Swine feces | London | 5,095,831 | Contig | 157 | 209,928 | 52.0 | SAMN33222202 | GCA_036958585 |
| 895 | KTS.20.163.P.NL | Viet Nam, Dong Nai | 2022 | Swine feces | London | 5,097,103 | Contig | 167 | 160,774 | 52.0 | SAMN33222201 | GCA_036958625 |
| 896 | 14-191 | Viet Nam, Ho Chi Minh city | 2014 | Food, pork | London | 5,007,899 | Contig | 366 | 53,266 | 52.0 | SAMN33222159 | GCA_036960045 |
| 897 | FSIS22415569 | USA, CA | 2024 | Food, pork | London | 4,825,528 | Contig | 48 | 188,922 | 52.0 | SAMN40252007 | GCA_036988405 |
| 898 | FSIS22415639 | USA, NE | 2024 | Food, pork | London | 4,660,375 | Contig | 152 | 64,309 | 52.5 | SAMN40526142 | GCA_037259805 |
| 899 | FSIS22415633 | USA, FL | 2024 | Food, pork | London | 4,729,540 | Contig | 83 | 94,926 | 52.0 | SAMN40632139 | GCA_037745415 |
| 900 | SAL-23-VL-SD-MI-0032 | USA, MI | 2023 | Patient, feces | London | 4,976,368 | Contig | 31 | 439,035 | 52.0 | SAMN40725409 | GCA_037930855 |
| 901 | FSIS32411200 | USA, MO | 2024 | Food, pork | London | 4,707,888 | Contig | 138 | 72,101 | 52.5 | SAMN41020278 | GCA_038418545 |
| 902 | FSIS12429103 | USA, NE | 2024 | Food, pork | London | 4,688,179 | Contig | 45 | 200,041 | 52.0 | SAMN41070303 | GCA_038446215 |
| 903 | FSIS22415974 | USA, TN | 2024 | Food, pork | London | 4,712,442 | Contig | 32 | 266,318 | 52.0 | SAMN41105157 | GCA_038626505 |
| 904 | FSIS32411235 | USA, IA | 2024 | Food, pork | London | 4,674,858 | Contig | 109 | 88,248 | 52.5 | SAMN41096380 | GCA_038629325 |
| 905 | FSIS12429203 | USA, TX | 2024 | Food, pork | London | 4,728,438 | Contig | 108 | 81,127 | 52.5 | SAMN41152800 | GCA_039138065 |
| 906 | FSIS12429232 | USA, IA | 2024 | Swine | London | 4,851,689 | Contig | 191 | 54,500 | 52.5 | SAMN41152841 | GCA_039138395 |
| 907 | FSIS12429380 | USA, TN | 2024 | Swine | London | 4,668,429 | Contig | 52 | 187,950 | 52.5 | SAMN41463447 | GCA_039717555 |
| 908 | FSIS12429559 | USA, SD | 2024 | Swine | London | 4,749,935 | Contig | 146 | 56,946 | 52.5 | SAMN41657747 | GCA_040041675 |
| 909 | FSIS12429554 | USA, IL | 2024 | Swine | London | 4,701,969 | Contig | 63 | 116,139 | 52.5 | SAMN41657714 | GCA_040043175 |
| 910 | SE07 | China, Jiangsu, Nanjing | 2021 | Patient, feces | London | 4,656,031 | Scaffold | 48 | 349,149 | 52.0 | SAMN30942144 | GCA_040191735 |
| 911 | SENASICA_Sa_BR87 | Mexico | 2023 | Food, beef | London | 4,933,865 | Contig | 56 | 226,359 | 52.0 | SAMN41896498 | GCA_040251655 |
| 912 | SENASICA_Sa_BR25 | Mexico | 2023 | Food, pork | London | 4,853,904 | Contig | 36 | 289,178 | 52.0 | SAMN41896436 | GCA_040252495 |
| 913 | SENASICA_Sa_BR26 | Mexico | 2023 | Food, pork | London | 4,868,549 | Contig | 38 | 289,176 | 52.0 | SAMN41896437 | GCA_040252535 |
| 914 | SENASICA_Sa_BR27 | Mexico | 2023 | Food, pork | London | 4,900,226 | Contig | 37 | 349,465 | 52.0 | SAMN41896438 | GCA_040252555 |
| 915 | FSIS12429862 | USA, IA | 2024 | Swine | London | 4,653,884 | Contig | 188 | 38,870 | 52.5 | SAMN42206466 | GCA_040442305 |
| 916 | FSIS32411540 | USA, OH | 2024 | Food, beef | London | 4,726,378 | Contig | 54 | 257,101 | 52.0 | SAMN42371560 | GCA_040554665 |
| 917 | FSIS12429951 | USA, NH | 2024 | Swine | London | 4,600,493 | Contig | 184 | 45,013 | 52.5 | SAMN42492942 | GCA_040730365 |
| 918 | FSIS12430092 | USA, TN | 2024 | Swine | London | 4,663,028 | Contig | 147 | 58,452 | 52.5 | SAMN42738484 | GCA_040811155 |
| 919 | FSIS32411732 | USA, WI | 2024 | Food, pork | London | 4,815,342 | Contig | 40 | 245,537 | 52.0 | SAMN43084223 | GCA_041218025 |
| 920 | FSIS12430546 | USA, IL | 2024 | Swine | London | 4,638,160 | Contig | 229 | 39,045 | 52.5 | SAMN43367631 | GCA_041510965 |
| 921 | MPSPGB89_Sa_BM42 | Mexico | 2022 | Food, beef | London | 4,906,117 | Contig | 50 | 238,353 | 52.0 | SAMN37792138 | GCA_041678285 |
| 922 | FSIS12430681 | USA, IA | 2024 | Swine | London | 4,701,274 | Contig | 119 | 77,604 | 52.5 | SAMN43551064 | GCA_041885075 |
| 923 | FSIS22416881 | USA, MI | 2024 | Food, pork | London | 4,771,513 | Contig | 44 | 219,569 | 52.0 | SAMN43733722 | GCA_042218645 |
| 924 | MPSPGP51-2_Sa_BM52 | Mexico | 2022 | Food, pork | London | 4,644,160 | Contig | 44 | 228,696 | 52.0 | SAMN37792148 | GCA_042249845 |
| 925 | MPSPGP22-2_Sa_BL72 | Mexico | 2022 | Food, pork | London | 4,744,551 | Contig | 41 | 228,702 | 52.0 | SAMN37792076 | GCA_042251785 |
| 926 | MPSPGP20-2_Sa_BL63 | Mexico | 2022 | Food, pork | London | 4,728,793 | Contig | 43 | 203,728 | 52.0 | SAMN37792067 | GCA_042251945 |
| 927 | MPSPGP20-1_Sa_BL62 | Mexico | 2022 | Food, pork | London | 4,743,970 | Contig | 49 | 210,857 | 52.0 | SAMN37792066 | GCA_042251955 |
| 928 | MPSPGB64-2_Sa_BL18 | Mexico | 2021 | Food, beef | London | 4,713,548 | Contig | 53 | 189,312 | 52.0 | SAMN37792025 | GCA_042253245 |
| 929 | MPSPGB64-1_Sa_BL17 | Mexico | 2021 | Food, beef | London | 4,716,062 | Contig | 50 | 237,395 | 52.0 | SAMN37792024 | GCA_042253285 |
| 930 | MPSPGB62-2_Sa_BL13 | Mexico | 2021 | Food, beef | London | 4,762,652 | Contig | 51 | 243,490 | 52.0 | SAMN37792020 | GCA_042253345 |
| 931 | FSIS32411954 | USA, TN | 2024 | Food, pork | London | 4,700,636 | Contig | 61 | 177,773 | 52.0 | SAMN44027589 | GCA_042698125 |
| 932 | AUSMDU00085185 | Australia,Victoria | 2023 | patient | London | 5,186,476 | Contig | 114 | 102,997 | 52.0 | SAMN41142749 | GCA_043028645 |
| 933 | AUSMDU00086031 | Australia,Victoria | 2023 | patient | London | 4,747,330 | Contig | 97 | 97,228 | 52.0 | SAMN41142892 | GCA_043031685 |
| 934 | AUSMDU00082883 | Australia,Victoria | 2023 | patient | London | 4,929,154 | Contig | 129 | 80,117 | 52.5 | SAMN41142130 | GCA_043045515 |
| 935 | FSIS22417184 | USA, IL | 2024 | Food, pork | London | 4,831,585 | Contig | 41 | 275,404 | 52.0 | SAMN44420270 | GCA_043882545 |
| 936 | FSIS12432152 | USA, OH | 2024 | Food, beef | London | 4,667,460 | Contig | 40 | 275,836 | 52.0 | SAMN44459253 | GCA_043958795 |
| 937 | FSIS12432621 | USA, TN | 2024 | Swine | London | 4,740,323 | Contig | 46 | 226,121 | 52.0 | SAMN44571747 | GCA_044488245 |
| 938 | SENASICA_Sa_BP31 | Mexico | 2023 | Food, pork | London | 4,852,085 | Contig | 49 | 349,454 | 52.0 | SAMN44675977 | GCA_044981385 |
| 939 | SENASICA_Sa_BQ16 | Mexico | 2023 | Food, pork | London | 4,841,869 | Contig | 37 | 294,972 | 52.0 | SAMN44676048 | GCA_044981605 |
| 940 | SENASICA_Sa_BP10 | Mexico | 2023 | Food, pork | London | 4,963,054 | Contig | 62 | 245,572 | 52.0 | SAMN44675957 | GCA_044983025 |
| 941 | AUSMDU00032306 | Australia,Victoria | 2019 | patient | London | 4,944,525 | Contig | 60 | 162,103 | 52.0 | SAMN41409664 | GCA_045099455 |
| 942 | AUSMDU00051182 | Australia,Victoria | 2020 | patient | London | 4,861,833 | Contig | 61 | 155,136 | 52.0 | SAMN41409795 | GCA_045099795 |
| 943 | SENASICA_Sa_BW32 | Mexico | 2024 | Food, beef | London | 4,825,764 | Contig | 56 | 340,231 | 52.0 | SAMN44825990 | GCA_045187165 |
| 944 | SENASICA_Sa_BW30 | Mexico | 2024 | Food, beef | London | 4,844,355 | Contig | 55 | 246,503 | 52.0 | SAMN44825988 | GCA_045187225 |
| 945 | FSIS32412261 | USA, IA | 2024 | Food, pork | London | 4,712,614 | Contig | 37 | 405,298 | 52.0 | SAMN45043610 | GCA_045341015 |
| 946 | FSIS12433492 | USA, NC | 2024 | Swine | London | 4,750,653 | Contig | 35 | 245,533 | 52.0 | SAMN45172324 | GCA_045698915 |

| **Extended Data Table 2 |** **Multilocus sequence typing of 946 Salmonella London isolates analyzed in this study.** | | | | | | | | | |
| --- | --- | --- | --- | --- | --- | --- | --- | --- | --- |
| **Isolate** | **aroC** | **dnaN** | **hemD** | **hisD** | **purE** | **sucA** | **thrA** | **ST** | **clonal complex** |
| 01_SAL17_033 | 10 | 60 | 58 | 66 | 6 | 65 | 16 | 155 | 237 |
| 02_SAL17_042 | 10 | 60 | 58 | 66 | 6 | 65 | 16 | 155 | 237 |
| 03_SAL17_048 | 10 | 60 | 58 | 66 | 6 | 65 | 16 | 155 | 237 |
| 04_SAL17_069 | 10 | 60 | 58 | 66 | 6 | 65 | 16 | 155 | 237 |
| 05_SAL17_073 | 10 | 60 | 58 | 66 | 6 | 65 | 16 | 155 | 237 |
| 06_SAL17_091 | 10 | 60 | 58 | 66 | 6 | 65 | 16 | 155 | 237 |
| 07_SAL17_092 | 10 | 60 | 58 | 66 | 6 | 65 | 16 | 155 | 237 |
| 08_SAL17_094 | 10 | 60 | 58 | 66 | 6 | 65 | 16 | 155 | 237 |
| 09_SAL17_098 | 10 | 60 | 58 | 66 | 6 | 65 | 16 | 155 | 237 |
| 10_SAL17_109 | 10 | 60 | 58 | 66 | 6 | 65 | 16 | 155 | 237 |
| 11_SAL17_121 | 10 | 60 | 58 | 66 | 6 | 65 | 16 | 155 | 237 |
| 12_SAL17_158 | 10 | 60 | 58 | 66 | 6 | 65 | 16 | 155 | 237 |
| 13_SAL17_185 | 10 | 60 | 58 | 66 | 6 | 65 | 16 | 155 | 237 |
| 14_SAL17_187 | 10 | 60 | 58 | 66 | 6 | 65 | 16 | 155 | 237 |
| 15_SAL17_193 | 10 | 60 | 58 | 66 | 6 | 65 | 16 | 155 | 237 |
| 16_SAL18_034 | 10 | 60 | 58 | 66 | 6 | 65 | 16 | 155 | 237 |
| 17_SAL18_072 | 10 | 60 | 58 | 66 | 6 | 65 | 16 | 155 | 237 |
| 18_SAL18_088 | 10 | 60 | 58 | 66 | 6 | 65 | 16 | 155 | 237 |
| 19_SAL18_091 | 10 | 60 | 58 | 66 | 6 | 65 | 16 | 155 | 237 |
| 20_SAL18_115 | 10 | 60 | 58 | 66 | 6 | 65 | 16 | 155 | 237 |
| 21_SAL18_125 | 10 | 60 | 58 | 66 | 6 | 65 | 16 | 155 | 237 |
| 22_SAL18_137 | 10 | 60 | 58 | 66 | 6 | 65 | 16 | 155 | 237 |
| 23SAL064 | 10 | 60 | 58 | 66 | 6 | 65 | 16 | 155 | 237 |
| 23SAL065 | 10 | 60 | 58 | 66 | 6 | 65 | 16 | 155 | 237 |
| 23SAL075 | 10 | 60 | 58 | 66 | 6 | 65 | 16 | 155 | 237 |
| 23SAL104 | 10 | 60 | 58 | 66 | 6 | 65 | 16 | 155 | 237 |
| 23_SAL18_138 | 10 | 60 | 58 | 66 | 6 | 65 | 16 | 155 | 237 |
| 23SAL187 | 10 | 60 | 58 | 66 | 6 | 65 | 16 | 155 | 237 |
| 23SAL188 | 10 | 60 | 58 | 66 | 6 | 65 | 16 | 155 | 237 |
| 23SAL287 | 10 | 60 | 58 | 66 | 6 | 65 | 16 | 155 | 237 |
| 24_SAL18_145 | 10 | 60 | 58 | 66 | 6 | 65 | 16 | 155 | 237 |
| 25_SAL18_155 | 10 | 60 | 58 | 66 | 6 | 65 | 16 | 155 | 237 |
| 26_SAL18_163 | 10 | 60 | 58 | 66 | 6 | 65 | 16 | 155 | 237 |
| 27_SAL18_180 | 10 | 60 | 58 | 66 | 6 | 65 | 16 | 155 | 237 |
| 28_SAL18_181 | 10 | 60 | 58 | 66 | 6 | 65 | 16 | 155 | 237 |
| 29_SAL18_236 | 10 | 60 | 58 | 66 | 6 | 65 | 16 | 155 | 237 |
| 30_SAL18_268 | 10 | 60 | 58 | 66 | 6 | 65 | 16 | 155 | 237 |
| 31_SAL18_269 | 10 | 60 | 58 | 66 | 6 | 65 | 16 | 155 | 237 |
| 32_SAL19_041 | 10 | 60 | 58 | 66 | 6 | 65 | 16 | 155 | 237 |
| 33_SAL19_055 | 10 | 60 | 58 | 66 | 6 | 65 | 16 | 155 | 237 |
| 34_SAL19_056 | 10 | 60 | 58 | 66 | 6 | 65 | 16 | 155 | 237 |
| 35_SAL19_059 | 10 | 60 | 58 | 66 | 6 | 65 | 16 | 155 | 237 |
| 36_SAL19_062 | 10 | 60 | 58 | 66 | 6 | 65 | 16 | 155 | 237 |
| 37_SAL19_063 | 10 | 60 | 58 | 66 | 6 | 65 | 16 | 155 | 237 |
| 38_SAL19_137 | 10 | 60 | 58 | 66 | 6 | 65 | 16 | 155 | 237 |
| 39_SAL19_140 | 10 | 60 | 58 | 66 | 6 | 65 | 16 | 155 | 237 |
| 40_SAL19_147 | 10 | 60 | 58 | 66 | 6 | 65 | 16 | 155 | 237 |
| 41_SAL19_150 | 10 | 60 | 58 | 66 | 6 | 65 | 16 | 155 | 237 |
| 42_SAL19_253 | 10 | 60 | 58 | 66 | 6 | 65 | 16 | 155 | 237 |
| 44_SAL19_265 | 10 | 60 | 58 | 66 | 6 | 65 | 16 | 155 | 237 |
| 45_SAL19_266 | 10 | 60 | 58 | 66 | 6 | 65 | 16 | 155 | 237 |
| 46_SAL19_267 | 10 | 60 | 58 | 66 | 6 | 65 | 16 | 155 | 237 |
| 47_SAL19_269 | 10 | 60 | 58 | 66 | 6 | 65 | 16 | 155 | 237 |
| 48_SAL19_280 | 10 | 60 | 58 | 66 | 6 | 65 | 16 | 155 | 237 |
| 49_SAL19_293 | 10 | 60 | 58 | 66 | 6 | 65 | 16 | 155 | 237 |
| 50_SAL19_299 | 10 | 60 | 58 | 66 | 6 | 65 | 16 | 155 | 237 |
| 51_SAL19_301 | 10 | 60 | 58 | 66 | 6 | 65 | 16 | 155 | 237 |
| 52_SAL20_202 | 10 | 60 | 58 | 66 | 6 | 65 | 16 | 155 | 237 |
| 53_SAL20_266 | 10 | 60 | 58 | 66 | 6 | 65 | 16 | 155 | 237 |
| 54_SAL20_285 | 10 | 60 | 58 | 66 | 6 | 65 | 16 | 155 | 237 |
| 55_SAL20_296 | 10 | 60 | 58 | 66 | 6 | 65 | 16 | 155 | 237 |
| 56_SAL20_300 | 10 | 60 | 58 | 66 | 6 | 65 | 16 | 155 | 237 |
| 57_SAL21_232 | 10 | 60 | 58 | 66 | 6 | 65 | 16 | 155 | 237 |
| 58_SAL21_280 | 10 | 60 | 58 | 66 | 6 | 65 | 16 | 155 | 237 |
| 59_SAL21_283 | 10 | 60 | 58 | 66 | 6 | 65 | 16 | 155 | 237 |
| 60_SAL21_287 | 10 | 60 | 58 | 66 | 6 | 65 | 16 | 155 | 237 |
| 61_SAL21_494 | 10 | 60 | 58 | 66 | 6 | 65 | 16 | 155 | 237 |
| 62_SAL21_522 | 10 | 60 | 58 | 66 | 6 | 65 | 16 | 155 | 237 |
| 63_SAL21_523 | 10 | 60 | 58 | 66 | 6 | 65 | 16 | 155 | 237 |
| 65_SAL21_530 | 10 | 60 | 58 | 66 | 6 | 65 | 16 | 155 | 237 |
| 67_SAL21_533 | 10 | 60 | 58 | 66 | 6 | 65 | 16 | 155 | 237 |
| 68_SAL21_534 | 10 | 60 | 58 | 66 | 6 | 65 | 16 | 155 | 237 |
| 69_SAL21_535 | 10 | 60 | 58 | 66 | 6 | 65 | 16 | 155 | 237 |
| 70_SAL21_536 | 10 | 60 | 58 | 66 | 6 | 65 | 16 | 155 | 237 |
| GCA_000487755 | 10 | 60 | 58 | 66 | 6 | 65 | 16 | 155 | 237 |
| GCA_001479935 | 10 | 60 | 58 | 66 | 6 | 65 | 16 | 155 | 237 |
| GCA_002047085 | 10 | 60 | 270 | 66 | 6 | 65 | 16 | - | 237 |
| GCA_002047355 | 10 | 60 | 58 | 66 | 6 | 65 | 16 | 155 | 237 |
| GCA_002048305 | 10 | 60 | 58 | 66 | 6 | 65 | 16 | 155 | 237 |
| GCA_002063165 | 10 | 60 | 58 | 66 | 6 | 65 | 16 | 155 | 237 |
| GCA_002064515 | 10 | 60 | 58 | 66 | 6 | 65 | 16 | 155 | 237 |
| GCA_003875195 | 10 | 60 | 58 | 66 | 6 | 65 | 16 | 155 | 237 |
| GCA_003881515 | 10 | 60 | 58 | 66 | 6 | 65 | 39 | 2124 | 237 |
| GCA_003886945 | 10 | 60 | 58 | 66 | 6 | 65 | 16 | 155 | 237 |
| GCA_003904115 | 10 | 60 | 58 | 66 | 6 | 65 | 16 | 155 | 237 |
| GCA_003910765 | 10 | 60 | 58 | 66 | 6 | 65 | 16 | 155 | 237 |
| GCA_003917235 | 10 | 60 | 58 | 66 | 6 | 65 | 16 | 155 | 237 |
| GCA_004160915 | 10 | 60 | 58 | 66 | 6 | 65 | 16 | 155 | 237 |
| GCA_004179805 | 10 | 60 | 58 | 66 | 6 | 65 | 16 | 155 | 237 |
| GCA_004181195 | 10 | 60 | 58 | 66 | 6 | 65 | 16 | 155 | 237 |
| GCA_004183765 | 10 | 60 | 58 | 66 | 6 | 65 | 39 | 2124 | 237 |
| GCA_004185305 | 10 | 60 | 58 | 66 | 6 | 65 | 16 | 155 | 237 |
| GCA_004256175 | 10 | 60 | 58 | 66 | 6 | 65 | 39 | 2124 | 237 |
| GCA_004256925 | 10 | 60 | 58 | 66 | 6 | 65 | 16 | 155 | 237 |
| GCA_004258625 | 10 | 60 | 58 | 66 | 6 | 65 | 16 | 155 | 237 |
| GCA_004268465 | 10 | 60 | 58 | 66 | 6 | 65 | 16 | 155 | 237 |
| GCA_005549255 | 10 | 60 | 58 | 66 | 6 | 65 | 16 | 155 | 237 |
| GCA_006227535 | 10 | 60 | 58 | 66 | 6 | 65 | 16 | 155 | 237 |
| GCA_006227585 | 10 | 60 | 58 | 66 | 6 | 65 | 16 | 155 | 237 |
| GCA_006341485 | 10 | 60 | 58 | 66 | 6 | 65 | 16 | 155 | 237 |
| GCA_006341775 | 10 | 60 | 58 | 66 | 6 | 65 | 16 | 155 | 237 |
| GCA_006378375 | 10 | 60 | 58 | 66 | 6 | 65 | 16 | 155 | 237 |
| GCA_006378435 | 10 | 60 | 58 | 66 | 6 | 65 | 16 | 155 | 237 |
| GCA_006429695 | 10 | 60 | 58 | 66 | 6 | 65 | 16 | 155 | 237 |
| GCA_006752845 | 10 | 60 | 58 | 66 | 6 | 65 | 16 | 155 | 237 |
| GCA_006976285 | 10 | 60 | 58 | 66 | 6 | 65 | 16 | 155 | 237 |
| GCA_006977405 | 10 | 60 | 58 | 66 | 6 | 65 | 16 | 155 | 237 |
| GCA_006978565 | 10 | 60 | 58 | 66 | 6 | 65 | 39 | 2124 | 237 |
| GCA_006984205 | 10 | 60 | 58 | 66 | 6 | 65 | 16 | 155 | 237 |
| GCA_006987265 | 10 | 60 | 58 | 66 | 6 | 65 | 16 | 155 | 237 |
| GCA_007115835 | 10 | 60 | 58 | 66 | 6 | 65 | 16 | 155 | 237 |
| GCA_007150225 | 157 | 141 | 17 | 16 | 33 | 13 | 4 | 504 | 380 |
| GCA_007151625 | 10 | 60 | 58 | 66 | 6 | 65 | 16 | 155 | 237 |
| GCA_007217075 | 10 | 60 | 58 | 66 | 6 | 65 | 16 | 155 | 237 |
| GCA_007221795 | 10 | 60 | 58 | 66 | 6 | 65 | 16 | 155 | 237 |
| GCA_007231895 | 10 | 60 | 58 | 66 | 6 | 65 | 16 | 155 | 237 |
| GCA_007240875 | 10 | 60 | 58 | 66 | 6 | 65 | 16 | 155 | 237 |
| GCA_007247175 | 10 | 60 | 58 | 66 | 6 | 65 | 39 | 2124 | 237 |
| GCA_007267305 | 10 | 60 | 58 | 66 | 6 | 65 | 39 | 2124 | 237 |
| GCA_007272875 | 157 | 141 | 17 | 16 | 33 | 13 | 4 | 504 | 380 |
| GCA_007275415 | 10 | 60 | 58 | 66 | 6 | 65 | 39 | 2124 | 237 |
| GCA_007292985 | 10 | 60 | 58 | 66 | 6 | 65 | 16 | 155 | 237 |
| GCA_007293855 | 10 | 60 | 58 | 66 | 6 | 65 | 774 | 4073 | 237 |
| GCA_007296435 | 10 | 60 | 58 | 66 | 6 | 65 | 16 | 155 | 237 |
| GCA_007300295 | 10 | 60 | 58 | 66 | 6 | 65 | 16 | 155 | 237 |
| GCA_007327875 | 10 | 60 | 58 | 66 | 6 | 65 | 16 | 155 | 237 |
| GCA_007333455 | 10 | 60 | 58 | 66 | 6 | 65 | 16 | 155 | 237 |
| GCA_007334845 | 10 | 60 | 58 | 66 | 6 | 65 | 16 | 155 | 237 |
| GCA_007355355 | 10 | 60 | 58 | 66 | 6 | 65 | 16 | 155 | 237 |
| GCA_007355695 | 10 | 60 | 58 | 66 | 6 | 65 | 16 | 155 | 237 |
| GCA_007356575 | 157 | 141 | 17 | 16 | 33 | 13 | 4 | 504 | 380 |
| GCA_007357715 | 10 | 60 | 58 | 66 | 6 | 65 | 16 | 155 | 237 |
| GCA_007359855 | 10 | 60 | 58 | 66 | 6 | 65 | 16 | 155 | 237 |
| GCA_007363895 | 10 | 60 | 58 | 66 | 6 | 65 | 16 | 155 | 237 |
| GCA_007368365 | 10 | 60 | 58 | 66 | 6 | 65 | 16 | 155 | 237 |
| GCA_007368745 | 10 | 60 | 58 | 66 | 6 | 65 | 16 | 155 | 237 |
| GCA_007370525 | 10 | 60 | 58 | 66 | 6 | 65 | 774 | 4073 | 237 |
| GCA_007374685 | 10 | 60 | 58 | 66 | 6 | 65 | 16 | 155 | 237 |
| GCA_007382325 | 10 | 60 | 58 | 66 | 6 | 65 | 16 | 155 | 237 |
| GCA_007384265 | 10 | 60 | 58 | 66 | 6 | 65 | 16 | 155 | 237 |
| GCA_007385505 | 10 | 60 | 58 | 66 | 6 | 65 | 16 | 155 | 237 |
| GCA_007388665 | 10 | 60 | 58 | 66 | 6 | 65 | 16 | 155 | 237 |
| GCA_007389925 | 10 | 60 | 58 | 66 | 6 | 65 | 16 | 155 | 237 |
| GCA_007391625 | 10 | 60 | 58 | 66 | 6 | 65 | 16 | 155 | 237 |
| GCA_007403865 | 10 | 60 | 58 | 66 | 6 | 65 | 16 | 155 | 237 |
| GCA_007409685 | 10 | 60 | 58 | 66 | 6 | 65 | 16 | 155 | 237 |
| GCA_007412505 | 10 | 60 | 58 | 66 | 6 | 65 | 39 | 2124 | 237 |
| GCA_007419405 | 10 | 60 | 58 | 66 | 6 | 65 | 16 | 155 | 237 |
| GCA_007421365 | 10 | 60 | 58 | 66 | 6 | 65 | 16 | 155 | 237 |
| GCA_007426445 | 157 | 141 | 17 | 16 | 33 | 13 | 4 | 504 | 380 |
| GCA_007428265 | 10 | 60 | 58 | 66 | 6 | 65 | 16 | 155 | 237 |
| GCA_007429265 | 10 | 60 | 58 | 66 | 6 | 65 | 16 | 155 | 237 |
| GCA_007429565 | 10 | 60 | 58 | 66 | 6 | 65 | 16 | 155 | 237 |
| GCA_007433165 | 157 | 141 | 17 | 16 | 33 | 13 | 4 | 504 | 380 |
| GCA_007433765 | 10 | 60 | 58 | 66 | 6 | 65 | 16 | 155 | 237 |
| GCA_007439165 | 10 | 60 | 58 | 66 | 6 | 65 | 16 | 155 | 237 |
| GCA_007442025 | 10 | 60 | 58 | 66 | 6 | 65 | 16 | 155 | 237 |
| GCA_007443005 | 10 | 60 | 58 | 66 | 6 | 65 | 16 | 155 | 237 |
| GCA_007443205 | 10 | 60 | 58 | 66 | 6 | 65 | 16 | 155 | 237 |
| GCA_007443845 | 10 | 60 | 58 | 66 | 6 | 65 | 16 | 155 | 237 |
| GCA_007443885 | 10 | 60 | 58 | 66 | 6 | 65 | 16 | 155 | 237 |
| GCA_007444025 | 10 | 60 | 58 | 66 | 6 | 65 | 16 | 155 | 237 |
| GCA_007444265 | 10 | 60 | 58 | 66 | 6 | 65 | 16 | 155 | 237 |
| GCA_007444565 | 10 | 60 | 58 | 66 | 6 | 65 | 16 | 155 | 237 |
| GCA_007444625 | 10 | 60 | 58 | 66 | 6 | 65 | 16 | 155 | 237 |
| GCA_007445185 | 10 | 60 | 58 | 66 | 6 | 65 | 16 | 155 | 237 |
| GCA_007445425 | 10 | 60 | 58 | 66 | 6 | 65 | 16 | 155 | 237 |
| GCA_007445585 | 10 | 60 | 58 | 66 | 6 | 65 | 16 | 155 | 237 |
| GCA_007445975 | 10 | 60 | 58 | 66 | 6 | 65 | 16 | 155 | 237 |
| GCA_007446205 | 10 | 60 | 58 | 66 | 6 | 65 | 16 | 155 | 237 |
| GCA_007446225 | 10 | 60 | 58 | 66 | 6 | 65 | 16 | 155 | 237 |
| GCA_007446765 | 10 | 60 | 58 | 66 | 6 | 65 | 16 | 155 | 237 |
| GCA_007524705 | 10 | 60 | 58 | 66 | 6 | 65 | 16 | 155 | 237 |
| GCA_007527545 | 10 | 60 | 58 | 66 | 6 | 65 | 39 | 2124 | 237 |
| GCA_007531265 | 10 | 60 | 58 | 66 | 6 | 65 | 16 | 155 | 237 |
| GCA_007532905 | 10 | 60 | 58 | 66 | 6 | 65 | 16 | 155 | 237 |
| GCA_007556875 | 10 | 60 | 58 | 66 | 6 | 65 | 16 | 155 | 237 |
| GCA_007556965 | 10 | 60 | 58 | 66 | 6 | 65 | 16 | 155 | 237 |
| GCA_007557295 | 10 | 60 | 58 | 66 | 6 | 65 | 16 | 155 | 237 |
| GCA_007557455 | 10 | 60 | 58 | 66 | 6 | 65 | 16 | 155 | 237 |
| GCA_007557475 | 10 | 60 | 58 | 66 | 6 | 65 | 16 | 155 | 237 |
| GCA_007586935 | 157 | 141 | 17 | 16 | 33 | 13 | 4 | 504 | 380 |
| GCA_007596275 | 10 | 60 | 58 | 66 | 6 | 65 | 16 | 155 | 237 |
| GCA_007601575 | 10 | 60 | 58 | 66 | 6 | 65 | 774 | 4073 | 237 |
| GCA_007607255 | 10 | 60 | 58 | 66 | 6 | 65 | 39 | 2124 | 237 |
| GCA_007608615 | 10 | 60 | 58 | 66 | 6 | 65 | 16 | 155 | 237 |
| GCA_007614015 | 10 | 60 | 58 | 66 | 6 | 65 | 16 | 155 | 237 |
| GCA_007614415 | 10 | 60 | 58 | 66 | 6 | 65 | 16 | 155 | 237 |
| GCA_007653535 | 10 | 60 | 58 | 66 | 6 | 65 | 39 | 2124 | 237 |
| GCA_007656215 | 10 | 60 | 58 | 66 | 6 | 65 | 16 | 155 | 237 |
| GCA_007668235 | 10 | 60 | 58 | 66 | 6 | 65 | 16 | 155 | 237 |
| GCA_007668525 | 10 | 60 | 58 | 66 | 6 | 65 | 16 | 155 | 237 |
| GCA_007668945 | 157 | 141 | 17 | 16 | 33 | 13 | 4 | 504 | 380 |
| GCA_007738755 | 10 | 60 | 58 | 66 | 6 | 65 | 16 | 155 | 237 |
| GCA_007793135 | 10 | 60 | 58 | 66 | 6 | 65 | 16 | 155 | 237 |
| GCA_007793995 | 10 | 60 | 58 | 66 | 6 | 65 | 16 | 155 | 237 |
| GCA_008396495 | 10 | 60 | 58 | 66 | 6 | 65 | 16 | 155 | 237 |
| GCA_008396555 | 10 | 60 | 58 | 66 | 6 | 65 | 16 | 155 | 237 |
| GCA_008396655 | 10 | 60 | 58 | 66 | 6 | 65 | 16 | 155 | 237 |
| GCA_008403865 | 10 | 60 | 58 | 66 | 6 | 65 | 16 | 155 | 237 |
| GCA_008403885 | 10 | 60 | 58 | 66 | 6 | 65 | 16 | 155 | 237 |
| GCA_008406745 | 10 | 60 | 58 | 66 | 6 | 65 | 16 | 155 | 237 |
| GCA_008413345 | 10 | 60 | 58 | 66 | 6 | 65 | 16 | 155 | 237 |
| GCA_008426865 | 10 | 60 | 58 | 66 | 6 | 65 | 16 | 155 | 237 |
| GCA_008428445 | 10 | 60 | 58 | 66 | 6 | 65 | 16 | 155 | 237 |
| GCA_008432065 | 10 | 60 | 58 | 66 | 6 | 65 | 16 | 155 | 237 |
| GCA_008434725 | 10 | 60 | 58 | 66 | 6 | 65 | 16 | 155 | 237 |
| GCA_008436085 | 10 | 60 | 58 | 66 | 6 | 65 | 16 | 155 | 237 |
| GCA_008437665 | 10 | 60 | 58 | 66 | 6 | 65 | 16 | 155 | 237 |
| GCA_008440345 | 10 | 60 | 58 | 66 | 6 | 65 | 16 | 155 | 237 |
| GCA_008443305 | 10 | 60 | 58 | 66 | 6 | 65 | 16 | 155 | 237 |
| GCA_008446865 | 10 | 60 | 58 | 66 | 6 | 65 | 16 | 155 | 237 |
| GCA_008450125 | 10 | 60 | 58 | 66 | 6 | 65 | 16 | 155 | 237 |
| GCA_008450745 | 10 | 60 | 58 | 66 | 6 | 65 | 16 | 155 | 237 |
| GCA_008451945 | 10 | 60 | 58 | 66 | 6 | 65 | 16 | 155 | 237 |
| GCA_008453455 | 10 | 60 | 58 | 66 | 6 | 65 | 16 | 155 | 237 |
| GCA_008454175 | 10 | 60 | 58 | 66 | 6 | 65 | 16 | 155 | 237 |
| GCA_008457445 | 10 | 60 | 58 | 66 | 6 | 65 | 16 | 155 | 237 |
| GCA_008457525 | 10 | 60 | 58 | 66 | 6 | 65 | 16 | 155 | 237 |
| GCA_008471165 | 10 | 60 | 58 | 66 | 6 | 65 | 16 | 155 | 237 |
| GCA_008475405 | 10 | 60 | 58 | 66 | 6 | 65 | 16 | 155 | 237 |
| GCA_008476205 | 10 | 60 | 58 | 66 | 6 | 65 | 16 | 155 | 237 |
| GCA_008480485 | 10 | 60 | 58 | 66 | 6 | 65 | 16 | 155 | 237 |
| GCA_008487265 | 10 | 60 | 58 | 66 | 6 | 65 | 16 | 155 | 237 |
| GCA_008487445 | 10 | 60 | 58 | 66 | 6 | 65 | 16 | 155 | 237 |
| GCA_008491745 | 10 | 60 | 58 | 66 | 6 | 65 | 16 | 155 | 237 |
| GCA_008496845 | 10 | 60 | 58 | 66 | 6 | 65 | 16 | 155 | 237 |
| GCA_008500255 | 10 | 60 | 58 | 66 | 6 | 65 | 16 | 155 | 237 |
| GCA_008503165 | 10 | 60 | 58 | 66 | 6 | 65 | 16 | 155 | 237 |
| GCA_008504045 | 10 | 60 | 58 | 66 | 6 | 65 | 16 | 155 | 237 |
| GCA_008506385 | 10 | 60 | 58 | 66 | 6 | 65 | 16 | 155 | 237 |
| GCA_008513415 | 10 | 60 | 58 | 66 | 6 | 65 | 16 | 155 | 237 |
| GCA_008515015 | 10 | 60 | 58 | 66 | 6 | 65 | 16 | 155 | 237 |
| GCA_008515075 | 10 | 60 | 58 | 66 | 6 | 65 | 16 | 155 | 237 |
| GCA_008515765 | 10 | 60 | 58 | 66 | 6 | 65 | 16 | 155 | 237 |
| GCA_008519985 | 10 | 60 | 58 | 66 | 6 | 65 | 16 | 155 | 237 |
| GCA_008519995 | 10 | 60 | 58 | 66 | 6 | 65 | 16 | 155 | 237 |
| GCA_008520575 | 10 | 60 | 58 | 66 | 6 | 65 | 16 | 155 | 237 |
| GCA_008521665 | 10 | 60 | 58 | 66 | 6 | 65 | 16 | 155 | 237 |
| GCA_008523825 | 10 | 60 | 58 | 66 | 6 | 65 | 16 | 155 | 237 |
| GCA_008524515 | 10 | 60 | 58 | 66 | 6 | 65 | 16 | 155 | 237 |
| GCA_008524885 | 10 | 60 | 58 | 66 | 6 | 65 | 16 | 155 | 237 |
| GCA_008525085 | 10 | 60 | 58 | 66 | 6 | 65 | 16 | 155 | 237 |
| GCA_008526895 | 10 | 60 | 58 | 902 | 6 | 65 | 16 | 3838 | 237 |
| GCA_008527865 | 10 | 60 | 58 | 66 | 6 | 65 | 16 | 155 | 237 |
| GCA_008529975 | 10 | 60 | 58 | 66 | 6 | 65 | 16 | 155 | 237 |
| GCA_008531255 | 10 | 60 | 58 | 66 | 6 | 65 | 16 | 155 | 237 |
| GCA_008532895 | 10 | 60 | 58 | 66 | 6 | 65 | 16 | 155 | 237 |
| GCA_008532915 | 10 | 60 | 58 | 66 | 6 | 65 | 16 | 155 | 237 |
| GCA_008537595 | 10 | 60 | 58 | 66 | 6 | 65 | 16 | 155 | 237 |
| GCA_008540175 | 10 | 60 | 58 | 66 | 6 | 65 | 16 | 155 | 237 |
| GCA_008549935 | 10 | 60 | 58 | 66 | 6 | 65 | 16 | 155 | 237 |
| GCA_008550765 | 10 | 60 | 58 | 66 | 6 | 65 | 16 | 155 | 237 |
| GCA_008555235 | 10 | 60 | 58 | 66 | 6 | 65 | 16 | 155 | 237 |
| GCA_008555275 | 10 | 60 | 58 | 66 | 6 | 65 | 16 | 155 | 237 |
| GCA_008557215 | 10 | 60 | 58 | 66 | 6 | 65 | 39 | 2124 | 237 |
| GCA_008745135 | 10 | 60 | 58 | 66 | 6 | 65 | 16 | 155 | 237 |
| GCA_008759895 | 10 | 60 | 58 | 66 | 6 | 65 | 16 | 155 | 237 |
| GCA_008760375 | 10 | 60 | 58 | 66 | 6 | 65 | 16 | 155 | 237 |
| GCA_008766435 | 10 | 60 | 58 | 66 | 6 | 65 | 16 | 155 | 237 |
| GCA_008779515 | 10 | 60 | 58 | 66 | 6 | 65 | 16 | 155 | 237 |
| GCA_008785005 | 10 | 60 | 58 | 66 | 6 | 65 | 16 | 155 | 237 |
| GCA_008786215 | 10 | 60 | 58 | 66 | 6 | 65 | 16 | 155 | 237 |
| GCA_008875925 | 10 | 60 | 58 | 66 | 6 | 65 | 16 | 155 | 237 |
| GCA_008876485 | 10 | 60 | 58 | 66 | 6 | 65 | 16 | 155 | 237 |
| GCA_008877825 | 10 | 60 | 58 | 66 | 6 | 65 | 39 | 2124 | 237 |
| GCA_008878665 | 10 | 60 | 58 | 66 | 6 | 65 | 16 | 155 | 237 |
| GCA_008901805 | 10 | 60 | 58 | 66 | 6 | 65 | 16 | 155 | 237 |
| GCA_008917785 | 10 | 60 | 58 | 66 | 6 | 65 | 16 | 155 | 237 |
| GCA_009002675 | 10 | 60 | 58 | 66 | 6 | 65 | 16 | 155 | 237 |
| GCA_009002795 | 10 | 60 | 58 | 66 | 6 | 65 | 16 | 155 | 237 |
| GCA_009090225 | 10 | 60 | 58 | 66 | 6 | 65 | 16 | 155 | 237 |
| GCA_009233805 | 10 | 60 | 58 | 66 | 6 | 65 | 16 | 155 | 237 |
| GCA_009291425 | 10 | 60 | 58 | 66 | 6 | 65 | 16 | 155 | 237 |
| GCA_009884595 | 10 | 60 | 58 | 66 | 6 | 65 | 16 | 155 | 237 |
| GCA_009884605 | 10 | 60 | 58 | 66 | 6 | 65 | 16 | 155 | 237 |
| GCA_009884635 | 10 | 60 | 58 | 66 | 6 | 65 | 16 | 155 | 237 |
| GCA_009884655 | 10 | 60 | 58 | 66 | 6 | 65 | 16 | 155 | 237 |
| GCA_009884695 | 10 | 60 | 58 | 66 | 6 | 65 | 16 | 155 | 237 |
| GCA_009884855 | 10 | 60 | 58 | 66 | 6 | 65 | 16 | 155 | 237 |
| GCA_009999145 | 10 | 60 | 58 | 66 | 6 | 65 | 16 | 155 | 237 |
| GCA_010000645 | 10 | 60 | 58 | 66 | 6 | 65 | 16 | 155 | 237 |
| GCA_010371665 | 10 | 60 | 58 | 66 | 6 | 65 | 16 | 155 | 237 |
| GCA_010371845 | 10 | 60 | 58 | 66 | 6 | 65 | 16 | 155 | 237 |
| GCA_010374065 | 10 | 60 | 58 | 66 | 6 | 65 | 16 | 155 | 237 |
| GCA_010379285 | 10 | 60 | 58 | 66 | 6 | 65 | 16 | 155 | 237 |
| GCA_010380545 | 10 | 60 | 58 | 66 | 6 | 65 | 16 | 155 | 237 |
| GCA_010380945 | 10 | 60 | 58 | 66 | 6 | 65 | 16 | 155 | 237 |
| GCA_010414485 | 10 | 60 | 58 | 66 | 6 | 65 | 16 | 155 | 237 |
| GCA_010427945 | 10 | 60 | 58 | 66 | 6 | 65 | 16 | 155 | 237 |
| GCA_010429005 | 10 | 60 | 58 | 66 | 6 | 65 | 16 | 155 | 237 |
| GCA_010429865 | 10 | 60 | 58 | 66 | 6 | 65 | 16 | 155 | 237 |
| GCA_010433115 | 10 | 60 | 58 | 66 | 6 | 65 | 16 | 155 | 237 |
| GCA_010434145 | 10 | 60 | 58 | 66 | 6 | 65 | 16 | 155 | 237 |
| GCA_010434695 | 10 | 60 | 58 | 66 | 6 | 65 | 16 | 155 | 237 |
| GCA_010442035 | 10 | 60 | 58 | 66 | 6 | 65 | 16 | 155 | 237 |
| GCA_010442415 | 10 | 60 | 58 | 66 | 6 | 65 | 16 | 155 | 237 |
| GCA_010442765 | 10 | 60 | 58 | 66 | 6 | 65 | 16 | 155 | 237 |
| GCA_010442855 | 10 | 60 | 58 | 66 | 6 | 65 | 16 | 155 | 237 |
| GCA_010442975 | 10 | 60 | 58 | 66 | 6 | 65 | 16 | 155 | 237 |
| GCA_010449275 | 10 | 60 | 58 | 66 | 6 | 65 | 16 | 155 | 237 |
| GCA_010452315 | 10 | 60 | 58 | 66 | 6 | 65 | 16 | 155 | 237 |
| GCA_010454975 | 10 | 60 | 58 | 66 | 6 | 65 | 16 | 155 | 237 |
| GCA_010458235 | 10 | 60 | 58 | 66 | 6 | 65 | 16 | 155 | 237 |
| GCA_010472225 | 10 | 60 | 58 | 66 | 6 | 65 | 16 | 155 | 237 |
| GCA_010481355 | 10 | 60 | 58 | 66 | 6 | 65 | 16 | 155 | 237 |
| GCA_010485455 | 10 | 60 | 58 | 66 | 6 | 65 | 16 | 155 | 237 |
| GCA_010499175 | 10 | 60 | 58 | 66 | 6 | 65 | 16 | 155 | 237 |
| GCA_010502095 | 10 | 60 | 58 | 66 | 6 | 65 | 16 | 155 | 237 |
| GCA_010506395 | 10 | 60 | 58 | 66 | 6 | 65 | 16 | 155 | 237 |
| GCA_010508375 | 10 | 60 | 58 | 66 | 6 | 65 | 16 | 155 | 237 |
| GCA_010510375 | 10 | 60 | 58 | 66 | 6 | 65 | 16 | 155 | 237 |
| GCA_010511935 | 10 | 60 | 58 | 66 | 6 | 65 | 16 | 155 | 237 |
| GCA_010513695 | 10 | 60 | 58 | 66 | 6 | 65 | 16 | 155 | 237 |
| GCA_010520685 | 10 | 60 | 58 | 66 | 6 | 65 | 16 | 155 | 237 |
| GCA_010526615 | 10 | 60 | 58 | 66 | 6 | 65 | 16 | 155 | 237 |
| GCA_010526755 | 10 | 60 | 58 | 66 | 6 | 65 | 16 | 155 | 237 |
| GCA_010529435 | 10 | 60 | 58 | 66 | 6 | 65 | 16 | 155 | 237 |
| GCA_010539445 | 10 | 60 | 58 | 66 | 6 | 65 | 16 | 155 | 237 |
| GCA_010539915 | 10 | 60 | 58 | 66 | 6 | 65 | 16 | 155 | 237 |
| GCA_010541605 | 10 | 60 | 58 | 66 | 6 | 65 | 16 | 155 | 237 |
| GCA_010544305 | 157 | 141 | 17 | 16 | 33 | 13 | 4 | 504 | 380 |
| GCA_010544465 | 10 | 60 | 58 | 66 | 6 | 65 | 16 | 155 | 237 |
| GCA_010545445 | 10 | 60 | 58 | 66 | 6 | 65 | 16 | 155 | 237 |
| GCA_010547615 | 10 | 60 | 58 | 66 | 6 | 65 | 16 | 155 | 237 |
| GCA_010549625 | 10 | 60 | 58 | 66 | 6 | 65 | 16 | 155 | 237 |
| GCA_010551225 | 10 | 60 | 58 | 66 | 6 | 65 | 16 | 155 | 237 |
| GCA_010551665 | 10 | 60 | 58 | 66 | 6 | 65 | 16 | 155 | 237 |
| GCA_010552165 | 10 | 60 | 58 | 66 | 6 | 65 | 16 | 155 | 237 |
| GCA_010552445 | 10 | 60 | 58 | 66 | 6 | 65 | 16 | 155 | 237 |
| GCA_010561065 | 10 | 60 | 58 | 66 | 6 | 65 | 16 | 155 | 237 |
| GCA_010577525 | 10 | 60 | 58 | 66 | 6 | 65 | 16 | 155 | 237 |
| GCA_010580385 | 10 | 60 | 58 | 66 | 6 | 65 | 16 | 155 | 237 |
| GCA_010589395 | 10 | 60 | 58 | 66 | 6 | 65 | 16 | 155 | 237 |
| GCA_010602125 | 10 | 60 | 58 | 66 | 6 | 65 | 16 | 155 | 237 |
| GCA_010605925 | 10 | 60 | 58 | 66 | 6 | 65 | 16 | 155 | 237 |
| GCA_010607125 | 10 | 60 | 58 | 66 | 6 | 65 | 16 | 155 | 237 |
| GCA_010612785 | 10 | 60 | 58 | 66 | 6 | 65 | 16 | 155 | 237 |
| GCA_010614085 | 10 | 60 | 58 | 66 | 6 | 65 | 16 | 155 | 237 |
| GCA_010618765 | 10 | 60 | 58 | 66 | 6 | 65 | 16 | 155 | 237 |
| GCA_010627525 | 10 | 60 | 58 | 66 | 6 | 65 | 16 | 155 | 237 |
| GCA_010653865 | 10 | 60 | 58 | 66 | 6 | 65 | 16 | 155 | 237 |
| GCA_010658785 | 10 | 60 | 58 | 66 | 6 | 65 | 16 | 155 | 237 |
| GCA_010670165 | 10 | 60 | 58 | 66 | 6 | 65 | 16 | 155 | 237 |
| GCA_010671405 | 10 | 60 | 58 | 66 | 6 | 65 | 16 | 155 | 237 |
| GCA_010674945 | 10 | 60 | 58 | 66 | 6 | 65 | 16 | 155 | 237 |
| GCA_010679385 | 10 | 60 | 58 | 66 | 6 | 65 | 16 | 155 | 237 |
| GCA_010682775 | 10 | 60 | 58 | 66 | 6 | 65 | 16 | 155 | 237 |
| GCA_010683605 | 10 | 60 | 58 | 66 | 6 | 65 | 16 | 155 | 237 |
| GCA_010684345 | 10 | 60 | 58 | 66 | 6 | 65 | 16 | 155 | 237 |
| GCA_010689745 | 10 | 60 | 58 | 66 | 6 | 65 | 16 | 155 | 237 |
| GCA_010690585 | 10 | 60 | 58 | 66 | 6 | 65 | 16 | 155 | 237 |
| GCA_010691785 | 10 | 60 | 58 | 66 | 6 | 65 | 16 | 155 | 237 |
| GCA_010692285 | 10 | 60 | 58 | 66 | 6 | 65 | 16 | 155 | 237 |
| GCA_010716675 | 10 | 60 | 58 | 66 | 6 | 65 | 16 | 155 | 237 |
| GCA_010717115 | 10 | 60 | 58 | 66 | 6 | 65 | 16 | 155 | 237 |
| GCA_010718475 | 10 | 60 | 58 | 66 | 6 | 65 | 16 | 155 | 237 |
| GCA_010720255 | 10 | 60 | 58 | 66 | 6 | 65 | 16 | 155 | 237 |
| GCA_010727745 | 10 | 60 | 58 | 66 | 6 | 65 | 16 | 155 | 237 |
| GCA_010728385 | 10 | 60 | 58 | 66 | 6 | 65 | 16 | 155 | 237 |
| GCA_010729325 | 10 | 60 | 58 | 66 | 6 | 65 | 16 | 155 | 237 |
| GCA_010734295 | 10 | 60 | 58 | 66 | 6 | 65 | 16 | 155 | 237 |
| GCA_010749185 | 10 | 60 | 58 | 66 | 6 | 65 | 16 | 155 | 237 |
| GCA_010749755 | 157 | 141 | 17 | 16 | 33 | 13 | 4 | 504 | 380 |
| GCA_010754675 | 10 | 60 | 58 | 66 | 6 | 65 | 16 | 155 | 237 |
| GCA_010755395 | 10 | 60 | 58 | 66 | 6 | 65 | 16 | 155 | 237 |
| GCA_010756035 | 10 | 60 | 58 | 66 | 6 | 65 | 16 | 155 | 237 |
| GCA_010756555 | 10 | 60 | 58 | 66 | 6 | 65 | 16 | 155 | 237 |
| GCA_010760175 | 10 | 60 | 58 | 66 | 6 | 65 | 16 | 155 | 237 |
| GCA_010760365 | 10 | 60 | 58 | 66 | 6 | 65 | 16 | 155 | 237 |
| GCA_010760655 | 10 | 60 | 58 | 66 | 6 | 65 | 16 | 155 | 237 |
| GCA_010763155 | 10 | 60 | 58 | 66 | 6 | 65 | 16 | 155 | 237 |
| GCA_010763335 | 10 | 60 | 58 | 66 | 6 | 65 | 16 | 155 | 237 |
| GCA_010763635 | 10 | 60 | 58 | 66 | 6 | 65 | 16 | 155 | 237 |
| GCA_010764395 | 10 | 60 | 58 | 66 | 6 | 65 | 16 | 155 | 237 |
| GCA_010773955 | 10 | 60 | 58 | 66 | 6 | 65 | 16 | 155 | 237 |
| GCA_010778615 | 10 | 60 | 58 | 66 | 6 | 65 | 16 | 155 | 237 |
| GCA_010779295 | 10 | 60 | 58 | 66 | 6 | 65 | 16 | 155 | 237 |
| GCA_010781635 | 10 | 60 | 58 | 66 | 6 | 65 | 16 | 155 | 237 |
| GCA_010783255 | 10 | 60 | 58 | 66 | 6 | 65 | 16 | 155 | 237 |
| GCA_010795255 | 10 | 60 | 58 | 66 | 6 | 65 | 16 | 155 | 237 |
| GCA_010878645 | 10 | 60 | 58 | 66 | 6 | 65 | 16 | 155 | 237 |
| GCA_010881285 | 10 | 1020 | 58 | 66 | 6 | 65 | 16 | 7428 | - |
| GCA_010919595 | 10 | 60 | 58 | 66 | 6 | 65 | 16 | 155 | 237 |
| GCA_011105255 | 10 | 60 | 58 | 66 | 6 | 65 | 16 | 155 | 237 |
| GCA_011107015 | 10 | 60 | 58 | 66 | 6 | 65 | 16 | 155 | 237 |
| GCA_011113535 | 10 | 60 | 58 | 66 | 6 | 65 | 16 | 155 | 237 |
| GCA_011117315 | 10 | 60 | 58 | 66 | 6 | 65 | 16 | 155 | 237 |
| GCA_011122235 | 10 | 60 | 58 | 66 | 6 | 65 | 16 | 155 | 237 |
| GCA_011127575 | 10 | 60 | 58 | 66 | 6 | 65 | 16 | 155 | 237 |
| GCA_011153495 | 10 | 60 | 58 | 66 | 6 | 65 | 16 | 155 | 237 |
| GCA_011156195 | 10 | 60 | 58 | 66 | 6 | 65 | 16 | 155 | 237 |
| GCA_011158815 | 10 | 60 | 58 | 66 | 6 | 65 | 39 | 2124 | 237 |
| GCA_011159715 | 10 | 60 | 58 | 66 | 6 | 65 | 16 | 155 | 237 |
| GCA_011169025 | 10 | 60 | 58 | 66 | 6 | 65 | 16 | 155 | 237 |
| GCA_011182395 | 10 | 60 | 58 | 66 | 6 | 65 | 16 | 155 | 237 |
| GCA_011191015 | 10 | 60 | 58 | 66 | 6 | 65 | 16 | 155 | 237 |
| GCA_011247295 | 10 | 60 | 58 | 66 | 6 | 65 | 16 | 155 | 237 |
| GCA_011321055 | 10 | 60 | 58 | 66 | 6 | 65 | 16 | 155 | 237 |
| GCA_011340665 | 10 | 60 | 58 | 66 | 6 | 65 | 16 | 155 | 237 |
| GCA_011352425 | 10 | 60 | 58 | 66 | 6 | 65 | 16 | 155 | 237 |
| GCA_011398435 | 10 | 60 | 58 | 66 | 6 | 65 | 16 | 155 | 237 |
| GCA_011399475 | 10 | 60 | 58 | 66 | 6 | 65 | 16 | 155 | 237 |
| GCA_011400355 | 10 | 60 | 58 | 66 | 6 | 65 | 16 | 155 | 237 |
| GCA_011401995 | 10 | 60 | 58 | 66 | 6 | 65 | 16 | 155 | 237 |
| GCA_011412335 | 10 | 60 | 58 | 66 | 6 | 65 | 16 | 155 | 237 |
| GCA_011415795 | 10 | 60 | 58 | 66 | 6 | 65 | 16 | 155 | 237 |
| GCA_011415895 | 10 | 60 | 58 | 66 | 6 | 65 | 16 | 155 | 237 |
| GCA_011416475 | 10 | 60 | 58 | 66 | 6 | 65 | 16 | 155 | 237 |
| GCA_011420715 | 10 | 60 | 58 | 66 | 6 | 65 | 16 | 155 | 237 |
| GCA_011428215 | 10 | 60 | 58 | 66 | 6 | 65 | 16 | 155 | 237 |
| GCA_011432855 | 10 | 60 | 58 | 66 | 6 | 65 | 16 | 155 | 237 |
| GCA_011473255 | 10 | 60 | 58 | 66 | 6 | 65 | 16 | 155 | 237 |
| GCA_011635115 | 157 | 141 | 17 | 16 | 33 | 13 | 4 | 504 | 380 |
| GCA_013148745 | 10 | 60 | 58 | 66 | 6 | 65 | 16 | 155 | 237 |
| GCA_013499935 | 10 | 60 | 58 | 66 | 6 | 65 | 16 | 155 | 237 |
| GCA_013502165 | 10 | 60 | 58 | 66 | 6 | 65 | 16 | 155 | 237 |
| GCA_013567855 | 10 | 60 | 58 | 66 | 6 | 65 | 16 | 155 | 237 |
| GCA_013568535 | 10 | 60 | 58 | 66 | 6 | 65 | 16 | 155 | 237 |
| GCA_013569995 | 10 | 60 | 58 | 66 | 6 | 65 | 16 | 155 | 237 |
| GCA_013571175 | 10 | 60 | 58 | 66 | 6 | 65 | 16 | 155 | 237 |
| GCA_013680615 | 10 | 60 | 58 | 66 | 6 | 65 | 16 | 155 | 237 |
| GCA_013719185 | 10 | 60 | 58 | 66 | 6 | 65 | 16 | 155 | 237 |
| GCA_013720165 | 10 | 60 | 58 | 66 | 6 | 65 | 16 | 155 | 237 |
| GCA_013720785 | 10 | 60 | 58 | 66 | 6 | 65 | 16 | 155 | 237 |
| GCA_013801455 | 10 | 60 | 58 | 66 | 6 | 65 | 16 | 155 | 237 |
| GCA_013802225 | 10 | 60 | 58 | 66 | 6 | 65 | 16 | 155 | 237 |
| GCA_013915825 | 10 | 60 | 58 | 66 | 6 | 65 | 16 | 155 | 237 |
| GCA_014052665 | 10 | 60 | 58 | 66 | 6 | 65 | 16 | 155 | 237 |
| GCA_014150565 | 10 | 60 | 58 | 66 | 6 | 65 | 16 | 155 | 237 |
| GCA_014150825 | 10 | 60 | 58 | 66 | 6 | 65 | 16 | 155 | 237 |
| GCA_014214155 | 10 | 60 | 58 | 66 | 6 | 65 | 16 | 155 | 237 |
| GCA_014246575 | 10 | 60 | 58 | 66 | 6 | 65 | 16 | 155 | 237 |
| GCA_014259245 | 10 | 60 | 58 | 66 | 6 | 65 | 16 | 155 | 237 |
| GCA_014292575 | 10 | 60 | 58 | 66 | 6 | 65 | 16 | 155 | 237 |
| GCA_014342355 | 10 | 60 | 58 | 66 | 6 | 65 | 16 | 155 | 237 |
| GCA_014346565 | 10 | 60 | 58 | 66 | 6 | 65 | 16 | 155 | 237 |
| GCA_014347935 | 10 | 60 | 58 | 66 | 6 | 65 | 16 | 155 | 237 |
| GCA_014351155 | 10 | 60 | 58 | 66 | 6 | 65 | 16 | 155 | 237 |
| GCA_014364105 | 10 | 60 | 58 | 66 | 6 | 65 | 16 | 155 | 237 |
| GCA_014369745 | 10 | 60 | 58 | 66 | 6 | 65 | 16 | 155 | 237 |
| GCA_014394925 | 10 | 60 | 58 | 66 | 6 | 65 | 16 | 155 | 237 |
| GCA_014515705 | 10 | 60 | 58 | 66 | 6 | 65 | 16 | 155 | 237 |
| GCA_014523375 | 10 | 60 | 58 | 66 | 6 | 65 | 16 | 155 | 237 |
| GCA_014524585 | 10 | 60 | 58 | 66 | 6 | 65 | 16 | 155 | 237 |
| GCA_014524605 | 10 | 60 | 58 | 66 | 6 | 65 | 16 | 155 | 237 |
| GCA_014548505 | 10 | 60 | 58 | 66 | 6 | 65 | 16 | 155 | 237 |
| GCA_014548525 | 10 | 60 | 58 | 66 | 6 | 65 | 16 | 155 | 237 |
| GCA_014591255 | 10 | 60 | 58 | 66 | 6 | 65 | 16 | 155 | 237 |
| GCA_014598695 | 10 | 60 | 58 | 66 | 6 | 65 | 16 | 155 | 237 |
| GCA_014599535 | 10 | 60 | 58 | 66 | 6 | 65 | 16 | 155 | 237 |
| GCA_014666215 | 157 | 141 | 17 | 16 | 33 | 13 | 1297 | 8093 | - |
| GCA_014668595 | 10 | 60 | 58 | 66 | 6 | 65 | 16 | 155 | 237 |
| GCA_014680005 | 10 | 60 | 58 | 66 | 6 | 65 | 16 | 155 | 237 |
| GCA_014756165 | 10 | 60 | 58 | 66 | 6 | 65 | 16 | 155 | 237 |
| GCA_014758365 | 10 | 60 | 58 | 66 | 6 | 65 | 16 | 155 | 237 |
| GCA_014758385 | 10 | 60 | 58 | 66 | 6 | 65 | 16 | 155 | 237 |
| GCA_014760005 | 10 | 60 | 58 | 66 | 6 | 65 | 16 | 155 | 237 |
| GCA_014760105 | 10 | 60 | 58 | 66 | 6 | 65 | 16 | 155 | 237 |
| GCA_014760305 | 10 | 60 | 58 | 66 | 6 | 65 | 16 | 155 | 237 |
| GCA_014767215 | 10 | 60 | 58 | 66 | 6 | 65 | 16 | 155 | 237 |
| GCA_014769425 | 10 | 60 | 58 | 66 | 6 | 65 | 16 | 155 | 237 |
| GCA_014913865 | 10 | 60 | 58 | 66 | 6 | 65 | 16 | 155 | 237 |
| GCA_014917415 | 10 | 60 | 58 | 66 | 6 | 65 | 16 | 155 | 237 |
| GCA_014917855 | 10 | 60 | 58 | 66 | 6 | 65 | 16 | 155 | 237 |
| GCA_014929645 | 10 | 60 | 58 | 66 | 6 | 65 | 16 | 155 | 237 |
| GCA_014979625 | 10 | 60 | 58 | 66 | 6 | 65 | 16 | 155 | 237 |
| GCA_015054745 | 10 | 60 | 58 | 66 | 6 | 65 | 16 | 155 | 237 |
| GCA_015090925 | 10 | 60 | 58 | 66 | 6 | 65 | 16 | 155 | 237 |
| GCA_015173345 | 10 | 60 | 58 | 66 | 6 | 65 | 16 | 155 | 237 |
| GCA_015178085 | 10 | 60 | 58 | 66 | 6 | 65 | 16 | 155 | 237 |
| GCA_015178145 | 10 | 60 | 58 | 66 | 6 | 65 | 16 | 155 | 237 |
| GCA_015187585 | 10 | 60 | 58 | 66 | 6 | 65 | 16 | 155 | 237 |
| GCA_015201105 | 10 | 60 | 58 | 66 | 6 | 65 | 16 | 155 | 237 |
| GCA_015225275 | 10 | 60 | 58 | 66 | 6 | 65 | 16 | 155 | 237 |
| GCA_015238125 | 10 | 60 | 58 | 66 | 6 | 65 | 16 | 155 | 237 |
| GCA_015242285 | 10 | 60 | 58 | 66 | 6 | 65 | 16 | 155 | 237 |
| GCA_015243735 | 10 | 60 | 58 | 66 | 6 | 65 | 16 | 155 | 237 |
| GCA_015528205 | 10 | 60 | 58 | 66 | 6 | 65 | 16 | 155 | 237 |
| GCA_015729425 | 10 | 60 | 58 | 66 | 6 | 65 | 16 | 155 | 237 |
| GCA_016057835 | 10 | 60 | 58 | 66 | 6 | 65 | 16 | 155 | 237 |
| GCA_016096735 | 10 | 60 | 58 | 66 | 6 | 65 | 16 | 155 | 237 |
| GCA_016105125 | 10 | 60 | 58 | 66 | 6 | 65 | 16 | 155 | 237 |
| GCA_016105305 | 10 | 60 | 58 | 66 | 6 | 65 | 16 | 155 | 237 |
| GCA_016406855 | 10 | 60 | 58 | 66 | 6 | 65 | 16 | 155 | 237 |
| GCA_016406935 | 10 | 60 | 58 | 66 | 6 | 65 | 16 | 155 | 237 |
| GCA_016407775 | 10 | 60 | 58 | 66 | 6 | 65 | 16 | 155 | 237 |
| GCA_016407945 | 10 | 60 | 58 | 66 | 6 | 65 | 16 | 155 | 237 |
| GCA_016407985 | 10 | 60 | 58 | 66 | 6 | 65 | 16 | 155 | 237 |
| GCA_016408165 | 10 | 60 | 58 | 66 | 6 | 65 | 16 | 155 | 237 |
| GCA_016408245 | 10 | 60 | 58 | 66 | 6 | 65 | 16 | 155 | 237 |
| GCA_016408465 | 10 | 60 | 58 | 66 | 6 | 65 | 16 | 155 | 237 |
| GCA_016408785 | 10 | 60 | 58 | 66 | 6 | 65 | 16 | 155 | 237 |
| GCA_016409095 | 10 | 60 | 58 | 66 | 6 | 65 | 16 | 155 | 237 |
| GCA_016409935 | 10 | 60 | 58 | 66 | 6 | 65 | 16 | 155 | 237 |
| GCA_016410765 | 10 | 60 | 58 | 66 | 6 | 65 | 16 | 155 | 237 |
| GCA_016411165 | 10 | 60 | 58 | 66 | 6 | 65 | 16 | 155 | 237 |
| GCA_016412065 | 10 | 60 | 58 | 66 | 6 | 65 | 16 | 155 | 237 |
| GCA_016412075 | 10 | 60 | 58 | 66 | 6 | 65 | 16 | 155 | 237 |
| GCA_016412665 | 10 | 60 | 58 | 66 | 6 | 65 | 16 | 155 | 237 |
| GCA_016417885 | 10 | 60 | 58 | 66 | 6 | 65 | 16 | 155 | 237 |
| GCA_016418085 | 10 | 60 | 58 | 66 | 6 | 65 | 16 | 155 | 237 |
| GCA_016418305 | 10 | 60 | 58 | 66 | 6 | 65 | 16 | 155 | 237 |
| GCA_016418315 | 10 | 60 | 58 | 66 | 6 | 65 | 16 | 155 | 237 |
| GCA_016418705 | 10 | 60 | 58 | 66 | 6 | 65 | 16 | 155 | 237 |
| GCA_016419545 | 10 | 60 | 58 | 66 | 6 | 65 | 16 | 155 | 237 |
| GCA_016419575 | 10 | 60 | 58 | 66 | 6 | 65 | 16 | 155 | 237 |
| GCA_016419605 | 10 | 60 | 58 | 66 | 6 | 65 | 16 | 155 | 237 |
| GCA_016419815 | 10 | 60 | 58 | 66 | 6 | 65 | 16 | 155 | 237 |
| GCA_016420855 | 10 | 60 | 58 | 66 | 6 | 65 | 16 | 155 | 237 |
| GCA_016420925 | 10 | 60 | 58 | 66 | 6 | 65 | 16 | 155 | 237 |
| GCA_016420975 | 10 | 60 | 58 | 66 | 6 | 65 | 16 | 155 | 237 |
| GCA_016422095 | 10 | 60 | 58 | 66 | 6 | 65 | 16 | 155 | 237 |
| GCA_016422345 | 10 | 60 | 58 | 66 | 6 | 65 | 16 | 155 | 237 |
| GCA_016422455 | 10 | 60 | 58 | 66 | 6 | 65 | 16 | 155 | 237 |
| GCA_016422555 | 10 | 60 | 58 | 66 | 6 | 65 | 16 | 155 | 237 |
| GCA_016423045 | 10 | 60 | 804 | 66 | 6 | 65 | 16 | 5799 | - |
| GCA_016423345 | 10 | 60 | 58 | 66 | 6 | 65 | 16 | 155 | 237 |
| GCA_016423485 | 10 | 60 | 58 | 66 | 6 | 65 | 16 | 155 | 237 |
| GCA_016423855 | 10 | 60 | 58 | 66 | 6 | 65 | 16 | 155 | 237 |
| GCA_016423955 | 10 | 60 | 58 | 66 | 6 | 65 | 16 | 155 | 237 |
| GCA_016424165 | 10 | 60 | 58 | 66 | 6 | 65 | 16 | 155 | 237 |
| GCA_016424225 | 10 | 60 | 58 | 66 | 6 | 65 | 16 | 155 | 237 |
| GCA_016424335 | 10 | 60 | 58 | 66 | 6 | 65 | 16 | 155 | 237 |
| GCA_016426665 | 10 | 60 | 58 | 66 | 6 | 65 | 16 | 155 | 237 |
| GCA_016426675 | 10 | 60 | 58 | 66 | 6 | 65 | 16 | 155 | 237 |
| GCA_016426725 | 10 | 60 | 58 | 66 | 6 | 65 | 16 | 155 | 237 |
| GCA_016426825 | 10 | 60 | 58 | 66 | 6 | 65 | 16 | 155 | 237 |
| GCA_016433425 | 10 | 60 | 58 | 66 | 6 | 65 | 16 | 155 | 237 |
| GCA_016452025 | 10 | 60 | 58 | 66 | 6 | 65 | 16 | 155 | 237 |
| GCA_016461245 | 10 | 60 | 58 | 66 | 6 | 65 | 16 | 155 | 237 |
| GCA_016465735 | 10 | 60 | 58 | 66 | 6 | 65 | 16 | 155 | 237 |
| GCA_016626505 | 10 | 60 | 58 | 66 | 6 | 65 | 16 | 155 | 237 |
| GCA_016741615 | 10 | 60 | 58 | 66 | 6 | 65 | 16 | 155 | 237 |
| GCA_016962815 | 10 | 60 | 58 | 66 | 6 | 65 | 16 | 155 | 237 |
| GCA_016963095 | 10 | 60 | 58 | 902 | 6 | 65 | 16 | 3838 | 237 |
| GCA_016992715 | 10 | 60 | 58 | 66 | 6 | 65 | 16 | 155 | 237 |
| GCA_017026715 | 10 | 60 | 58 | 66 | 6 | 65 | 16 | 155 | 237 |
| GCA_017037015 | 10 | 60 | 58 | 66 | 6 | 65 | 16 | 155 | 237 |
| GCA_017078455 | 10 | 60 | 58 | 66 | 6 | 65 | 16 | 155 | 237 |
| GCA_017080115 | 10 | 60 | 58 | 66 | 6 | 65 | 16 | 155 | 237 |
| GCA_017109785 | 10 | 60 | 58 | 66 | 6 | 65 | 16 | 155 | 237 |
| GCA_017110245 | 10 | 60 | 58 | 66 | 6 | 65 | 16 | 155 | 237 |
| GCA_017121465 | 10 | 60 | 58 | 66 | 6 | 65 | 16 | 155 | 237 |
| GCA_017121765 | 10 | 60 | 58 | 66 | 6 | 65 | 16 | 155 | 237 |
| GCA_017182555 | 10 | 60 | 58 | 66 | 6 | 65 | 16 | 155 | 237 |
| GCA_017192195 | 10 | 60 | 58 | 66 | 6 | 65 | 16 | 155 | 237 |
| GCA_017234915 | 10 | 60 | 58 | 66 | 6 | 65 | 16 | 155 | 237 |
| GCA_017253475 | 10 | 60 | 58 | 66 | 6 | 65 | 16 | 155 | 237 |
| GCA_017253615 | 10 | 60 | 58 | 66 | 6 | 65 | 16 | 155 | 237 |
| GCA_017265615 | 10 | 60 | 58 | 66 | 6 | 65 | 39 | 2124 | 237 |
| GCA_017363845 | 10 | 60 | 58 | 66 | 6 | 65 | 16 | 155 | 237 |
| GCA_017576635 | 10 | 60 | 58 | 66 | 6 | 65 | 16 | 155 | 237 |
| GCA_017606205 | 10 | 60 | 58 | 66 | 6 | 65 | 16 | 155 | 237 |
| GCA_017712675 | 10 | 60 | 58 | 66 | 6 | 65 | 16 | 155 | 237 |
| GCA_017817175 | 10 | 60 | 58 | 66 | 6 | 65 | 16 | 155 | 237 |
| GCA_017894245 | 10 | 60 | 58 | 66 | 6 | 65 | 16 | 155 | 237 |
| GCA_018077825 | 10 | 60 | 58 | 66 | 6 | 65 | 16 | 155 | 237 |
| GCA_018188375 | 10 | 60 | 58 | 66 | 6 | 65 | 16 | 155 | 237 |
| GCA_018216455 | 10 | 60 | 58 | 66 | 6 | 65 | 16 | 155 | 237 |
| GCA_018229725 | 10 | 60 | 58 | 66 | 6 | 65 | 16 | 155 | 237 |
| GCA_018298225 | 10 | 60 | 58 | 66 | 6 | 65 | 16 | 155 | 237 |
| GCA_018298325 | 10 | 60 | 58 | 66 | 6 | 65 | 16 | 155 | 237 |
| GCA_018338335 | 10 | 60 | 58 | 66 | 6 | 65 | 16 | 155 | 237 |
| GCA_018352615 | 10 | 60 | 58 | 66 | 6 | 65 | 16 | 155 | 237 |
| GCA_018464245 | 10 | 60 | 58 | 66 | 6 | 65 | 16 | 155 | 237 |
| GCA_018485185 | 10 | 60 | 58 | 66 | 6 | 65 | 16 | 155 | 237 |
| GCA_018838335 | 10 | 60 | 58 | 66 | 6 | 65 | 16 | 155 | 237 |
| GCA_019077665 | 10 | 60 | 58 | 66 | 6 | 65 | 16 | 155 | 237 |
| GCA_019111545 | 10 | 60 | 58 | 66 | 6 | 65 | 16 | 155 | 237 |
| GCA_019140615 | 10 | 60 | 58 | 66 | 6 | 65 | 16 | 155 | 237 |
| GCA_019222665 | 10 | 60 | 58 | 66 | 6 | 65 | 16 | 155 | 237 |
| GCA_019270655 | 10 | 60 | 58 | 66 | 6 | 65 | 16 | 155 | 237 |
| GCA_019278235 | 10 | 60 | 58 | 66 | 6 | 65 | 16 | 155 | 237 |
| GCA_019282975 | 10 | 60 | 58 | 66 | 6 | 65 | 16 | 155 | 237 |
| GCA_019328705 | 10 | 60 | 58 | 66 | 6 | 65 | 16 | 155 | 237 |
| GCA_019345725 | 10 | 60 | 58 | 66 | 6 | 65 | 16 | 155 | 237 |
| GCA_019376495 | 10 | 60 | 58 | 66 | 6 | 65 | 16 | 155 | 237 |
| GCA_019465635 | 10 | 60 | 58 | 66 | 6 | 65 | 16 | 155 | 237 |
| GCA_019598405 | 10 | 60 | 58 | 66 | 6 | 65 | 16 | 155 | 237 |
| GCA_019598445 | 10 | 60 | 58 | 66 | 6 | 65 | 16 | 155 | 237 |
| GCA_019666985 | 10 | 60 | 58 | 66 | 6 | 65 | 16 | 155 | 237 |
| GCA_019707615 | 10 | 60 | 58 | 66 | 6 | 65 | 16 | 155 | 237 |
| GCA_019805265 | 10 | 60 | 58 | 66 | 6 | 65 | 16 | 155 | 237 |
| GCA_019815825 | 10 | 60 | 58 | 66 | 6 | 65 | 16 | 155 | 237 |
| GCA_019826285 | 10 | 60 | 58 | 66 | 6 | 65 | 16 | 155 | 237 |
| GCA_019874225 | 10 | 60 | 58 | 66 | 6 | 65 | 16 | 155 | 237 |
| GCA_019896715 | 10 | 60 | 58 | 66 | 6 | 65 | 16 | 155 | 237 |
| GCA_019897035 | 10 | 60 | 58 | 66 | 6 | 65 | 16 | 155 | 237 |
| GCA_019914745 | 10 | 60 | 58 | 66 | 6 | 65 | 16 | 155 | 237 |
| GCA_019914785 | 10 | 60 | 58 | 66 | 6 | 65 | 16 | 155 | 237 |
| GCA_019917005 | 10 | 60 | 58 | 66 | 6 | 65 | 16 | 155 | 237 |
| GCA_019953275 | 10 | 60 | 58 | 66 | 6 | 65 | 16 | 155 | 237 |
| GCA_019968135 | 10 | 60 | 58 | 66 | 6 | 65 | 16 | 155 | 237 |
| GCA_020015035 | 10 | 60 | 58 | 66 | 6 | 65 | 16 | 155 | 237 |
| GCA_020133405 | 10 | 60 | 58 | 66 | 6 | 65 | 16 | 155 | 237 |
| GCA_020234525 | 10 | 60 | 58 | 66 | 6 | 65 | 16 | 155 | 237 |
| GCA_020453505 | 10 | 60 | 58 | 66 | 6 | 1233 | 16 | 8898 | - |
| GCA_020551605 | 10 | 60 | 58 | 66 | 6 | 65 | 16 | 155 | 237 |
| GCA_020606335 | 10 | 60 | 58 | 66 | 6 | 65 | 16 | 155 | 237 |
| GCA_020712875 | 10 | 60 | 58 | 66 | 6 | 65 | 16 | 155 | 237 |
| GCA_020759775 | 10 | 60 | 58 | 66 | 6 | 65 | 16 | 155 | 237 |
| GCA_020761275 | 10 | 60 | 58 | 66 | 6 | 65 | 16 | 155 | 237 |
| GCA_020805145 | 10 | 60 | 58 | 66 | 6 | 65 | 16 | 155 | 237 |
| GCA_020921515 | 10 | 60 | 58 | 66 | 6 | 65 | 16 | 155 | 237 |
| GCA_020974225 | 10 | 60 | 58 | 66 | 6 | 65 | 16 | 155 | 237 |
| GCA_021003215 | 10 | 60 | 58 | 66 | 6 | 65 | 16 | 155 | 237 |
| GCA_021007255 | 10 | 60 | 58 | 66 | 6 | 65 | 16 | 155 | 237 |
| GCA_021013955 | 10 | 60 | 58 | 66 | 6 | 65 | 16 | 155 | 237 |
| GCA_021058645 | 10 | 60 | 58 | 66 | 6 | 65 | 16 | 155 | 237 |
| GCA_021181945 | 10 | 60 | 58 | 66 | 6 | 65 | 16 | 155 | 237 |
| GCA_021183145 | 10 | 60 | 58 | 66 | 6 | 65 | 16 | 155 | 237 |
| GCA_021190115 | 10 | 60 | 58 | 66 | 6 | 65 | 16 | 155 | 237 |
| GCA_021223665 | 10 | 60 | 58 | 66 | 6 | 65 | 16 | 155 | 237 |
| GCA_021280465 | 10 | 60 | 58 | 66 | 6 | 65 | 16 | 155 | 237 |
| GCA_021347765 | 10 | 60 | 58 | 66 | 6 | 65 | 16 | 155 | 237 |
| GCA_021349975 | 10 | 60 | 58 | 66 | 6 | 65 | 16 | 155 | 237 |
| GCA_021351615 | 10 | 60 | 58 | 66 | 6 | 65 | 16 | 155 | 237 |
| GCA_021400995 | 10 | 60 | 58 | 66 | 6 | 65 | 16 | 155 | 237 |
| GCA_021401645 | 10 | 60 | 58 | 66 | 6 | 65 | 16 | 155 | 237 |
| GCA_021450665 | 10 | 60 | 58 | 66 | 6 | 65 | 16 | 155 | 237 |
| GCA_021488075 | 10 | 60 | 58 | 66 | 6 | 65 | 16 | 155 | 237 |
| GCA_021505235 | 10 | 60 | 58 | 66 | 6 | 65 | 16 | 155 | 237 |
| GCA_021755825 | 10 | 60 | 58 | 66 | 6 | 65 | 16 | 155 | 237 |
| GCA_021758765 | 10 | 60 | 58 | 66 | 6 | 65 | 16 | 155 | 237 |
| GCA_021867955 | 10 | 60 | 58 | 66 | 6 | 65 | 16 | 155 | 237 |
| GCA_021868195 | 10 | 60 | 58 | 66 | 6 | 65 | 16 | 155 | 237 |
| GCA_022046305 | 10 | 60 | 58 | 66 | 6 | 65 | 16 | 155 | 237 |
| GCA_022328765 | 10 | 60 | 58 | 66 | 6 | 65 | 16 | 155 | 237 |
| GCA_022357135 | 10 | 60 | 58 | 66 | 6 | 65 | 16 | 155 | 237 |
| GCA_022365375 | 10 | 60 | 58 | 66 | 6 | 65 | 16 | 155 | 237 |
| GCA_022417975 | 10 | 60 | 58 | 66 | 6 | 65 | 16 | 155 | 237 |
| GCA_022604995 | 10 | 60 | 58 | 66 | 6 | 65 | 16 | 155 | 237 |
| GCA_022660115 | 10 | 60 | 58 | 66 | 6 | 65 | 16 | 155 | 237 |
| GCA_022912655 | 10 | 60 | 58 | 66 | 6 | 65 | 16 | 155 | 237 |
| GCA_022919555 | 10 | 60 | 58 | 66 | 6 | 65 | 16 | 155 | 237 |
| GCA_022938995 | 10 | 60 | 58 | 66 | 6 | 65 | 16 | 155 | 237 |
| GCA_022950195 | 10 | 60 | 58 | 66 | 6 | 65 | 16 | 155 | 237 |
| GCA_022958715 | 10 | 60 | 58 | 66 | 6 | 65 | 16 | 155 | 237 |
| GCA_022995025 | 10 | 60 | 58 | 66 | 6 | 65 | 16 | 155 | 237 |
| GCA_023018405 | 10 | 60 | 58 | 66 | 6 | 65 | 16 | 155 | 237 |
| GCA_023020805 | 10 | 60 | 58 | 66 | 6 | 65 | 16 | 155 | 237 |
| GCA_023045135 | 10 | 60 | 58 | 66 | 6 | 65 | 16 | 155 | 237 |
| GCA_023046675 | 10 | 60 | 58 | 66 | 6 | 65 | 16 | 155 | 237 |
| GCA_023092205 | 10 | 60 | 58 | 66 | 6 | 65 | 16 | 155 | 237 |
| GCA_023102695 | 10 | 60 | 58 | 66 | 6 | 65 | 16 | 155 | 237 |
| GCA_023179455 | 10 | 60 | 58 | 66 | 6 | 65 | 16 | 155 | 237 |
| GCA_023193375 | 10 | 60 | 58 | 66 | 6 | 65 | 16 | 155 | 237 |
| GCA_023201915 | 10 | 60 | 58 | 66 | 6 | 65 | 16 | 155 | 237 |
| GCA_023282805 | 10 | 60 | 58 | 66 | 6 | 65 | 16 | 155 | 237 |
| GCA_023282835 | 10 | 60 | 58 | 66 | 6 | 65 | 16 | 155 | 237 |
| GCA_023282905 | 10 | 60 | 58 | 66 | 6 | 65 | 16 | 155 | 237 |
| GCA_023289545 | 10 | 60 | 58 | 66 | 6 | 65 | 16 | 155 | 237 |
| GCA_023373085 | 10 | 60 | 58 | 66 | 6 | 65 | 16 | 155 | 237 |
| GCA_023408905 | 10 | 60 | 58 | 66 | 6 | 65 | 16 | 155 | 237 |
| GCA_023493365 | 10 | 60 | 58 | 66 | 6 | 65 | 16 | 155 | 237 |
| GCA_023502085 | 10 | 60 | 58 | 66 | 6 | 65 | 16 | 155 | 237 |
| GCA_023526245 | 10 | 60 | 58 | 66 | 6 | 65 | 16 | 155 | 237 |
| GCA_023529735 | 10 | 60 | 58 | 66 | 6 | 65 | 16 | 155 | 237 |
| GCA_023531675 | 10 | 60 | 58 | 66 | 6 | 65 | 16 | 155 | 237 |
| GCA_023759135 | 10 | 60 | 58 | 66 | 6 | 65 | 16 | 155 | 237 |
| GCA_023763525 | 10 | 60 | 58 | 66 | 6 | 65 | 16 | 155 | 237 |
| GCA_023769165 | 10 | 60 | 58 | 66 | 6 | 65 | 16 | 155 | 237 |
| GCA_023967535 | 10 | 60 | 58 | 66 | 6 | 65 | 16 | 155 | 237 |
| GCA_023985415 | 10 | 60 | 58 | 66 | 6 | 65 | 16 | 155 | 237 |
| GCA_023985615 | 10 | 60 | 58 | 66 | 6 | 65 | 16 | 155 | 237 |
| GCA_024000315 | 10 | 60 | 58 | 66 | 6 | 65 | 16 | 155 | 237 |
| GCA_024095945 | 10 | 60 | 58 | 66 | 6 | 65 | 16 | 155 | 237 |
| GCA_024099955 | 10 | 60 | 58 | 66 | 6 | 65 | 16 | 155 | 237 |
| GCA_024108975 | 10 | 60 | 58 | 66 | 6 | 65 | 16 | 155 | 237 |
| GCA_024189795 | 10 | 60 | 58 | 66 | 6 | 65 | 16 | 155 | 237 |
| GCA_024195505 | 10 | 60 | 58 | 66 | 6 | 65 | 16 | 155 | 237 |
| GCA_024266345 | 10 | 60 | 58 | 66 | 6 | 65 | 16 | 155 | 237 |
| GCA_024396255 | 10 | 60 | 58 | 66 | 6 | 65 | 16 | 155 | 237 |
| GCA_024415475 | 10 | 60 | 58 | 66 | 6 | 65 | 16 | 155 | 237 |
| GCA_024525115 | 10 | 60 | 58 | 66 | 6 | 65 | 16 | 155 | 237 |
| GCA_024525135 | 10 | 60 | 58 | 66 | 6 | 65 | 16 | 155 | 237 |
| GCA_024596695 | 10 | 60 | 58 | 66 | 6 | 65 | 16 | 155 | 237 |
| GCA_024611235 | 10 | 60 | 58 | 66 | 6 | 65 | 16 | 155 | 237 |
| GCA_024658235 | 10 | 60 | 58 | 66 | 6 | 65 | 16 | 155 | 237 |
| GCA_024820285 | 10 | 60 | 58 | 66 | 6 | 65 | 16 | 155 | 237 |
| GCA_024858485 | 10 | 60 | 58 | 66 | 6 | 65 | 16 | 155 | 237 |
| GCA_024890175 | 10 | 60 | 58 | 66 | 6 | 65 | 16 | 155 | 237 |
| GCA_024890495 | 10 | 60 | 58 | 66 | 6 | 65 | 16 | 155 | 237 |
| GCA_024893805 | 10 | 60 | 58 | 66 | 6 | 65 | 16 | 155 | 237 |
| GCA_024893975 | 10 | 60 | 58 | 66 | 6 | 65 | 16 | 155 | 237 |
| GCA_024907595 | 10 | 60 | 58 | 66 | 6 | 65 | 16 | 155 | 237 |
| GCA_024908175 | 10 | 60 | 58 | 66 | 6 | 65 | 16 | 155 | 237 |
| GCA_024933285 | 10 | 60 | 58 | 66 | 6 | 65 | 16 | 155 | 237 |
| GCA_024967845 | 10 | 60 | 58 | 66 | 6 | 65 | 16 | 155 | 237 |
| GCA_024991415 | 10 | 60 | 58 | 66 | 6 | 65 | 16 | 155 | 237 |
| GCA_025022045 | 10 | 60 | 58 | 66 | 6 | 65 | 16 | 155 | 237 |
| GCA_025080575 | 157 | 141 | 17 | 16 | 33 | 13 | 4 | 504 | 380 |
| GCA_025574665 | 10 | 60 | 58 | 66 | 6 | 65 | 16 | 155 | 237 |
| GCA_025619665 | 10 | 60 | 58 | 66 | 6 | 65 | 16 | 155 | 237 |
| GCA_025620585 | 10 | 60 | 58 | 66 | 6 | 65 | 16 | 155 | 237 |
| GCA_025643195 | 10 | 60 | 58 | 66 | 6 | 65 | 16 | 155 | 237 |
| GCA_025648075 | 10 | 60 | 58 | 66 | 6 | 65 | 16 | 155 | 237 |
| GCA_025650955 | 10 | 60 | 58 | 66 | 6 | 65 | 16 | 155 | 237 |
| GCA_025664195 | 10 | 60 | 58 | 66 | 6 | 65 | 16 | 155 | 237 |
| GCA_025731055 | 10 | 60 | 58 | 66 | 6 | 65 | 16 | 155 | 237 |
| GCA_025733275 | 10 | 60 | 58 | 66 | 6 | 65 | 16 | 155 | 237 |
| GCA_025733455 | 10 | 60 | 58 | 66 | 6 | 65 | 16 | 155 | 237 |
| GCA_025733515 | 10 | 60 | 58 | 66 | 6 | 65 | 16 | 155 | 237 |
| GCA_025736735 | 10 | 60 | 58 | 66 | 6 | 65 | 16 | 155 | 237 |
| GCA_025737135 | 10 | 60 | 58 | 66 | 6 | 65 | 16 | 155 | 237 |
| GCA_025763975 | 10 | 60 | 58 | 66 | 6 | 65 | 16 | 155 | 237 |
| GCA_025893895 | 10 | 60 | 58 | 66 | 6 | 65 | 16 | 155 | 237 |
| GCA_025967745 | 10 | 60 | 58 | 66 | 6 | 65 | 16 | 155 | 237 |
| GCA_025977925 | 10 | 60 | 58 | 66 | 6 | 65 | 16 | 155 | 237 |
| GCA_025978485 | 10 | 60 | 58 | 66 | 6 | 65 | 16 | 155 | 237 |
| GCA_026052375 | 10 | 60 | 58 | 66 | 6 | 65 | 16 | 155 | 237 |
| GCA_026054455 | 10 | 60 | 58 | 66 | 6 | 65 | 16 | 155 | 237 |
| GCA_026187235 | 10 | 60 | 58 | 66 | 6 | 65 | 16 | 155 | 237 |
| GCA_026192295 | 10 | 60 | 58 | 66 | 6 | 65 | 16 | 155 | 237 |
| GCA_026209675 | 10 | 60 | 58 | 66 | 6 | 65 | 16 | 155 | 237 |
| GCA_026290665 | 10 | 60 | 58 | 66 | 6 | 65 | 16 | 155 | 237 |
| GCA_026370695 | 10 | 60 | 58 | 66 | 6 | 65 | 16 | 155 | 237 |
| GCA_026484845 | 10 | 60 | 58 | 66 | 6 | 65 | 16 | 155 | 237 |
| GCA_026531275 | 10 | 60 | 58 | 66 | 6 | 65 | 16 | 155 | 237 |
| GCA_026578325 | 10 | 60 | 58 | 66 | 6 | 65 | 16 | 155 | 237 |
| GCA_026734215 | 10 | 60 | 58 | 66 | 6 | 65 | 16 | 155 | 237 |
| GCA_026769955 | 10 | 60 | 58 | 66 | 6 | 65 | 16 | 155 | 237 |
| GCA_027099975 | 10 | 60 | 58 | 66 | 6 | 65 | 16 | 155 | 237 |
| GCA_027148305 | 10 | 60 | 58 | 66 | 6 | 65 | 16 | 155 | 237 |
| GCA_027173105 | 10 | 60 | 58 | 66 | 6 | 65 | 16 | 155 | 237 |
| GCA_027241885 | 10 | 60 | 58 | 66 | 6 | 65 | 16 | 155 | 237 |
| GCA_027242145 | 10 | 60 | 58 | 66 | 6 | 65 | 16 | 155 | 237 |
| GCA_027265615 | 10 | 60 | 58 | 66 | 6 | 65 | 16 | 155 | 237 |
| GCA_027306005 | 10 | 60 | 58 | 66 | 6 | 65 | 16 | 155 | 237 |
| GCA_027902295 | 10 | 60 | 58 | 66 | 6 | 65 | 16 | 155 | 237 |
| GCA_027918615 | 10 | 60 | 58 | 66 | 6 | 65 | 16 | 155 | 237 |
| GCA_028014925 | 10 | 60 | 58 | 66 | 6 | 65 | 16 | 155 | 237 |
| GCA_028036335 | 10 | 60 | 58 | 66 | 6 | 65 | 16 | 155 | 237 |
| GCA_028173785 | 10 | 60 | 58 | 66 | 6 | 65 | 16 | 155 | 237 |
| GCA_028215855 | 10 | 60 | 58 | 66 | 6 | 65 | 16 | 155 | 237 |
| GCA_028302325 | 10 | 60 | 58 | 66 | 6 | 65 | 16 | 155 | 237 |
| GCA_028431225 | 10 | 60 | 58 | 66 | 6 | 65 | 16 | 155 | 237 |
| GCA_028461285 | 10 | 60 | 58 | 66 | 6 | 65 | 16 | 155 | 237 |
| GCA_028514205 | 10 | 60 | 58 | 66 | 6 | 65 | 16 | 155 | 237 |
| GCA_028540185 | 10 | 60 | 58 | 66 | 6 | 65 | 16 | 155 | 237 |
| GCA_028574675 | 10 | 60 | 58 | 66 | 6 | 65 | 16 | 155 | 237 |
| GCA_028623105 | 10 | 60 | 58 | 66 | 6 | 65 | 16 | 155 | 237 |
| GCA_028623125 | 10 | 60 | 58 | 66 | 6 | 65 | 16 | 155 | 237 |
| GCA_028623145 | 10 | 60 | 58 | 66 | 6 | 65 | 16 | 155 | 237 |
| GCA_028762145 | 10 | 60 | 58 | 66 | 6 | 65 | 16 | 155 | 237 |
| GCA_028862075 | 10 | 60 | 58 | 66 | 6 | 65 | 16 | 155 | 237 |
| GCA_028957565 | 10 | 60 | 58 | 66 | 6 | 65 | 16 | 155 | 237 |
| GCA_028997725 | 10 | 60 | 58 | 66 | 6 | 65 | 16 | 155 | 237 |
| GCA_029173325 | 10 | 60 | 58 | 66 | 6 | 65 | 16 | 155 | 237 |
| GCA_029188185 | 10 | 60 | 58 | 66 | 6 | 65 | 16 | 155 | 237 |
| GCA_029216615 | 10 | 60 | 58 | 66 | 6 | 65 | 16 | 155 | 237 |
| GCA_029221885 | 10 | 60 | 58 | 66 | 6 | 65 | 16 | 155 | 237 |
| GCA_029334495 | 10 | 60 | 58 | 66 | 6 | 65 | 16 | 155 | 237 |
| GCA_029337855 | 10 | 60 | 58 | 66 | 6 | 65 | 16 | 155 | 237 |
| GCA_029376775 | 10 | 60 | 58 | 66 | 6 | 65 | 16 | 155 | 237 |
| GCA_029376925 | 10 | 60 | 58 | 66 | 6 | 65 | 16 | 155 | 237 |
| GCA_029588535 | 10 | 60 | 58 | 66 | 6 | 65 | 16 | 155 | 237 |
| GCA_029590195 | 10 | 60 | 58 | 66 | 6 | 65 | 16 | 155 | 237 |
| GCA_029617285 | 10 | 60 | 58 | 66 | 6 | 65 | 16 | 155 | 237 |
| GCA_029663185 | 10 | 60 | 58 | 66 | 6 | 65 | 16 | 155 | 237 |
| GCA_029832895 | 10 | 60 | 58 | 66 | 6 | 65 | 16 | 155 | 237 |
| GCA_030231945 | 10 | 60 | 58 | 66 | 6 | 65 | 16 | 155 | 237 |
| GCA_030232905 | 10 | 60 | 58 | 66 | 6 | 65 | 16 | 155 | 237 |
| GCA_030233545 | 10 | 60 | 58 | 66 | 6 | 65 | 16 | 155 | 237 |
| GCA_030233605 | 10 | 60 | 58 | 66 | 6 | 65 | 16 | 155 | 237 |
| GCA_030233665 | 10 | 60 | 58 | 66 | 6 | 65 | 16 | 155 | 237 |
| GCA_030887305 | 10 | 60 | 58 | 66 | 6 | 65 | 16 | 155 | 237 |
| GCA_030904675 | 10 | 60 | 58 | 66 | 6 | 65 | 16 | 155 | 237 |
| GCA_031326525 | 10 | 60 | 58 | 66 | 6 | 65 | 16 | 155 | 237 |
| GCA_031326705 | 10 | 60 | 58 | 66 | 6 | 65 | 16 | 155 | 237 |
| GCA_031344555 | 10 | 60 | 58 | 66 | 6 | 65 | 16 | 155 | 237 |
| GCA_031450655 | 10 | 60 | 58 | 66 | 6 | 65 | 16 | 155 | 237 |
| GCA_031485835 | 10 | 60 | 58 | 66 | 6 | 65 | 16 | 155 | 237 |
| GCA_031658835 | 10 | 60 | 58 | 66 | 6 | 65 | 16 | 155 | 237 |
| GCA_031776855 | 10 | 60 | 58 | 66 | 6 | 65 | 16 | 155 | 237 |
| GCA_031894395 | 10 | 60 | 58 | 66 | 6 | 65 | 16 | 155 | 237 |
| GCA_031916825 | 10 | 60 | 58 | 66 | 6 | 65 | 16 | 155 | 237 |
| GCA_032206265 | 10 | 60 | 58 | 66 | 6 | 65 | 16 | 155 | 237 |
| GCA_032235255 | 10 | 60 | 58 | 66 | 6 | 65 | 16 | 155 | 237 |
| GCA_032235275 | 10 | 60 | 58 | 66 | 6 | 65 | 16 | 155 | 237 |
| GCA_032277205 | 10 | 60 | 58 | 66 | 6 | 65 | 16 | 155 | 237 |
| GCA_032323075 | 10 | 60 | 58 | 66 | 6 | 65 | 16 | 155 | 237 |
| GCA_032382575 | 10 | 60 | 58 | 66 | 6 | 65 | 16 | 155 | 237 |
| GCA_032414305 | 10 | 60 | 58 | 66 | 6 | 65 | 16 | 155 | 237 |
| GCA_032422665 | 10 | 60 | 58 | 66 | 6 | 65 | 16 | 155 | 237 |
| GCA_032498515 | 10 | 60 | 58 | 66 | 6 | 65 | 16 | 155 | 237 |
| GCA_032528445 | 10 | 60 | 58 | 66 | 6 | 65 | 16 | 155 | 237 |
| GCA_032605315 | 10 | 60 | 58 | 66 | 6 | 65 | 16 | 155 | 237 |
| GCA_032681865 | 10 | 60 | 58 | 66 | 6 | 65 | 16 | 155 | 237 |
| GCA_032683045 | 10 | 60 | 58 | 66 | 6 | 65 | 16 | 155 | 237 |
| GCA_032697385 | 10 | 60 | 58 | 66 | 6 | 65 | 16 | 155 | 237 |
| GCA_032756915 | 10 | 60 | 58 | 66 | 6 | 65 | 16 | 155 | 237 |
| GCA_032773595 | 10 | 60 | 58 | 66 | 6 | 65 | 16 | 155 | 237 |
| GCA_032872075 | 10 | 60 | 58 | 66 | 6 | 65 | 16 | 155 | 237 |
| GCA_032872175 | 10 | 60 | 58 | 66 | 6 | 65 | 16 | 155 | 237 |
| GCA_032928115 | 10 | 60 | 58 | 66 | 6 | 65 | 16 | 155 | 237 |
| GCA_032932655 | 10 | 60 | 58 | 66 | 6 | 65 | 16 | 155 | 237 |
| GCA_032940915 | 10 | 60 | 58 | 66 | 6 | 65 | 16 | 155 | 237 |
| GCA_032980465 | 10 | 60 | 58 | 66 | 6 | 65 | 16 | 155 | 237 |
| GCA_033015595 | 10 | 60 | 58 | 66 | 6 | 65 | 16 | 155 | 237 |
| GCA_033040015 | 10 | 60 | 58 | 66 | 6 | 65 | 16 | 155 | 237 |
| GCA_033051895 | 10 | 60 | 58 | 66 | 6 | 65 | 16 | 155 | 237 |
| GCA_033353715 | 10 | 60 | 58 | 66 | 6 | 65 | 16 | 155 | 237 |
| GCA_033356355 | 10 | 60 | 58 | 66 | 6 | 65 | 16 | 155 | 237 |
| GCA_033508435 | 10 | 60 | 58 | 66 | 6 | 65 | 16 | 155 | 237 |
| GCA_033674885 | 10 | 60 | 58 | 66 | 6 | 65 | 774 | 4073 | 237 |
| GCA_033674905 | 10 | 60 | 58 | 66 | 6 | 65 | 16 | 155 | 237 |
| GCA_033687905 | 10 | 60 | 58 | 66 | 6 | 65 | 16 | 155 | 237 |
| GCA_033690895 | 10 | 60 | 58 | 66 | 6 | 65 | 16 | 155 | 237 |
| GCA_033764395 | 10 | 60 | 58 | 66 | 6 | 65 | 16 | 155 | 237 |
| GCA_033818455 | 10 | 60 | 58 | 66 | 6 | 65 | 16 | 155 | 237 |
| GCA_034017925 | 10 | 60 | 58 | 66 | 6 | 65 | 16 | 155 | 237 |
| GCA_034077105 | 10 | 60 | 58 | 66 | 6 | 65 | 16 | 155 | 237 |
| GCA_034423655 | 10 | 60 | 58 | 66 | 6 | 65 | 16 | 155 | 237 |
| GCA_034423675 | 10 | 60 | 58 | 66 | 6 | 65 | 16 | 155 | 237 |
| GCA_034484505 | 10 | 60 | 58 | 66 | 6 | 65 | 16 | 155 | 237 |
| GCA_034648475 | 10 | 60 | 58 | 66 | 6 | 65 | 16 | 155 | 237 |
| GCA_034689425 | 10 | 60 | 58 | 66 | 6 | 65 | 16 | 155 | 237 |
| GCA_034689705 | 10 | 60 | 58 | 66 | 6 | 65 | 16 | 155 | 237 |
| GCA_034983385 | 10 | 60 | 58 | 66 | 6 | 65 | 16 | 155 | 237 |
| GCA_035092005 | 10 | 60 | 58 | 66 | 6 | 65 | 16 | 155 | 237 |
| GCA_035233305 | 10 | 60 | 58 | 66 | 6 | 65 | 16 | 155 | 237 |
| GCA_035319905 | 10 | 60 | 58 | 66 | 6 | 65 | 16 | 155 | 237 |
| GCA_035965655 | 10 | 60 | 58 | 66 | 6 | 65 | 16 | 155 | 237 |
| GCA_036127655 | 10 | 60 | 58 | 66 | 6 | 65 | 16 | 155 | 237 |
| GCA_036462055 | 10 | 60 | 58 | 66 | 6 | 65 | 16 | 155 | 237 |
| GCA_036624585 | 10 | 60 | 58 | 66 | 6 | 65 | 16 | 155 | 237 |
| GCA_036686945 | 10 | 60 | 58 | 66 | 6 | 65 | 16 | 155 | 237 |
| GCA_036958505 | 10 | 60 | 58 | 66 | 6 | 65 | 16 | 155 | 237 |
| GCA_036958585 | 10 | 60 | 58 | 66 | 6 | 65 | 16 | 155 | 237 |
| GCA_036958625 | 10 | 60 | 58 | 66 | 6 | 65 | 16 | 155 | 237 |
| GCA_036960045 | 10 | 60 | 58 | 66 | 6 | 65 | 16 | 155 | 237 |
| GCA_036988405 | 10 | 60 | 58 | 66 | 6 | 65 | 16 | 155 | 237 |
| GCA_037259805 | 10 | 60 | 58 | 66 | 6 | 65 | 16 | 155 | 237 |
| GCA_037745415 | 10 | 60 | 58 | 66 | 6 | 65 | 16 | 155 | 237 |
| GCA_037930855 | 10 | 60 | 58 | 66 | 6 | 65 | 16 | 155 | 237 |
| GCA_038418545 | 10 | 60 | 58 | 66 | 6 | 65 | 16 | 155 | 237 |
| GCA_038446215 | 10 | 60 | 58 | 66 | 6 | 65 | 16 | 155 | 237 |
| GCA_038626505 | 10 | 60 | 58 | 66 | 6 | 65 | 16 | 155 | 237 |
| GCA_038629325 | 10 | 60 | 58 | 66 | 6 | 65 | 16 | 155 | 237 |
| GCA_039138065 | 10 | 60 | 58 | 66 | 6 | 65 | 16 | 155 | 237 |
| GCA_039138395 | 10 | 60 | 58 | 66 | 6 | 65 | 16 | 155 | 237 |
| GCA_039717555 | 10 | 60 | 58 | 66 | 6 | 65 | 16 | 155 | 237 |
| GCA_040041675 | 10 | 60 | 58 | 66 | 6 | 65 | 16 | 155 | 237 |
| GCA_040043175 | 10 | 60 | 58 | 66 | 6 | 65 | 16 | 155 | 237 |
| GCA_040191735 | 10 | 60 | 58 | 66 | 6 | 65 | 16 | 155 | 237 |
| GCA_040251655 | 10 | 60 | 58 | 66 | 6 | 65 | 16 | 155 | 237 |
| GCA_040252495 | 10 | 60 | 58 | 66 | 6 | 65 | 16 | 155 | 237 |
| GCA_040252535 | 10 | 60 | 58 | 66 | 6 | 65 | 16 | 155 | 237 |
| GCA_040252555 | 10 | 60 | 58 | 66 | 6 | 65 | 16 | 155 | 237 |
| GCA_040442305 | 10 | 60 | 58 | 66 | 6 | 65 | 16 | 155 | 237 |
| GCA_040554665 | 10 | 60 | 58 | 66 | 6 | 65 | 16 | 155 | 237 |
| GCA_040730365 | 10 | 60 | 58 | 66 | 6 | 65 | 16 | 155 | 237 |
| GCA_040811155 | 10 | 60 | 58 | 66 | 6 | 65 | 16 | 155 | 237 |
| GCA_041218025 | 10 | 60 | 58 | 66 | 6 | 65 | 16 | 155 | 237 |
| GCA_041510965 | 10 | 60 | 58 | 66 | 6 | 65 | 16 | 155 | 237 |
| GCA_041678285 | 10 | 60 | 58 | 66 | 6 | 65 | 16 | 155 | 237 |
| GCA_041885075 | 10 | 60 | 58 | 66 | 6 | 65 | 16 | 155 | 237 |
| GCA_042218645 | 10 | 60 | 58 | 66 | 6 | 65 | 16 | 155 | 237 |
| GCA_042249845 | 1315 | 60 | 58 | 66 | 6 | 65 | 16 | 9283 | - |
| GCA_042251785 | 10 | 60 | 58 | 66 | 6 | 65 | 16 | 155 | 237 |
| GCA_042251945 | 10 | 60 | 58 | 66 | 6 | 65 | 16 | 155 | 237 |
| GCA_042251955 | 10 | 60 | 58 | 66 | 6 | 65 | 16 | 155 | 237 |
| GCA_042253245 | 10 | 60 | 58 | 66 | 6 | 65 | 16 | 155 | 237 |
| GCA_042253285 | 10 | 60 | 58 | 66 | 6 | 65 | 16 | 155 | 237 |
| GCA_042253345 | 10 | 60 | 58 | 66 | 6 | 65 | 16 | 155 | 237 |
| GCA_042698125 | 10 | 60 | 58 | 66 | 6 | 65 | 16 | 155 | 237 |
| GCA_043028645 | 10 | 60 | 58 | 66 | 6 | 65 | 16 | 155 | 237 |
| GCA_043031685 | 10 | 60 | 58 | 66 | 6 | 65 | 16 | 155 | 237 |
| GCA_043045515 | 10 | 60 | 58 | 66 | 6 | 65 | 16 | 155 | 237 |
| GCA_043882545 | 10 | 60 | 58 | 66 | 6 | 65 | 16 | 155 | 237 |
| GCA_043958795 | 10 | 60 | 58 | 66 | 6 | 65 | 16 | 155 | 237 |
| GCA_044488245 | 10 | 60 | 58 | 66 | 6 | 65 | 16 | 155 | 237 |
| GCA_044981385 | 10 | 60 | 58 | 66 | 6 | 65 | 16 | 155 | 237 |
| GCA_044981605 | 10 | 60 | 58 | 66 | 6 | 65 | 16 | 155 | 237 |
| GCA_044983025 | 10 | 60 | 58 | 66 | 6 | 65 | 16 | 155 | 237 |
| GCA_045099455 | 10 | 60 | 58 | 66 | 6 | 65 | 16 | 155 | 237 |
| GCA_045099795 | 10 | 60 | 58 | 66 | 6 | 65 | 16 | 155 | 237 |
| GCA_045187165 | 10 | 60 | 58 | 66 | 6 | 65 | 16 | 155 | 237 |
| GCA_045187225 | 10 | 60 | 58 | 66 | 6 | 65 | 16 | 155 | 237 |
| GCA_045341015 | 10 | 60 | 58 | 66 | 6 | 65 | 16 | 155 | 237 |
| GCA_045698915 | 10 | 60 | 58 | 66 | 6 | 65 | 16 | 155 | 237 |
| SAL20_001 | 10 | 60 | 58 | 66 | 6 | 65 | 16 | 155 | 237 |
| SAL20_009 | 10 | 60 | 58 | 66 | 6 | 65 | 16 | 155 | 237 |
| SAL20_011 | 10 | 60 | 58 | 66 | 6 | 65 | 16 | 155 | 237 |
| SAL20_033 | 10 | 60 | 58 | 66 | 6 | 65 | 16 | 155 | 237 |
| SAL20_040 | 10 | 60 | 58 | 66 | 6 | 65 | 16 | 155 | 237 |
| SAL20_062 | 10 | 60 | 58 | 66 | 6 | 65 | 16 | 155 | 237 |
| SAL20_099 | 10 | 60 | 58 | 66 | 6 | 65 | 16 | 155 | 237 |
| SAL20_131 | 10 | 60 | 58 | 66 | 6 | 65 | 16 | 155 | 237 |
| SAL20_132 | 10 | 60 | 58 | 66 | 6 | 65 | 16 | 155 | 237 |
| SAL20_144 | 10 | 60 | 58 | 66 | 6 | 65 | 16 | 155 | 237 |
| SAL20_147 | 10 | 60 | 58 | 66 | 6 | 65 | 16 | 155 | 237 |
| SAL20_195 | 10 | 60 | 58 | 66 | 6 | 65 | 16 | 155 | 237 |
| SAL20_196 | 10 | 60 | 58 | 66 | 6 | 65 | 16 | 155 | 237 |
| SAL2022_017 | 10 | 60 | 58 | 66 | 6 | 65 | 16 | 155 | 237 |
| SAL2022_034 | 10 | 60 | 58 | 66 | 6 | 65 | 16 | 155 | 237 |
| SAL2022_045 | 10 | 60 | 58 | 66 | 6 | 65 | 16 | 155 | 237 |
| SAL2022_146 | 10 | 60 | 58 | 66 | 6 | 65 | 16 | 155 | 237 |
| SAL2022_192 | 10 | 60 | 58 | 66 | 6 | 65 | 16 | 155 | 237 |
| SAL2022_196 | 10 | 60 | 58 | 66 | 6 | 65 | 16 | 155 | 237 |
| SAL2022_238 | 10 | 60 | 58 | 66 | 6 | 65 | 16 | 155 | 237 |
| SAL2022_287 | 10 | 60 | 58 | 66 | 6 | 65 | 16 | 155 | 237 |
| SAL2022_298 | 10 | 60 | 58 | 66 | 6 | 65 | 16 | 155 | 237 |
| SAL2022_317 | 10 | 60 | 58 | 66 | 6 | 65 | 16 | 155 | 237 |
| SAL2022_324 | 10 | 60 | 58 | 66 | 6 | 65 | 16 | 155 | 237 |
| SAL2022_409 | 10 | 60 | 58 | 66 | 6 | 65 | 16 | 155 | 237 |
| SAL2022_427 | 10 | 60 | 58 | 66 | 6 | 65 | 16 | 155 | 237 |
| SAL2022_438 | 10 | 60 | 58 | 66 | 6 | 65 | 16 | 155 | 237 |
| SAL2022_511 | 10 | 60 | 58 | 66 | 6 | 65 | 16 | 155 | 237 |
| SAL2022_519 | 10 | 60 | 58 | 66 | 6 | 65 | 16 | 155 | 237 |
| SAL2022_537 | 10 | 60 | 58 | 66 | 6 | 65 | 16 | 155 | 237 |
| SAL2022_542 | 10 | 60 | 58 | 66 | 6 | 65 | 16 | 155 | 237 |
| SAL2022_571 | 10 | 60 | 58 | 66 | 6 | 65 | 16 | 155 | 237 |
| SAL21_054 | 10 | 60 | 58 | 66 | 6 | 65 | 16 | 155 | 237 |
| SAL21_121 | 10 | 60 | 58 | 66 | 6 | 65 | 16 | 155 | 237 |
| SAL21_125 | 10 | 60 | 58 | 66 | 6 | 65 | 16 | 155 | 237 |
| SAL21_128 | 10 | 60 | 58 | 66 | 6 | 65 | 16 | 155 | 237 |
| SAL21_155 | 10 | 60 | 58 | 66 | 6 | 65 | 16 | 155 | 237 |
| SAL21_175 | 10 | 60 | 58 | 66 | 6 | 65 | 16 | 155 | 237 |
| SAL21_176 | 10 | 60 | 58 | 66 | 6 | 65 | 16 | 155 | 237 |
| SAL21_181 | 10 | 60 | 58 | 66 | 6 | 65 | 16 | 155 | 237 |
| SAL21_259 | 10 | 60 | 58 | 66 | 6 | 65 | 16 | 155 | 237 |
| SAL21_292 | 10 | 60 | 58 | 66 | 6 | 65 | 16 | 155 | 237 |
| SAL21_293 | 10 | 60 | 58 | 66 | 6 | 65 | 16 | 155 | 237 |
| SAL21_301 | 10 | 60 | 58 | 66 | 6 | 65 | 16 | 155 | 237 |
| SAL21_304 | 10 | 60 | 58 | 66 | 6 | 65 | 16 | 155 | 237 |
| SAL21_449 | 10 | 60 | 58 | 66 | 6 | 65 | 16 | 155 | 237 |
| SAL21_463 | 10 | 60 | 58 | 66 | 6 | 65 | 16 | 155 | 237 |
| SAL23_011 | 10 | 571 | 58 | 66 | 6 | 65 | 16 | - | 237 |
| SAL23_133 | 10 | 60 | 58 | 66 | 6 | 65 | 16 | 155 | 237 |
| SAL23_176 | 10 | 60 | 58 | 66 | 6 | 65 | 16 | 155 | 237 |
| SAL23_185 | 10 | 60 | 58 | 66 | 6 | 65 | 16 | 155 | 237 |
| SAL23_204 | 10 | 60 | 58 | 66 | 6 | 65 | 16 | 155 | 237 |
| SAL23_207 | 10 | 60 | 58 | 66 | 6 | 65 | 16 | 155 | 237 |
| SAL23_239 | 10 | 60 | 58 | 66 | 6 | 65 | 16 | 155 | 237 |
| SAL23_512 | 10 | 60 | 58 | 66 | 6 | 65 | 16 | 155 | 237 |
| SAL23_517 | 10 | 60 | 58 | 66 | 6 | 65 | 16 | 155 | 237 |
| SAL23_522 | 10 | 60 | 58 | 66 | 6 | 65 | 16 | 155 | 237 |
| ZJ22HZ0420 | 10 | 60 | 58 | 66 | 6 | 65 | 16 | 155 | 237 |
| ZJ22HZ0421 | 10 | 60 | 58 | 66 | 6 | 65 | 16 | 155 | 237 |
| ZJHZ22SAL037 | 10 | 60 | 58 | 66 | 6 | 65 | 16 | 155 | 237 |
| ZJHZ22SAL102 | 10 | 60 | 58 | 66 | 6 | 65 | 16 | 155 | 237 |
| ZJHZ22SAL110 | 10 | 60 | 58 | 66 | 6 | 65 | 16 | 155 | 237 |
| ZJHZ22SAL154 | 10 | 60 | 58 | 66 | 6 | 65 | 16 | 155 | 237 |
